# Supplementary material for: In silico identification and in vitro assessment of a potential anti-breast cancer activity of antimicrobial peptide retrieved from the ATMP1 Anabas testudineus fish peptide
Source: PeerJ. 2023 Jul 19;11:e15651. doi: 10.7717/peerj.15651 (PMC10362845; doi:10.7717/peerj.15651)
Supplement: Supplemental Information 1 [file peerj-11-15651-s001.xlsx]

## Sheet: ADP3
		APD3														ProtParam
S.no	AMPs	Sequence length	total hydrophobic ratio%	total net charge	GRAVY	molecular weight	molecular formula	molar extinction coefficient	Protein-binding Potential			Class	Name	Similarity	Activity	Theoretical pI	negatively charged residues (Asp + Glu)	positively charged residues (Arg + Lys)	Instability index
1	AHPPTTTTTTTTTTTTTAAPATTT	24	0.17	0.25	-0.5	2348.51	C97H162N26O41S0	0	1.6 kcal/mol		AP02877	Bacteriocin	Hominicin	0.32	Anti-Gram+ & Gram-, Anti-MRSA	6.79	0	0	28.92 stable
2	CHPPTTTTTTTTTTTTTAAPATTT	24	0.17	0.25	-0.470833	2380.57	C97H162N26O41S1	62.5	1.62 kcal/mol		AP02877	Bacteriocin	Hominicin	0.32	Anti-Gram+ & Gram-, Anti-MRSA	6.73	0	0	46.04 unstable
3	DHPPTTTTTTTTTTTTTAAPATTT	24	0.13	-0.75	-0.720833	2392.51	C98H162N26O43S0	0	2.04 kcal/mol		AP02877	Bacteriocin	Hominicin	0.32	Anti-Gram+ & Gram-, Anti-MRSA	5.08	1	0	32.46 stable
4	EHPPTTTTTTTTTTTTTAAPATTT	24	0.13	-0.75	-0.720833	2406.54	C99H164N26O43S0	0	1.96 kcal/mol		AP02877	Bacteriocin	Hominicin	0.32	Anti-Gram+ & Gram-, Anti-MRSA	5.24	1	0	29.32 stable
5	FHPPTTTTTTTTTTTTTAAPATTT	24	0.17	0.25	-0.458333	2424.6	C103H166N26O41S0	0	1.55 kcal/mol		AP02877	Bacteriocin	Hominicin	0.32	Anti-Gram+ & Gram-, Anti-MRSA	6.74	0	0	32.46 stable
6	GHPPTTTTTTTTTTTTTAAPATTT	24	0.13	0.25	-0.591667	2334.48	C96H160N26O41S0	0	1.64 kcal/mol		AP02877	Bacteriocin	Hominicin	0.32	Anti-Gram+ & Gram-, Anti-MRSA	6.74	0	0	32.46 stable
7	HHPPTTTTTTTTTTTTTAAPATTT	24	0.13	0.5	-0.708333	2414.57	C100H164N28O41S0	0	1.87 kcal/mol		AP02877	Bacteriocin	Hominicin	0.32	Anti-Gram+ & Gram-, Anti-MRSA	6.92	0	0	32.46 stable
8	IHPPTTTTTTTTTTTTTAAPATTT	24	0.17	0.25	-0.3875	2390.58	C100H168N26O41S0	0	1.47 kcal/mol		AP02877	Bacteriocin	Hominicin	0.36	Anti-Gram+ & Gram-, Anti-MRSA	6.74	0	0	37.60 stable
9	KHPPTTTTTTTTTTTTTAAPATTT	24	0.13	1.25	-0.7375	2405.59	C100H169N27O41S0	0	1.91 kcal/mol		AP02877	Bacteriocin	Hominicin	0.32	Anti-Gram+ & Gram-, Anti-MRSA	8.76	0	1	32.46 stable
10	LHPPTTTTTTTTTTTTTAAPATTT	24	0.17	0.25	-0.416667	2390.58	C100H168N26O41S0	0	1.47 kcal/mol		AP02877	Bacteriocin	Hominicin	0.32	Anti-Gram+ & Gram-, Anti-MRSA	6.74	0	0	32.46 stable
11	MHPPTTTTTTTTTTTTTAAPATTT	24	0.17	0.25	-0.495833	2408.62	C99H166N26O41S1	0	1.58 kcal/mol		AP02877	Bacteriocin	Hominicin	0.32	Anti-Gram+ & Gram-, Anti-MRSA	6.49	0	0	56.33 unstable
12	NHPPTTTTTTTTTTTTTAAPATTT	24	0.13	0.25	-0.720833	2391.53	C98H164N26O42S0	0	1.95 kcal/mol		AP02877	Bacteriocin	Hominicin	0.32	Anti-Gram+ & Gram-, Anti-MRSA	6.74	0	0	32.46 stable
13	PHPPTTTTTTTTTTTTTAAPATTT	24	0.13	0.25	-0.641667	2374.54	C99H164N26O41S0	0	1.68 kcal/mol		AP02877	Bacteriocin	Hominicin	0.32	Anti-Gram+ & Gram-, Anti-MRSA	7.17	0	0	32.46 stable
14	QHPPTTTTTTTTTTTTTAAPATTT	24	0.13	0.25	-0.720833	2405.55	C99H165N27O42S0	0	1.91 kcal/mol		AP02877	Bacteriocin	Hominicin	0.32	Anti-Gram+ & Gram-, Anti-MRSA	6.74	0	0	32.46 stable
15	RHPPTTTTTTTTTTTTTAAPATTT	24	0.13	1.25	-0.7625	2433.61	C100H169N29O41S0	0	2.3 kcal/mol		AP02877	Bacteriocin	Hominicin	0.32	Anti-Gram+ & Gram-, Anti-MRSA	9.76	0	1	40.48 unstable
16	SHPPTTTTTTTTTTTTTAAPATTT	24	0.13	0.25	-0.608333	2364.5	C97H162N26O42S0	0	1.82 kcal/mol		AP02877	Bacteriocin	Hominicin	0.32	Anti-Gram+ & Gram-, Anti-MRSA	6.46	0	0	32.46 stable
17	VHPPTTTTTTTTTTTTTAAPATTT	24	0.17	0.25	-0.4	2376.56	C99H166N26O41S0	0	1.51 kcal/mol		AP02877	Bacteriocin	Hominicin	0.32	Anti-Gram+ & Gram-, Anti-MRSA	6.71	0	0	32.46 stable
18	WHPPTTTTTTTTTTTTTAAPATTT	24	0.17	0.25	-0.6125	2463.64	C105H168N27O41S0	5550	1.58 kcal/mol		AP02877	Bacteriocin	Hominicin	0.32	Anti-Gram+ & Gram-, Anti-MRSA	6.74	0	0	42.33 unstable
19	YHPPTTTTTTTTTTTTTAAPATTT	24	0.13	0.25	-0.629167	2440.6	C103H166N26O42S0	1490	1.68 kcal/mol		AP02877	Bacteriocin	Hominicin	0.32	Anti-Gram+ & Gram-, Anti-MRSA	6.74	0	0	37.60 stable
20	TAPPTTTTTTTTTTTTTAAPATTT	24	0.17	0	-0.395833	2312.47	C95H162N24O42S0	0	1.51 kcal/mol		AP02877	Bacteriocin	Hominicin	0.3462	Anti-Gram+ & Gram-, Anti-MRSA	5.19	0	0	41.68 unstable
21	TCPPTTTTTTTTTTTTTAAPATTT	24	0.17	0	-0.366667	2344.53	C95H162N24O42S1	62.5	1.54 kcal/mol		AP02877	Bacteriocin	Hominicin	0.3462	Anti-Gram+ & Gram-, Anti-MRSA	5.18	0	0	41.68 unstable
22	TDPPTTTTTTTTTTTTTAAPATTT	24	0.13	-1	-0.616667	2356.48	C96H162N24O44S0	0	1.95 kcal/mol		AP02877	Bacteriocin	Hominicin	0.3462	Anti-Gram+ & Gram-, Anti-MRSA	3.8	1	0	33.66 stable
23	TEPPTTTTTTTTTTTTTAAPATTT	24	0.13	-1	-0.616667	2370.5	C97H164N24O44S0	0	1.87 kcal/mol		AP02877	Bacteriocin	Hominicin	0.3462	Anti-Gram+ & Gram-, Anti-MRSA	4	1	0	49.71 unstable
24	TFPPTTTTTTTTTTTTTAAPATTT	24	0.17	0	-0.354167	2388.57	C101H166N24O42S0	0	1.47 kcal/mol		AP02877	Bacteriocin	Hominicin	0.3462	Anti-Gram+ & Gram-, Anti-MRSA	5.19	0	0	46.83 unstable
25	TGPPTTTTTTTTTTTTTAAPATTT	24	0.13	0	-0.4875	2298.44	C94H160N24O42S0	0	1.55 kcal/mol		AP02877	Bacteriocin	Hominicin	0.3462	Anti-Gram+ & Gram-, Anti-MRSA	5.19	0	0	30.12 stable
26	TIPPTTTTTTTTTTTTTAAPATTT	24	0.17	0	-0.283333	2354.55	C98H168N24O42S0	0	1.38 kcal/mol		AP02877	Bacteriocin	Hominicin	0.36	Anti-Gram+ & Gram-, Anti-MRSA	5.19	0	0	32.46 stable
27	TKPPTTTTTTTTTTTTTAAPATTT	24	0.13	1	-0.633333	2369.56	C98H169N25O42S0	0	1.82 kcal/mol		AP02877	Bacteriocin	Hominicin	0.3462	Anti-Gram+ & Gram-, Anti-MRSA	8.41	0	1	30.52 stable
28	TLPPTTTTTTTTTTTTTAAPATTT	24	0.17	0	-0.3125	2354.55	C98H168N24O42S0	0	1.38 kcal/mol		AP02877	Bacteriocin	Hominicin	0.3462	Anti-Gram+ & Gram-, Anti-MRSA	5.19	0	0	41.68 unstable
29	TMPPTTTTTTTTTTTTTAAPATTT	24	0.17	0	-0.391667	2372.59	C97H166N24O42S1	0	1.49 kcal/mol		AP02877	Bacteriocin	Hominicin	0.3462	Anti-Gram+ & Gram-, Anti-MRSA	5.19	0	0	51.97 unstable
30	TNPPTTTTTTTTTTTTTAAPATTT	24	0.13	0	-0.616667	2355.49	C96H164N24O43S0	0	1.87 kcal/mol		AP02877	Bacteriocin	Hominicin	0.3462	Anti-Gram+ & Gram-, Anti-MRSA	5.19	0	0	26.20 stable
31	TPPPTTTTTTTTTTTTTAAPATTT	24	0.13	0	-0.5375	2338.51	C97H164N24O42S0	0	1.59 kcal/mol		AP02877	Bacteriocin	Hominicin	0.3462	Anti-Gram+ & Gram-, Anti-MRSA	5.19	0	0	41.68 unstable
32	TQPPTTTTTTTTTTTTTAAPATTT	24	0.13	0	-0.616667	2369.52	C97H165N25O43S0	0	1.82 kcal/mol		AP02877	Bacteriocin	Hominicin	0.3462	Anti-Gram+ & Gram-, Anti-MRSA	5.19	0	0	38.54 stable
33	TRPPTTTTTTTTTTTTTAAPATTT	24	0.13	1	-0.658333	2397.58	C98H169N27O42S0	0	2.21 kcal/mol		AP02877	Bacteriocin	Hominicin	0.3462	Anti-Gram+ & Gram-, Anti-MRSA	9.41	0	1	41.68 unstable
34	TSPPTTTTTTTTTTTTTAAPATTT	24	0.13	0	-0.504167	2328.47	C95H162N24O43S0	0	1.73 kcal/mol		AP02877	Bacteriocin	Hominicin	0.3462	Anti-Gram+ & Gram-, Anti-MRSA	5.19	0	0	51.97 unstable
35	TTPPTTTTTTTTTTTTTAAPATTT	24	0.13	0	-0.5	2342.49	C96H164N24O43S0	0	1.7 kcal/mol		AP02877	Bacteriocin	Hominicin	0.36	Anti-Gram+ & Gram-, Anti-MRSA	5.19	0	0	33.66 stable
36	TVPPTTTTTTTTTTTTTAAPATTT	24	0.17	0	-0.295833	2340.52	C97H166N24O42S0	0	1.42 kcal/mol		AP02877	Bacteriocin	Hominicin	0.3462	Anti-Gram+ & Gram-, Anti-MRSA	5.19	0	0	41.68 unstable
37	TWPPTTTTTTTTTTTTTAAPATTT	24	0.17	0	-0.508333	2427.6	C103H168N25O42S0	5550	1.49 kcal/mol		AP02877	Bacteriocin	Hominicin	0.3462	Anti-Gram+ & Gram-, Anti-MRSA	5.19	0	0	27.40 stable
38	TYPPTTTTTTTTTTTTTAAPATTT	24	0.13	0	-0.525	2404.56	C101H166N24O43S0	1490	1.59 kcal/mol		AP02877	Bacteriocin	Hominicin	0.3462	Anti-Gram+ & Gram-, Anti-MRSA	5.18	0	0	38.80 stable
39	THAPTTTTTTTTTTTTTAAPATTT	24	0.17	0.25	-0.4625	2352.49	C96H162N26O42S0	0	1.71 kcal/mol		AP02877	Bacteriocin	Hominicin	0.3462	Anti-Gram+ & Gram-, Anti-MRSA	6.4	0	0	33.66 stable
40	THCPTTTTTTTTTTTTTAAPATTT	24	0.17	0.25	-0.433333	2384.56	C96H162N26O42S1	62.5	1.73 kcal/mol		AP02877	Bacteriocin	Hominicin	0.3462	Anti-Gram+ & Gram-, Anti-MRSA	6.4	0	0	33.66 stable
41	THDPTTTTTTTTTTTTTAAPATTT	24	0.13	-0.75	-0.683333	2396.5	C97H162N26O44S0	0	2.15 kcal/mol		AP02877	Bacteriocin	Hominicin	0.3462	Anti-Gram+ & Gram-, Anti-MRSA	5.05	1	0	25.63 stable
42	THEPTTTTTTTTTTTTTAAPATTT	24	0.13	-0.75	-0.683333	2410.53	C98H164N26O44S0	0	2.07 kcal/mol		AP02877	Bacteriocin	Hominicin	0.3462	Anti-Gram+ & Gram-, Anti-MRSA	5.21	1	0	33.66 stable
43	THFPTTTTTTTTTTTTTAAPATTT	24	0.17	0.25	-0.420833	2428.59	C102H166N26O42S0	0	1.66 kcal/mol		AP02877	Bacteriocin	Hominicin	0.3462	Anti-Gram+ & Gram-, Anti-MRSA	6.4	0	0	29.34 stable
44	THGPTTTTTTTTTTTTTAAPATTT	24	0.13	0.25	-0.554167	2338.46	C95H160N26O42S0	0	1.74 kcal/mol		AP02877	Bacteriocin	Hominicin	0.3462	Anti-Gram+ & Gram-, Anti-MRSA	6.4	0	0	21.31 stable
45	THHPTTTTTTTTTTTTTAAPATTT	24	0.13	0.5	-0.670833	2418.55	C99H164N28O42S0	0	1.98 kcal/mol		AP02877	Bacteriocin	Hominicin	0.3462	Anti-Gram+ & Gram-, Anti-MRSA	6.61	0	0	24.43 stable
46	THIPTTTTTTTTTTTTTAAPATTT	24	0.17	0.25	-0.35	2394.57	C99H168N26O42S0	0	1.58 kcal/mol		AP02877	Bacteriocin	Hominicin	0.3462	Anti-Gram+ & Gram-, Anti-MRSA	6.4	0	0	42.74 unstable
47	THKPTTTTTTTTTTTTTAAPATTT	24	0.13	1.25	-0.7	2409.58	C99H169N27O42S0	0	2.01 kcal/mol		AP02877	Bacteriocin	Hominicin	0.3462	Anti-Gram+ & Gram-, Anti-MRSA	8.44	0	1	32.36 stable
48	THLPTTTTTTTTTTTTTAAPATTT	24	0.17	0.25	-0.379167	2394.57	C99H168N26O42S0	0	1.58 kcal/mol		AP02877	Bacteriocin	Hominicin	0.3462	Anti-Gram+ & Gram-, Anti-MRSA	6.4	0	0	33.66 stable
49	THMPTTTTTTTTTTTTTAAPATTT	24	0.17	0.25	-0.458333	2412.61	C98H166N26O42S1	0	1.69 kcal/mol		AP02877	Bacteriocin	Hominicin	0.3462	Anti-Gram+ & Gram-, Anti-MRSA	6.4	0	0	43.94 unstable
50	THNPTTTTTTTTTTTTTAAPATTT	24	0.13	0.25	-0.683333	2395.52	C97H164N26O43S0	0	2.06 kcal/mol		AP02877	Bacteriocin	Hominicin	0.3462	Anti-Gram+ & Gram-, Anti-MRSA	6.4	0	0	34.30 stable
51	THQPTTTTTTTTTTTTTAAPATTT	24	0.13	0.25	-0.683333	2409.54	C98H165N27O43S0	0	2.01 kcal/mol		AP02877	Bacteriocin	Hominicin	0.3462	Anti-Gram+ & Gram-, Anti-MRSA	6.4	0	0	33.66 stable
52	THRPTTTTTTTTTTTTTAAPATTT	24	0.13	1.25	-0.725	2437.6	C99H169N29O42S0	0	2.4 kcal/mol		AP02877	Bacteriocin	Hominicin	0.3462	Anti-Gram+ & Gram-, Anti-MRSA	9.44	0	1	33.66 stable
53	THSPTTTTTTTTTTTTTAAPATTT	24	0.13	0.25	-0.570833	2368.49	C96H162N26O43S0	0	1.92 kcal/mol		AP02877	Bacteriocin	Hominicin	0.3462	Anti-Gram+ & Gram-, Anti-MRSA	6.4	0	0	43.94 unstable
54	THTPTTTTTTTTTTTTTAAPATTT	24	0.13	0.25	-0.566667	2382.52	C97H164N26O43S0	0	1.89 kcal/mol		AP02877	Bacteriocin	Hominicin	0.36	Anti-Gram+ & Gram-, Anti-MRSA	6.4	0	0	22.49 stable
55	THVPTTTTTTTTTTTTTAAPATTT	24	0.17	0.25	-0.3625	2380.55	C98H166N26O42S0	0	1.62 kcal/mol		AP02877	Bacteriocin	Hominicin	0.3462	Anti-Gram+ & Gram-, Anti-MRSA	6.4	0	0	33.66 stable
56	THWPTTTTTTTTTTTTTAAPATTT	24	0.17	0.25	-0.575	2467.62	C104H168N27O42S0	5550	1.69 kcal/mol		AP02877	Bacteriocin	Hominicin	0.3462	Anti-Gram+ & Gram-, Anti-MRSA	6.4	0	0	24.43 stable
57	THYPTTTTTTTTTTTTTAAPATTT	24	0.13	0.25	-0.591667	2444.59	C102H166N26O43S0	1490	1.79 kcal/mol		AP02877	Bacteriocin	Hominicin	0.3462	Anti-Gram+ & Gram-, Anti-MRSA	6.4	0	0	49.08 unstable
58	THPATTTTTTTTTTTTTAAPATTT	24	0.17	0.25	-0.4625	2352.49	C96H162N26O42S0	0	1.71 kcal/mol		AP02877	Bacteriocin	Hominicin	0.3846	Anti-Gram+ & Gram-, Anti-MRSA	6.4	0	0	32.46 stable
59	THPCTTTTTTTTTTTTTAAPATTT	24	0.17	0.25	-0.433333	2384.56	C96H162N26O42S1	62.5	1.73 kcal/mol		AP02877	Bacteriocin	Hominicin	0.3462	Anti-Gram+ & Gram-, Anti-MRSA	6.4	0	0	34.88 stable
60	THPDTTTTTTTTTTTTTAAPATTT	24	0.13	-0.75	-0.683333	2396.5	C97H162N26O44S0	0	2.15 kcal/mol		AP02877	Bacteriocin	Hominicin	0.3462	Anti-Gram+ & Gram-, Anti-MRSA	5.05	1	0	15.03 stable
61	THPETTTTTTTTTTTTTAAPATTT	24	0.13	-0.75	-0.683333	2410.53	C98H164N26O44S0	0	2.07 kcal/mol		AP02877	Bacteriocin	Hominicin	0.3462	Anti-Gram+ & Gram-, Anti-MRSA	5.21	1	0	31.68 stable
62	THPFTTTTTTTTTTTTTAAPATTT	24	0.17	0.25	-0.420833	2428.59	C102H166N26O42S0	0	1.66 kcal/mol		AP02877	Bacteriocin	Hominicin	0.3462	Anti-Gram+ & Gram-, Anti-MRSA	6.4	0	0	32.46 stable
63	THPGTTTTTTTTTTTTTAAPATTT	24	0.13	0.25	-0.554167	2338.46	C95H160N26O42S0	0	1.74 kcal/mol		AP02877	Bacteriocin	Hominicin	0.3462	Anti-Gram+ & Gram-, Anti-MRSA	6.4	0	0	20.90 stable
64	THPHTTTTTTTTTTTTTAAPATTT	24	0.13	0.5	-0.670833	2418.55	C99H164N28O42S0	0	1.98 kcal/mol		AP02877	Bacteriocin	Hominicin	0.3462	Anti-Gram+ & Gram-, Anti-MRSA	6.61	0	0	21.29 stable
65	THPITTTTTTTTTTTTTAAPATTT	24	0.17	0.25	-0.35	2394.57	C99H168N26O42S0	0	1.58 kcal/mol		AP02877	Bacteriocin	Hominicin	0.3462	Anti-Gram+ & Gram-, Anti-MRSA	6.4	0	0	24.43 stable
66	THPKTTTTTTTTTTTTTAAPATTT	24	0.13	1.25	-0.7	2409.58	C99H169N27O42S0	0	2.01 kcal/mol		AP02877	Bacteriocin	Hominicin	0.3462	Anti-Gram+ & Gram-, Anti-MRSA	8.44	0	1	24.43 stable
67	THPLTTTTTTTTTTTTTAAPATTT	24	0.17	0.25	-0.379167	2394.57	C99H168N26O42S0	0	1.58 kcal/mol		AP02877	Bacteriocin	Hominicin	0.3462	Anti-Gram+ & Gram-, Anti-MRSA	6.4	0	0	24.43 stable
68	THPMTTTTTTTTTTTTTAAPATTT	24	0.17	0.25	-0.458333	2412.61	C98H166N26O42S1	0	1.69 kcal/mol		AP02877	Bacteriocin	Hominicin	0.3462	Anti-Gram+ & Gram-, Anti-MRSA	6.4	0	0	20.09 stable
69	THPNTTTTTTTTTTTTTAAPATTT	24	0.13	0.25	-0.683333	2395.52	C97H164N26O43S0	0	2.06 kcal/mol		AP02877	Bacteriocin	Hominicin	0.3462	Anti-Gram+ & Gram-, Anti-MRSA	6.4	0	0	20.90 stable
70	THPQTTTTTTTTTTTTTAAPATTT	24	0.13	0.25	-0.683333	2409.54	C98H165N27O43S0	0	2.01 kcal/mol		AP02877	Bacteriocin	Hominicin	0.3462	Anti-Gram+ & Gram-, Anti-MRSA	6.4	0	0	32.46 stable
71	THPRTTTTTTTTTTTTTAAPATTT	24	0.13	1.25	-0.725	2437.6	C99H169N29O42S0	0	2.4 kcal/mol		AP02877	Bacteriocin	Hominicin	0.3462	Anti-Gram+ & Gram-, Anti-MRSA	9.44	0	1	21.29 stable
72	THPSTTTTTTTTTTTTTAAPATTT	24	0.13	0.25	-0.570833	2368.49	C96H162N26O43S0	0	1.92 kcal/mol		AP02877	Bacteriocin	Hominicin	0.3462	Anti-Gram+ & Gram-, Anti-MRSA	6.4	0	0	32.46 stable
73	THPTTTTTTTTTTTTTTAAPATTT	24	0.13	0.25	-0.566667	2382.52	C97H164N26O43S0	0	1.89 kcal/mol		AP02877	Bacteriocin	Hominicin	0.3462	Anti-Gram+ & Gram-, Anti-MRSA	6.4	0	0	24.43 stable
74	THPVTTTTTTTTTTTTTAAPATTT	24	0.17	0.25	-0.3625	2380.55	C98H166N26O42S0	0	1.62 kcal/mol		AP02877	Bacteriocin	Hominicin	0.3462	Anti-Gram+ & Gram-, Anti-MRSA	6.4	0	0	28.92 stable
75	THPWTTTTTTTTTTTTTAAPATTT	24	0.17	0.25	-0.575	2467.62	C104H168N27O42S0	5550	1.69 kcal/mol		AP02877	Bacteriocin	Hominicin	0.3462	Anti-Gram+ & Gram-, Anti-MRSA	6.4	0	0	16.97 stable
76	THPYTTTTTTTTTTTTTAAPATTT	24	0.13	0.25	-0.591667	2444.59	C102H166N26O43S0	1490	1.79 kcal/mol		AP02877	Bacteriocin	Hominicin	0.3462	Anti-Gram+ & Gram-, Anti-MRSA	6.4	0	0	20.90 stable
77	THPPATTTTTTTTTTTTAAPATTT	24	0.17	0.25	-0.5	2348.5	C97H162N26O41S0	0	1.6 kcal/mol		AP02877	Bacteriocin	Hominicin	0.3846	Anti-Gram+ & Gram-, Anti-MRSA	6.4	0	0	40.48 unstable
78	THPPCTTTTTTTTTTTTAAPATTT	24	0.17	0.25	-0.470833	2380.57	C97H162N26O41S1	62.5	1.62 kcal/mol		AP02877	Bacteriocin	Hominicin	0.3462	Anti-Gram+ & Gram-, Anti-MRSA	6.4	0	0	42.90 unstable
79	THPPDTTTTTTTTTTTTAAPATTT	24	0.13	-0.75	-0.720833	2392.51	C98H162N26O43S0	0	2.04 kcal/mol		AP02877	Bacteriocin	Hominicin	0.3462	Anti-Gram+ & Gram-, Anti-MRSA	5.05	1	0	23.05 stable
80	THPPETTTTTTTTTTTTAAPATTT	24	0.13	-0.75	-0.720833	2406.54	C99H164N26O43S0	0	1.96 kcal/mol		AP02877	Bacteriocin	Hominicin	0.3462	Anti-Gram+ & Gram-, Anti-MRSA	5.21	1	0	39.70 stable
81	THPPFTTTTTTTTTTTTAAPATTT	24	0.17	0.25	-0.458333	2424.6	C103H166N26O41S0	0	1.55 kcal/mol		AP02877	Bacteriocin	Hominicin	0.3462	Anti-Gram+ & Gram-, Anti-MRSA	6.4	0	0	40.48 unstable
82	THPPGTTTTTTTTTTTTAAPATTT	24	0.13	0.25	-0.591667	2334.48	C96H160N26O41S0	0	1.64 kcal/mol		AP02877	Bacteriocin	Hominicin	0.3462	Anti-Gram+ & Gram-, Anti-MRSA	6.4	0	0	28.92 stable
83	THPPHTTTTTTTTTTTTAAPATTT	24	0.13	0.5	-0.708333	2414.57	C100H164N28O41S0	0	1.87 kcal/mol		AP02877	Bacteriocin	Hominicin	0.3462	Anti-Gram+ & Gram-, Anti-MRSA	6.61	0	0	29.32 stable
84	THPPITTTTTTTTTTTTAAPATTT	24	0.17	0.25	-0.3875	2390.58	C100H168N26O41S0	0	1.47 kcal/mol		AP02877	Bacteriocin	Hominicin	0.3462	Anti-Gram+ & Gram-, Anti-MRSA	6.4	0	0	32.46 stable
85	THPPKTTTTTTTTTTTTAAPATTT	24	0.13	1.25	-0.7375	2405.59	C100H169N27O41S0	0	1.91 kcal/mol		AP02877	Bacteriocin	Hominicin	0.3462	Anti-Gram+ & Gram-, Anti-MRSA	8.44	0	1	32.46 stable
86	THPPLTTTTTTTTTTTTAAPATTT	24	0.17	0.25	-0.416667	2390.58	C100H168N26O41S0	0	1.47 kcal/mol		AP02052	Bacteriocin	Sclerosin	0.3571	Anti-Gram+, Antifungal	6.4	0	0	32.46 stable
87	THPPMTTTTTTTTTTTTAAPATTT	24	0.17	0.25	-0.495833	2408.62	C99H166N26O41S1	0	1.58 kcal/mol		AP02877	Bacteriocin	Hominicin	0.3462	Anti-Gram+ & Gram-, Anti-MRSA	6.4	0	0	28.12 stable
88	THPPNTTTTTTTTTTTTAAPATTT	24	0.13	0.25	-0.720833	2391.53	C98H164N26O42S0	0	1.95 kcal/mol		AP02877	Bacteriocin	Hominicin	0.3462	Anti-Gram+ & Gram-, Anti-MRSA	6.4	0	0	28.92 stable
89	THPPPTTTTTTTTTTTTAAPATTT	24	0.13	0.25	-0.641667	2374.54	C99H164N26O41S0	0	1.68 kcal/mol		AP02877	Bacteriocin	Hominicin	0.3462	Anti-Gram+ & Gram-, Anti-MRSA	6.4	0	0	40.48 unstable
90	THPPQTTTTTTTTTTTTAAPATTT	24	0.13	0.25	-0.720833	2405.55	C99H165N27O42S0	0	1.91 kcal/mol		AP02877	Bacteriocin	Hominicin	0.3462	Anti-Gram+ & Gram-, Anti-MRSA	6.4	0	0	40.48 unstable
91	THPPRTTTTTTTTTTTTAAPATTT	24	0.13	1.25	-0.7625	2433.61	C100H169N29O41S0	0	2.3 kcal/mol		AP02877	Bacteriocin	Hominicin	0.3462	Anti-Gram+ & Gram-, Anti-MRSA	9.44	0	1	29.32 stable
92	THPPSTTTTTTTTTTTTAAPATTT	24	0.13	0.25	-0.608333	2364.5	C97H162N26O42S0	0	1.82 kcal/mol		AP02877	Bacteriocin	Hominicin	0.3462	Anti-Gram+ & Gram-, Anti-MRSA	6.4	0	0	40.48 unstable
93	THPPVTTTTTTTTTTTTAAPATTT	24	0.17	0.25	-0.4	2376.56	C99H166N26O41S0	0	1.51 kcal/mol		AP02877	Bacteriocin	Hominicin	0.3462	Anti-Gram+ & Gram-, Anti-MRSA	6.4	0	0	36.95 stable
94	THPPWTTTTTTTTTTTTAAPATTT	24	0.17	0.25	-0.6125	2463.64	C105H168N27O41S0	5550	1.58 kcal/mol		AP02877	Bacteriocin	Hominicin	0.3462	Anti-Gram+ & Gram-, Anti-MRSA	6.4	0	0	25.00 stable
95	THPPYTTTTTTTTTTTTAAPATTT	24	0.13	0.25	-0.629167	2440.6	C103H166N26O42S0	1490	1.68 kcal/mol		AP02877	Bacteriocin	Hominicin	0.3462	Anti-Gram+ & Gram-, Anti-MRSA	6.4	0	0	28.92 stable
96	THPPTATTTTTTTTTTTAAPATTT	24	0.17	0.25	-0.5	2348.5	C97H162N26O41S0	0	1.6 kcal/mol		AP02877	Bacteriocin	Hominicin	0.3704	Anti-Gram+ & Gram-, Anti-MRSA	6.4	0	0	32.46 stable
97	THPPTCTTTTTTTTTTTAAPATTT	24	0.17	0.25	-0.470833	2380.57	C97H162N26O41S1	62.5	1.62 kcal/mol		AP02877	Bacteriocin	Hominicin	0.3462	Anti-Gram+ & Gram-, Anti-MRSA	6.4	0	0	46.04 unstable
98	THPPTDTTTTTTTTTTTAAPATTT	24	0.13	-0.75	-0.720833	2392.51	C98H162N26O43S0	0	2.04 kcal/mol		AP02877	Bacteriocin	Hominicin	0.3462	Anti-Gram+ & Gram-, Anti-MRSA	5.05	1	0	26.20 stable
99	THPPTETTTTTTTTTTTAAPATTT	24	0.13	-0.75	-0.720833	2406.54	C99H164N26O43S0	0	1.96 kcal/mol		AP02877	Bacteriocin	Hominicin	0.3462	Anti-Gram+ & Gram-, Anti-MRSA	5.21	1	0	40.48 unstable
100	THPPTFTTTTTTTTTTTAAPATTT	24	0.17	0.25	-0.458333	2424.6	C103H166N26O41S0	0	1.55 kcal/mol		AP02877	Bacteriocin	Hominicin	0.3704	Anti-Gram+ & Gram-, Anti-MRSA	6.4	0	0	37.60 stable
101	THPPTGTTTTTTTTTTTAAPATTT	24	0.13	0.25	-0.591667	2334.48	C96H160N26O41S0	0	1.64 kcal/mol		AP02877	Bacteriocin	Hominicin	0.3462	Anti-Gram+ & Gram-, Anti-MRSA	6.4	0	0	25.38 stable
102	THPPTHTTTTTTTTTTTAAPATTT	24	0.13	0.5	-0.708333	2414.57	C100H164N28O41S0	0	1.87 kcal/mol		AP02877	Bacteriocin	Hominicin	0.3462	Anti-Gram+ & Gram-, Anti-MRSA	6.61	0	0	29.32 stable
103	THPPTITTTTTTTTTTTAAPATTT	24	0.17	0.25	-0.3875	2390.58	C100H168N26O41S0	0	1.47 kcal/mol		AP02877	Bacteriocin	Hominicin	0.3462	Anti-Gram+ & Gram-, Anti-MRSA	6.4	0	0	32.46 stable
104	THPPTKTTTTTTTTTTTAAPATTT	24	0.13	1.25	-0.7375	2405.59	C100H169N27O41S0	0	1.91 kcal/mol		AP02877	Bacteriocin	Hominicin	0.3462	Anti-Gram+ & Gram-, Anti-MRSA	8.44	0	1	32.46 stable
105	THPPTLTTTTTTTTTTTAAPATTT	24	0.17	0.25	-0.416667	2390.58	C100H168N26O41S0	0	1.47 kcal/mol		AP02052	Bacteriocin	Sclerosin	0.3571	Anti-Gram+, Antifungal	6.4	0	0	32.46 stable
106	THPPTMTTTTTTTTTTTAAPATTT	24	0.17	0.25	-0.495833	2408.62	C99H166N26O41S1	0	1.58 kcal/mol		AP02877	Bacteriocin	Hominicin	0.3462	Anti-Gram+ & Gram-, Anti-MRSA	6.4	0	0	31.26 stable
107	THPPTNTTTTTTTTTTTAAPATTT	24	0.13	0.25	-0.720833	2391.53	C98H164N26O42S0	0	1.95 kcal/mol		AP02877	Bacteriocin	Hominicin	0.3462	Anti-Gram+ & Gram-, Anti-MRSA	6.4	0	0	22.66 stable
108	THPPTPTTTTTTTTTTTAAPATTT	24	0.13	0.25	-0.641667	2374.54	C99H164N26O41S0	0	1.68 kcal/mol		AP02877	Bacteriocin	Hominicin	0.3846	Anti-Gram+ & Gram-, Anti-MRSA	6.4	0	0	32.46 stable
109	THPPTQTTTTTTTTTTTAAPATTT	24	0.13	0.25	-0.720833	2405.55	C99H165N27O42S0	0	1.91 kcal/mol		AP02877	Bacteriocin	Hominicin	0.3462	Anti-Gram+ & Gram-, Anti-MRSA	6.4	0	0	29.32 stable
110	THPPTRTTTTTTTTTTTAAPATTT	24	0.13	1.25	-0.7625	2433.61	C100H169N29O41S0	0	2.3 kcal/mol		AP02877	Bacteriocin	Hominicin	0.3462	Anti-Gram+ & Gram-, Anti-MRSA	9.44	0	1	32.46 stable
111	THPPTSTTTTTTTTTTTAAPATTT	24	0.13	0.25	-0.608333	2364.5	C97H162N26O42S0	0	1.82 kcal/mol		AP02877	Bacteriocin	Hominicin	0.3462	Anti-Gram+ & Gram-, Anti-MRSA	6.4	0	0	32.46 stable
112	THPPTVTTTTTTTTTTTAAPATTT	24	0.17	0.25	-0.4	2376.56	C99H166N26O41S0	0	1.51 kcal/mol		AP02877	Bacteriocin	Hominicin	0.3462	Anti-Gram+ & Gram-, Anti-MRSA	6.4	0	0	28.92 stable
113	THPPTWTTTTTTTTTTTAAPATTT	24	0.17	0.25	-0.6125	2463.64	C105H168N27O41S0	5550	1.58 kcal/mol		AP02877	Bacteriocin	Hominicin	0.3462	Anti-Gram+ & Gram-, Anti-MRSA	6.4	0	0	19.93 stable
114	THPPTYTTTTTTTTTTTAAPATTT	24	0.13	0.25	-0.629167	2440.6	C103H166N26O42S0	1490	1.68 kcal/mol		AP02877	Bacteriocin	Hominicin	0.3462	Anti-Gram+ & Gram-, Anti-MRSA	6.4	0	0	28.92 stable
115	THPPTTATTTTTTTTTTAAPATTT	24	0.17	0.25	-0.5	2348.5	C97H162N26O41S0	0	1.6 kcal/mol		AP02052	Bacteriocin	Sclerosin	0.3571	Anti-Gram+, Antifungal	6.4	0	0	32.46 stable
116	THPPTTCTTTTTTTTTTAAPATTT	24	0.17	0.25	-0.470833	2380.57	C97H162N26O41S1	62.5	1.62 kcal/mol		AP02877	Bacteriocin	Hominicin	0.3462	Anti-Gram+ & Gram-, Anti-MRSA	6.4	0	0	46.04 unstable
117	THPPTTDTTTTTTTTTTAAPATTT	24	0.13	-0.75	-0.720833	2392.51	C98H162N26O43S0	0	2.04 kcal/mol		AP02877	Bacteriocin	Hominicin	0.3462	Anti-Gram+ & Gram-, Anti-MRSA	5.05	1	0	26.20 stable
118	THPPTTETTTTTTTTTTAAPATTT	24	0.13	-0.75	-0.720833	2406.54	C99H164N26O43S0	0	1.96 kcal/mol		AP02877	Bacteriocin	Hominicin	0.3462	Anti-Gram+ & Gram-, Anti-MRSA	5.21	1	0	40.48 unstable
119	THPPTTFTTTTTTTTTTAAPATTT	24	0.17	0.25	-0.458333	2424.6	C103H166N26O41S0	0	1.55 kcal/mol		AP02877	Bacteriocin	Hominicin	0.3846	Anti-Gram+ & Gram-, Anti-MRSA	6.4	0	0	37.60 stable
120	THPPTTGTTTTTTTTTTAAPATTT	24	0.13	0.25	-0.591667	2334.48	C96H160N26O41S0	0	1.64 kcal/mol		AP02877	Bacteriocin	Hominicin	0.3462	Anti-Gram+ & Gram-, Anti-MRSA	6.4	0	0	25.38 stable
121	THPPTTHTTTTTTTTTTAAPATTT	24	0.13	0.5	-0.708333	2414.57	C100H164N28O41S0	0	1.87 kcal/mol		AP02877	Bacteriocin	Hominicin	0.3462	Anti-Gram+ & Gram-, Anti-MRSA	6.61	0	0	29.32 stable
122	THPPTTITTTTTTTTTTAAPATTT	24	0.17	0.25	-0.3875	2390.58	C100H168N26O41S0	0	1.47 kcal/mol		AP02877	Bacteriocin	Hominicin	0.3462	Anti-Gram+ & Gram-, Anti-MRSA	6.4	0	0	32.46 stable
123	THPPTTKTTTTTTTTTTAAPATTT	24	0.13	1.25	-0.7375	2405.59	C100H169N27O41S0	0	1.91 kcal/mol		AP02877	Bacteriocin	Hominicin	0.3462	Anti-Gram+ & Gram-, Anti-MRSA	8.44	0	1	32.46 stable
124	THPPTTLTTTTTTTTTTAAPATTT	24	0.17	0.25	-0.416667	2390.58	C100H168N26O41S0	0	1.47 kcal/mol		AP02052	Bacteriocin	Sclerosin	0.3571	Anti-Gram+, Antifungal	6.4	0	0	32.46 stable
125	THPPTTMTTTTTTTTTTAAPATTT	24	0.17	0.25	-0.495833	2408.62	C99H166N26O41S1	0	1.58 kcal/mol		AP02877	Bacteriocin	Hominicin	0.3462	Anti-Gram+ & Gram-, Anti-MRSA	6.4	0	0	31.26 stable
126	THPPTTNTTTTTTTTTTAAPATTT	24	0.13	0.25	-0.720833	2391.53	C98H164N26O42S0	0	1.95 kcal/mol		AP02877	Bacteriocin	Hominicin	0.3462	Anti-Gram+ & Gram-, Anti-MRSA	6.4	0	0	22.66 stable
127	THPPTTPTTTTTTTTTTAAPATTT	24	0.13	0.25	-0.641667	2374.54	C99H164N26O41S0	0	1.68 kcal/mol		AP02877	Bacteriocin	Hominicin	0.3846	Anti-Gram+ & Gram-, Anti-MRSA	6.4	0	0	32.46 stable
128	THPPTTQTTTTTTTTTTAAPATTT	24	0.13	0.25	-0.720833	2405.55	C99H165N27O42S0	0	1.91 kcal/mol		AP02877	Bacteriocin	Hominicin	0.3462	Anti-Gram+ & Gram-, Anti-MRSA	6.4	0	0	29.32 stable
129	THPPTTRTTTTTTTTTTAAPATTT	24	0.13	1.25	-0.7625	2433.61	C100H169N29O41S0	0	2.3 kcal/mol		AP02877	Bacteriocin	Hominicin	0.3462	Anti-Gram+ & Gram-, Anti-MRSA	9.44	0	1	32.46 stable
130	THPPTTSTTTTTTTTTTAAPATTT	24	0.13	0.25	-0.608333	2364.5	C97H162N26O42S0	0	1.82 kcal/mol		AP02877	Bacteriocin	Hominicin	0.3462	Anti-Gram+ & Gram-, Anti-MRSA	6.4	0	0	32.46 stable
131	THPPTTVTTTTTTTTTTAAPATTT	24	0.17	0.25	-0.4	2376.56	C99H166N26O41S0	0	1.51 kcal/mol		AP02052	Bacteriocin	Sclerosin	0.3571	Anti-Gram+, Antifungal	6.4	0	0	28.92 stable
132	THPPTTWTTTTTTTTTTAAPATTT	24	0.17	0.25	-0.6125	2463.64	C105H168N27O41S0	5550	1.58 kcal/mol		AP02877	Bacteriocin	Hominicin	0.3462	Anti-Gram+ & Gram-, Anti-MRSA	6.4	0	0	19.93 stable
133	THPPTTYTTTTTTTTTTAAPATTT	24	0.13	0.25	-0.629167	2440.6	C103H166N26O42S0	1490	1.68 kcal/mol		AP02877	Bacteriocin	Hominicin	0.3462	Anti-Gram+ & Gram-, Anti-MRSA	6.4	0	0	28.92 stable
134	THPPTTTTTATTTTTTTAAPATTT	24	0.17	0.25	-0.5	2348.5	C97H162N26O41S0	0	1.6 kcal/mol		AP02877	Bacteriocin	Hominicin	0.3846	Anti-Gram+ & Gram-, Anti-MRSA	6.4	0	0	32.46 stable
135	THPPTTTTTCTTTTTTTAAPATTT	24	0.17	0.25	-0.470833	2380.57	C97H162N26O41S1	62.5	1.62 kcal/mol		AP02877	Bacteriocin	Hominicin	0.3462	Anti-Gram+ & Gram-, Anti-MRSA	6.4	0	0	46.04 unstable
136	THPPTTTTTDTTTTTTTAAPATTT	24	0.13	-0.75	-0.720833	2392.51	C98H162N26O43S0	0	2.04 kcal/mol		AP02877	Bacteriocin	Hominicin	0.3462	Anti-Gram+ & Gram-, Anti-MRSA	5.05	1	0	26.20 stable
137	THPPTTTTTETTTTTTTAAPATTT	24	0.13	-0.75	-0.720833	2406.54	C99H164N26O43S0	0	1.96 kcal/mol		AP02877	Bacteriocin	Hominicin	0.3462	Anti-Gram+ & Gram-, Anti-MRSA	5.21	1	0	40.48 unstable
138	THPPTTTTTFTTTTTTTAAPATTT	24	0.17	0.25	-0.458333	2424.6	C103H166N26O41S0	0	1.55 kcal/mol		AP02877	Bacteriocin	Hominicin	0.3462	Anti-Gram+ & Gram-, Anti-MRSA	6.4	0	0	37.60 stable
139	THPPTTTTTGTTTTTTTAAPATTT	24	0.13	0.25	-0.591667	2334.48	C96H160N26O41S0	0	1.64 kcal/mol		AP02877	Bacteriocin	Hominicin	0.3462	Anti-Gram+ & Gram-, Anti-MRSA	6.4	0	0	25.38 stable
140	THPPTTTTTHTTTTTTTAAPATTT	24	0.13	0.5	-0.708333	2414.57	C100H164N28O41S0	0	1.87 kcal/mol		AP02877	Bacteriocin	Hominicin	0.3462	Anti-Gram+ & Gram-, Anti-MRSA	6.61	0	0	29.32 stable
141	THPPTTTTTITTTTTTTAAPATTT	24	0.17	0.25	-0.3875	2390.58	C100H168N26O41S0	0	1.47 kcal/mol		AP02877	Bacteriocin	Hominicin	0.3704	Anti-Gram+ & Gram-, Anti-MRSA	6.4	0	0	32.46 stable
142	THPPTTTTTKTTTTTTTAAPATTT	24	0.13	1.25	-0.7375	2405.59	C100H169N27O41S0	0	1.91 kcal/mol		AP02877	Bacteriocin	Hominicin	0.3462	Anti-Gram+ & Gram-, Anti-MRSA	8.44	0	1	32.46 stable
143	THPPTTTTTLTTTTTTTAAPATTT	24	0.17	0.25	-0.416667	2390.58	C100H168N26O41S0	0	1.47 kcal/mol		AP02877	Bacteriocin	Hominicin	0.3462	Anti-Gram+ & Gram-, Anti-MRSA	6.4	0	0	32.46 stable
144	THPPTTTTTMTTTTTTTAAPATTT	24	0.17	0.25	-0.495833	2408.62	C99H166N26O41S1	0	1.58 kcal/mol		AP02877	Bacteriocin	Hominicin	0.3462	Anti-Gram+ & Gram-, Anti-MRSA	6.4	0	0	31.26 stable
145	THPPTTTTTNTTTTTTTAAPATTT	24	0.13	0.25	-0.720833	2391.53	C98H164N26O42S0	0	1.95 kcal/mol		AP02877	Bacteriocin	Hominicin	0.3462	Anti-Gram+ & Gram-, Anti-MRSA	6.4	0	0	22.66 stable
146	THPPTTTTTPTTTTTTTAAPATTT	24	0.13	0.25	-0.641667	2374.54	C99H164N26O41S0	0	1.68 kcal/mol		AP02877	Bacteriocin	Hominicin	0.3846	Anti-Gram+ & Gram-, Anti-MRSA	6.4	0	0	32.46 stable
		APD3														ProtParam
S.no	AMPs	Sequence length	total hydrophobic ratio%	total net charge	GRAVY	molecular weight	molecular formula	molar extinction coefficient	Protein-binding Potential			Class	Name	Similarity	Activity	Theoretical pI	negatively charged residues (Asp + Glu)	positively charged residues (Arg + Lys)	Instability index
147	THPPTTTTTQTTTTTTTAAPATTT	24	0.13	0.25	-0.721	2405.55	C99H165N27O42S0	0	1.91 kcal/mol		AP02877	Bacteriocin	Hominicin	0.3462	Anti-Gram+ & Gram-, Anti-MRSA	6.4	0	0	29.32 stable
148	THPPTTTTTRTTTTTTTAAPATTT	24	0.13	1.25	-0.7625	2433.61	C100H169N29O41S0	0	2.30 kcal/mol		AP02877	Bacteriocin	Hominicin	0.3462	Anti-Gram+ & Gram-, Anti-MRSA	9.44	0	1	32.46 stable
149	THPPTTTTTSTTTTTTTAAPATTT	24	0.13	0.25	-0.6083	2364.5	C97H162N26O42S0	0	1.82 kcal/mol		AP02877	Bacteriocin	Hominicin	0.3462	Anti-Gram+ & Gram-, Anti-MRSA	6.4	0	0	32.46 stable
150	THPPTTTTTVTTTTTTTAAPATTT	24	0.17	0.25	0.4	2376.56	C99H166N26O41S0	0	1.51 kcal/mol		AP02052	lipopeptide; bacteriocin	Sclerosin	0.3571	Anti-Gram+, Antifungal	6.4	0	0	28.92 stable
151	THPPTTTTTWTTTTTTTAAPATTT	24	0.17	0.25	-0.6125	2463.64	C105H168N27O41S0	5550	1.58 kcal/mol		AP02877	Bacteriocin	Hominicin	0.3462	Anti-Gram+ & Gram-, Anti-MRSA	6.4	0	0	19.93 stable
152	THPPTTTTTYTTTTTTTAAPATTT	24	0.13	0.25	-0.629167	2440.6	C103H166N26O42S0	1490	1.68 kcal/mol		AP02877	Bacteriocin	Hominicin	0.3462	Anti-Gram+ & Gram-, Anti-MRSA	6.4	0	0	28.92 stable
153	THPPTTTTTTATTTTTTAAPATTT	24	0.17	0.25	-0.5	2348.5	C97H162N26O41S0	0	1.60 kcal/mol		AP02877	Bacteriocin	Hominicin	0.3846	Anti-Gram+ & Gram-, Anti-MRSA	6.4	0	0	32.46 stable
154	THPPTTTTTTCTTTTTTAAPATTT	24	0.17	0.25	-0.470833	2380.57	C97H162N26O41S1	62.5	1.62 kcal/mol		AP02877	Bacteriocin	Hominicin	0.3462	Anti-Gram+ & Gram-, Anti-MRSA	6.4	0	0	46.04 unstable
155	THPPTTTTTTDTTTTTTAAPATTT	24	0.13	-0.75	-0.720833	2392.51	C98H162N26O43S0	0	2.04 kcal/mol		AP02877	Bacteriocin	Hominicin	0.3462	Anti-Gram+ & Gram-, Anti-MRSA	5.05	1	0	26.20 stable
156	THPPTTTTTTETTTTTTAAPATTT	24	0.13	-0.75	-0.720833	2406.54	C99H164N26O43S0	0	1.96 kcal/mol		AP02877	Bacteriocin	Hominicin	0.3462	Anti-Gram+ & Gram-, Anti-MRSA	5.21	1	0	40.48 unstable
157	THPPTTTTTTFTTTTTTAAPATTT	24	0.17	0.25	-0.458333	2424.6	C103H166N26O41S0	0	1.55 kcal/mol		AP02877	Bacteriocin	Hominicin	0.3462	Anti-Gram+ & Gram-, Anti-MRSA	6.4	0	0	37.60 stable
158	THPPTTTTTTGTTTTTTAAPATTT	24	0.13	0.25	-0.591667	2334.48	C96H160N26O41S0	0	1.64 kcal/mol		AP02877	Bacteriocin	Hominicin	0.3462	Anti-Gram+ & Gram-, Anti-MRSA	6.4	0	0	25.38 stable
159	THPPTTTTTTHTTTTTTAAPATTT	24	0.13	0.5	-0.708333	2414.57	C100H164N28O41S0	0	1.87 kcal/mol		AP02877	Bacteriocin	Hominicin	0.3462	Anti-Gram+ & Gram-, Anti-MRSA	6.61	0	0	29.32 stable
160	THPPTTTTTTITTTTTTAAPATTT	24	0.17	0.25	-0.3875	2390.58	C100H168N26O41S0	0	1.47 kcal/mol		AP02877	Bacteriocin	Hominicin	0.3846	Anti-Gram+ & Gram-, Anti-MRSA	6.4	0	0	32.46 stable
161	THPPTTTTTTKTTTTTTAAPATTT	24	0.13	1.25	-0.7375	2405.59	C100H169N27O41S0	0	1.91 kcal/mol		AP02877	Bacteriocin	Hominicin	0.3462	Anti-Gram+ & Gram-, Anti-MRSA	8.44	0	1	32.46 stable
162	THPPTTTTTTLTTTTTTAAPATTT	24	0.17	0.25	-0.416667	2390.58	C100H168N26O41S0	0	1.47 kcal/mol		AP02877	Bacteriocin	Hominicin	0.3462	Anti-Gram+ & Gram-, Anti-MRSA	6.4	0	0	32.46 stable
163	THPPTTTTTTMTTTTTTAAPATTT	24	0.17	0.25	-0.495833	2408.62	C99H166N26O41S1	0	1.58 kcal/mol		AP02877	Bacteriocin	Hominicin	0.3462	Anti-Gram+ & Gram-, Anti-MRSA	6.4	0	0	31.26 stable
164	THPPTTTTTTNTTTTTTAAPATTT	24	0.13	0.25	-0.720833	2391.53	C98H164N26O42S0	0	1.95 kcal/mol		AP02877	Bacteriocin	Hominicin	0.3462	Anti-Gram+ & Gram-, Anti-MRSA	6.4	0	0	22.66 stable
165	THPPTTTTTTPTTTTTTAAPATTT	24	0.13	0.25	-0.641667	2374.54	C99H164N26O41S0	0	1.68 kcal/mol		AP02877	Bacteriocin	Hominicin	0.3704	Anti-Gram+ & Gram-, Anti-MRSA	6.4	0	0	32.46 stable
166	THPPTTTTTTQTTTTTTAAPATTT	24	0.13	0.25	-0.720833	2405.55	C99H165N27O42S0	0	1.91 kcal/mol		AP02877	Bacteriocin	Hominicin	0.3462	Anti-Gram+ & Gram-, Anti-MRSA	6.4	0	0	29.32 stable
167	THPPTTTTTTRTTTTTTAAPATTT	24	0.13	1.25	-0.7625	2433.61	C100H169N29O41S0	0	2.3 kcal/mol		AP02877	Bacteriocin	Hominicin	0.3462	Anti-Gram+ & Gram-, Anti-MRSA	9.44	0	1	32.46 stable
168	THPPTTTTTTSTTTTTTAAPATTT	24	0.13	0.25	-0.608333	2364.5	C97H162N26O42S0	0	1.82 kcal/mol		AP02877	Bacteriocin	Hominicin	0.3462	Anti-Gram+ & Gram-, Anti-MRSA	6.4	0	0	32.46 stable
169	THPPTTTTTTVTTTTTTAAPATTT	24	0.17	0.25	-0.4	2376.56	C99H166N26O41S0	0	1.51 kcal/mol		AP02052	lipopeptide; bacteriocin	Sclerosin	Sclerosin	Anti-Gram+, Antifungal	6.4	0	0	28.92 stable
170	THPPTTTTTTWTTTTTTAAPATTT	24	0.17	0.25	-0.6125	2463.64	C105H168N27O41S0	5550	1.58 kcal/mol		AP02877	Bacteriocin	Hominicin	0.3462	Anti-Gram+ & Gram-, Anti-MRSA	6.4	0	0	19.93 stable
171	THPPTTTTTTYTTTTTTAAPATTT	24	0.13	0.25	-0.629167	2440.6	C103H166N26O42S0	1490	1.68 kcal/mol		AP02877	Bacteriocin	Hominicin	0.3462	Anti-Gram+ & Gram-, Anti-MRSA	6.4	0	0	28.92 stable
172	THPPTTTTTTTATTTTTAAPATTT	24	0.17	0.25	-0.5	2348.5	C97H162N26O41S0	0	1.6 kcal/mol		AP02877	Bacteriocin	Hominicin	0.3704	Anti-Gram+ & Gram-, Anti-MRSA	6.4	0	0	32.46 stable
173	THPPTTTTTTTCTTTTTAAPATTT	24	0.17	0.25	-0.470833	2380.57	C97H162N26O41S1	62.5	1.62 kcal/mol		AP02877	Bacteriocin	Hominicin	0.3462	Anti-Gram+ & Gram-, Anti-MRSA	6.4	0	0	46.04 unstable
174	THPPTTTTTTTDTTTTTAAPATTT	24	0.13	-0.75	-0.720833	2392.51	C98H162N26O43S0	0	2.04 kcal/mol		AP02877	Bacteriocin	Hominicin	0.3462	Anti-Gram+ & Gram-, Anti-MRSA	5.05	1	0	26.20 stable
175	THPPTTTTTTTETTTTTAAPATTT	24	0.13	-0.75	-0.720833	2406.54	C99H164N26O43S0	0	1.96 kcal/mol		AP02877	Bacteriocin	Hominicin	0.3462	Anti-Gram+ & Gram-, Anti-MRSA	5.21	1	0	40.48 unstable
176	THPPTTTTTTTFTTTTTAAPATTT	24	0.17	0.25	-0.458333	2424.6	C103H166N26O41S0	0	1.55 kcal/mol		AP02877	Bacteriocin	Hominicin	0.3462	Anti-Gram+ & Gram-, Anti-MRSA	6.4	0	0	37.60 stable
177	THPPTTTTTTTGTTTTTAAPATTT	24	0.13	0.25	-0.591667	2334.48	C96H160N26O41S0	0	1.64 kcal/mol		AP02877	Bacteriocin	Hominicin	0.3462	Anti-Gram+ & Gram-, Anti-MRSA	6.4	0	0	25.38 stable
178	THPPTTTTTTTHTTTTTAAPATTT	24	0.13	0.5	-0.708333	2414.57	C100H164N28O41S0	0	1.87 kcal/mol		AP02877	Bacteriocin	Hominicin	0.3462	Anti-Gram+ & Gram-, Anti-MRSA	6.61	0	0	29.32 stable
179	THPPTTTTTTTITTTTTAAPATTT	24	0.17	0.25	-0.3875	2390.58	C100H168N26O41S0	0	1.47 kcal/mol		AP02877	Bacteriocin	Hominicin	0.3846	Anti-Gram+ & Gram-, Anti-MRSA	6.4	0	0	32.46 stable
180	THPPTTTTTTTKTTTTTAAPATTT	24	0.13	1.25	-0.7375	2405.59	C100H169N27O41S0	0	1.91 kcal/mol		AP02877	Bacteriocin	Hominicin	0.3462	Anti-Gram+ & Gram-, Anti-MRSA	8.44	0	1	32.46 stable
181	THPPTTTTTTTLTTTTTAAPATTT	24	0.17	0.25	-0.416667	2390.58	C100H168N26O41S0	0	1.47 kcal/mol		AP02052	lipopeptide; bacteriocin	Sclerosin	0.3571	Anti-Gram+, Antifungal	6.4	0	0	31.46 stable
182	THPPTTTTTTTMTTTTTAAPATTT	24	0.17	0.25	-0.495833	2408.62	C99H166N26O41S1	0	1.58 kcal/mol		AP02877	Bacteriocin	Hominicin	0.3462	Anti-Gram+ & Gram-, Anti-MRSA	6.4	0	0	32.46 stable
183	THPPTTTTTTTNTTTTTAAPATTT	24	0.13	0.25	-0.720833	2391.53	C98H164N26O42S0	0	1.95 kcal/mol		AP02877	Bacteriocin	Hominicin	0.3462	Anti-Gram+ & Gram-, Anti-MRSA	6.4	0	0	22.66 stable
184	THPPTTTTTTTPTTTTTAAPATTT	24	0.13	0.25	-0.641667	2374.54	C99H164N26O41S0	0	1.68 kcal/mol		AP02877	Bacteriocin	Hominicin	0.3462	Anti-Gram+ & Gram-, Anti-MRSA	6.4	0	0	32.46 stable
185	THPPTTTTTTTQTTTTTAAPATTT	24	0.13	0.25	-0.720833	2405.55	C99H165N27O42S0	0	1.91 kcal/mol		AP02877	Bacteriocin	Hominicin	0.3462	Anti-Gram+ & Gram-, Anti-MRSA	6.4	0	0	29.32 stable
186	THPPTTTTTTTRTTTTTAAPATTT	24	0.13	1.25	-0.7625	2433.61	C100H169N29O41S0	0	2.3 kcal/mol		AP02877	Bacteriocin	Hominicin	0.3462	Anti-Gram+ & Gram-, Anti-MRSA	9.44	0	1	32.46 stable
187	THPPTTTTTTTSTTTTTAAPATTT	24	0.13	0.25	-0.608333	2364.5	C97H162N26O42S0	0	1.82 kcal/mol		AP02877	Bacteriocin	Hominicin	0.3462	Anti-Gram+ & Gram-, Anti-MRSA	6.4	0	0	32.46 stable
188	THPPTTTTTTTVTTTTTAAPATTT	24	0.17	0.25	-0.4	2376.56	C99H166N26O41S0	0	1.51 kcal/mol		AP02052	lipopeptide; bacteriocin	Sclerosin	0.3571	Anti-Gram+, Antifungal	6.4	0	0	28.92 stable
189	THPPTTTTTTTWTTTTTAAPATTT	24	0.17	0.25	-0.6125	2463.64	C105H168N27O41S0	5550	1.58 kcal/mol		AP02877	Bacteriocin	Hominicin	0.3462	Anti-Gram+ & Gram-, Anti-MRSA	6.4	0	0	19.93 stable
190	THPPTTTTTTTYTTTTTAAPATTT	24	0.13	0.25	-0.629167	2440.6	C103H166N26O42S0	1490	1.68 kcal/mol		AP02877	Bacteriocin	Hominicin	0.3462	Anti-Gram+ & Gram-, Anti-MRSA	6.4	0	0	28.92 stable
191	THPPTTTTTTTTATTTTAAPATTT	24	0.17	0.25	-0.5	2348.5	C97H162N26O41S0	0	1.6 kcal/mol		AP02877	Bacteriocin	Hominicin	0.3462	Anti-Gram+ & Gram-, Anti-MRSA	6.4	0	0	32.46 stable
192	THPPTTTTTTTTCTTTTAAPATTT	24	0.17	0.25	-0.470833	2380.57	C97H162N26O41S1	62.5	1.62 kcal/mol		AP02877	Bacteriocin	Hominicin	0.3462	Anti-Gram+ & Gram-, Anti-MRSA	6.4	0	0	46.04 unstable
193	THPPTTTTTTTTDTTTTAAPATTT	24	0.13	-0.75	-0.720833	2392.51	C98H162N26O43S0	0	2.04 kcal/mol		AP02877	Bacteriocin	Hominicin	0.3462	Anti-Gram+ & Gram-, Anti-MRSA	5.05	1	0	26.20 stable
194	THPPTTTTTTTTETTTTAAPATTT	24	0.13	-0.75	-0.720833	2406.54	C99H164N26O43S0	0	1.96 kcal/mol		AP02877	Bacteriocin	Hominicin	0.3704	Anti-Gram+ & Gram-, Anti-MRSA	5.21	1	0	40.48 unstable
195	THPPTTTTTTTTFTTTTAAPATTT	24	0.17	0.25	-0.458333	2424.6	C103H166N26O41S0	0	1.55 kcal/mol		AP02877	Bacteriocin	Hominicin	0.3462	Anti-Gram+ & Gram-, Anti-MRSA	6.4	0	0	37.60 stable
196	THPPTTTTTTTTGTTTTAAPATTT	24	0.13	0.25	-0.591667	2334.48	C96H160N26O41S0	0	1.64 kcal/mol		AP02877	Bacteriocin	Hominicin	0.3462	Anti-Gram+ & Gram-, Anti-MRSA	6.4	0	0	25.38 stable
197	THPPTTTTTTTTHTTTTAAPATTT	24	0.13	0.5	-0.708333	2414.57	C100H164N28O41S0	0	1.87 kcal/mol		AP02877	Bacteriocin	Hominicin	0.3462	Anti-Gram+ & Gram-, Anti-MRSA	6.61	0	0	29.32 stable
198	THPPTTTTTTTTITTTTAAPATTT	24	0.17	0.25	-0.3875	2390.58	C100H168N26O41S0	0	1.47 kcal/mol		AP02877	Bacteriocin	Hominicin	0.3846	Anti-Gram+ & Gram-, Anti-MRSA	6.4	0	0	32.46 stable
199	THPPTTTTTTTTKTTTTAAPATTT	24	0.13	1.25	-0.7375	2405.59	C100H169N27O41S0	0	1.91 kcal/mol		AP02877	Bacteriocin	Hominicin	0.3462	Anti-Gram+ & Gram-, Anti-MRSA	8.44	0	1	32.46 stable
200	THPPTTTTTTTTLTTTTAAPATTT	24	0.17	0.25	-0.416667	2390.58	C100H168N26O41S0	0	1.47 kcal/mol		AP02052	lipopeptide; bacteriocin	Sclerosin	0.3571	Anti-Gram+, Antifungal	6.4	0	0	32.46 stable
201	THPPTTTTTTTTMTTTTAAPATTT	24	0.17	0.25	-0.495833	2408.62	C99H166N26O41S1	0	1.58 kcal/mol		AP02877	Bacteriocin	Hominicin	0.3462	Anti-Gram+ & Gram-, Anti-MRSA	6.4	0	0	31.26 stable
202	THPPTTTTTTTTNTTTTAAPATTT	24	0.13	0.25	-0.720833	2391.53	C98H164N26O42S0	0	1.95 kcal/mol		AP02877	Bacteriocin	Hominicin	0.3462	Anti-Gram+ & Gram-, Anti-MRSA	6.4	0	0	22.66 stable
203	THPPTTTTTTTTPTTTTAAPATTT	24	0.13	0.25	-0.641667	2374.541	C99H164N26O41S0	0	1.68 kcal/mol		AP02052	lipopeptide; bacteriocin	Sclerosin	0.3571	Anti-Gram+, Antifungal	6.4	0	0	32.46 stable
204	THPPTTTTTTTTQTTTTAAPATTT	24	0.13	0.25	-0.720833	2405.55	C99H165N27O42S0	0	1.91 kcal/mol		AP02877	Bacteriocin	Hominicin	0.3462	Anti-Gram+ & Gram-, Anti-MRSA	6.4	0	0	29.32 stable
205	THPPTTTTTTTTRTTTTAAPATTT	24	0.13	1.25	-0.7625	2433.61	C100H169N29O41S0	0	2.3 kcal/mol		AP02877	Bacteriocin	Hominicin	0.3462	Anti-Gram+ & Gram-, Anti-MRSA	9.44	0	1	32.46 stable
206	THPPTTTTTTTTSTTTTAAPATTT	24	0.13	0.25	-0.608333	2364.5	C97H162N26O42S0	0	1.82 kcal/mol		AP02877	Bacteriocin	Hominicin	0.3462	Anti-Gram+ & Gram-, Anti-MRSA	6..4	0	0	32.46 stable
207	THPPTTTTTTTTVTTTTAAPATTT	24	0.17	0.25	-0.4	2376.56	C99H166N26O41S0	0	1.51 kcal/mol		AP02052	lipopeptide; bacteriocin	Sclerosin	0.3571	Anti-Gram+, Antifungal	6.4	0	0	28.92 stable
208	THPPTTTTTTTTWTTTTAAPATTT	24	0.17	0.25	-0.6125	2463.64	C105H168N27O41S0	5550	1.58 kcal/mol		AP02877	Bacteriocin	Hominicin	0.3462	Anti-Gram+ & Gram-, Anti-MRSA	6.4	0	0	19.93 stable
209	THPPTTTTTTTTYTTTTAAPATTT	24	0.13	0.25	-0.629167	2440.6	C103H166N26O42S0	1490	1.68 kcal/mol		AP02877	Bacteriocin	Hominicin	0.3462	Anti-Gram+ & Gram-, Anti-MRSA	6.4	0	0	28.92 stable
210	THPPTTTTTTTTTATTTAAPATTT	24	0.17	0.25	-0.5	2348.5	C97H162N26O41S0	0	1.6 kcal/mol		AP02877	Bacteriocin	Hominicin	0.3462	Anti-Gram+ & Gram-, Anti-MRSA	6.4	0	0	32.46 stable
211	THPPTTTTTTTTTCTTTAAPATTT	24	0.17	0.25	-0.470833	2380.57	C97H162N26O41S1	62.5	1.62 kcal/mol		AP02877	Bacteriocin	Hominicin	0.3462	Anti-Gram+ & Gram-, Anti-MRSA	6.4	0	0	46.04 unstable
212	THPPTTTTTTTTTDTTTAAPATTT	24	0.13	-0.75	-0.720833	2392.51	C98H162N26O43S0	0	2.04 kcal/mol		AP02877	Bacteriocin	Hominicin	0.3462	Anti-Gram+ & Gram-, Anti-MRSA	5.05	1	0	26.20 stable
213	THPPTTTTTTTTTETTTAAPATTT	24	0.13	-0.75	-0.720833	2406.54	C99H164N26O43S0	0	1.96 kcal/mol		AP02877	Bacteriocin	Hominicin	0.3846	Anti-Gram+ & Gram-, Anti-MRSA	5.21	1	0	40.48 unstable
214	THPPTTTTTTTTTFTTTAAPATTT	24	0.17	0.25	-0.458333	2424.6	C103H166N26O41S0	0	1.55 kcal/mol		AP02877	Bacteriocin	Hominicin	0.3462	Anti-Gram+ & Gram-, Anti-MRSA	6.4	0	0	37.60 stable
215	THPPTTTTTTTTTGTTTAAPATTT	24	0.13	0.25	-0.591667	2334.48	C96H160N26O41S0	0	1.64 kcal/mol		AP02877	Bacteriocin	Hominicin	0.3462	Anti-Gram+ & Gram-, Anti-MRSA	6.4	0	0	25.38 stable
216	THPPTTTTTTTTTHTTTAAPATTT	24	0.13	0.5	-0.708333	2414.57	C100H164N28O41S0	0	1.87 kcal/mol		AP02877	Bacteriocin	Hominicin	0.3462	Anti-Gram+ & Gram-, Anti-MRSA	6.61	0	0	29.32 stable
217	THPPTTTTTTTTTITTTAAPATTT	24	0.17	0.25	-0.3875	2390.58	C100H168N26O41S0	0	1.47 kcal/mol		AP02877	Bacteriocin	Hominicin	0.3704	Anti-Gram+ & Gram-, Anti-MRSA	6.4	0	0	32.46 stable
218	THPPTTTTTTTTTKTTTAAPATTT	24	0.13	1.25	-0.7375	2405.59	C100H169N27O41S0	0	1.91 kcal/mol		AP02877	Bacteriocin	Hominicin	0.3462	Anti-Gram+ & Gram-, Anti-MRSA	8.44	0	1	32.46 stable
219	THPPTTTTTTTTTLTTTAAPATTT	24	0.17	0.25	-0.416667	2390.58	C100H168N26O41S0	0	1.47 kcal/mol		AP02052	lipopeptide; bacteriocin	Sclerosin	0.3571	Anti-Gram+, Antifungal	6.4	0	0	32.46 stable
220	THPPTTTTTTTTTMTTTAAPATTT	24	0.17	0.25	-0.495833	2408.62	C99H166N26O41S1	0	1.58 kcal/mol		AP02877	Bacteriocin	Hominicin	0.3462	Anti-Gram+ & Gram-, Anti-MRSA	6.4	0	0	31.26 stable
221	THPPTTTTTTTTTNTTTAAPATTT	24	0.13	0.25	-0.720833	2391.53	C98H164N26O42S0	0	1.95 kcal/mol		AP02877	Bacteriocin	Hominicin	0.3462	Anti-Gram+ & Gram-, Anti-MRSA	6.4	0	0	22.66 stable
222	THPPTTTTTTTTTPTTTAAPATTT	24	0.13	0.25	-0.641667	2374.54	C99H164N26O41S0	0	1.68 kcal/mol		AP02052	lipopeptide; bacteriocin	Sclerosin	0.3571	Anti-Gram+, Antifungal	6.4	0	0	32.46 stable
223	THPPTTTTTTTTTQTTTAAPATTT	24	0.13	0.25	-0.720833	2405.55	C99H165N27O42S0	0	1.91 kcal/mol		AP02877	Bacteriocin	Hominicin	0.3462	Anti-Gram+ & Gram-, Anti-MRSA	6.4	0	0	29.32 stable
224	THPPTTTTTTTTTRTTTAAPATTT	24	0.13	1.25	-0.7625	2433.61	C100H169N29O41S0	0	2.3 kcal/mol		AP02877	Bacteriocin	Hominicin	0.3462	Anti-Gram+ & Gram-, Anti-MRSA	9.44	0	1	32.46 stable
225	THPPTTTTTTTTTSTTTAAPATTT	24	0.13	0.25	-0.608333	2364.5	C97H162N26O42S0	0	1.82 kcal/mol		AP02877	Bacteriocin	Hominicin	0.3462	Anti-Gram+ & Gram-, Anti-MRSA	6.4	0	0	32.46 stable
226	THPPTTTTTTTTTVTTTAAPATTT	24	0.17	0.25	-0.4	2376.56	C99H166N26O41S0	0	1.51 kcal/mol		AP02052	lipopeptide; bacteriocin	Sclerosin	0.3571	Anti-Gram+, Antifungal	6.4	0	0	28.92 stable
227	THPPTTTTTTTTTWTTTAAPATTT	24	0.17	0.25	-0.6125	2463.64	C105H168N27O41S0	5550	1.58 kcal/mol		AP02877	Bacteriocin	Hominicin	0.3462	Anti-Gram+ & Gram-, Anti-MRSA	6.4	0	0	19.93 stable
228	THPPTTTTTTTTTYTTTAAPATTT	24	0.13	0.25	-0.629167	2440.6	C103H166N26O42S0	1490	1.68 kcal/mol		AP02877	Bacteriocin	Hominicin	0.3462	Anti-Gram+ & Gram-, Anti-MRSA	6.4	0	0	28.92 stable
229	THPPTTTTTTTTTTATTAAPATTT	24	0.17	0.25	-0.5	2348.5	C97H162N26O41S0	0	1.6 kcal/mol		AP02877	Bacteriocin	Hominicin	0.3462	Anti-Gram+ & Gram-, Anti-MRSA	6.4	0	0	32.46 stable
230	THPPTTTTTTTTTTCTTAAPATTT	24	0.17	0.25	-0.470833	2380.57	C97H162N26O41S1	62.5	1.62 kcal/mol		AP02877	Bacteriocin	Hominicin	0.3462	Anti-Gram+ & Gram-, Anti-MRSA	6.4	0	0	46.04 unstable
231	THPPTTTTTTTTTTDTTAAPATTT	24	0.13	-0.75	-0.720833	2392.51	C98H162N26O43S0	0	2.04 kcal/mol		AP02877	Bacteriocin	Hominicin	0.3462	Anti-Gram+ & Gram-, Anti-MRSA	5.05	1	0	26.20 stable
232	THPPTTTTTTTTTTETTAAPATTT	24	0.13	-0.75	-0.720833	2406.54	C99H164N26O43S0	0	1.96 kcal/mol		AP02877	Bacteriocin	Hominicin	0.3886	Anti-Gram+ & Gram-, Anti-MRSA	5.21	1	0	40.48 unstable
233	THPPTTTTTTTTTTFTTAAPATTT	24	0.17	0.25	-0.458333	2424.6	C103H166N26O41S0	0	1.55 kcal/mol		AP02877	Bacteriocin	Hominicin	0.3462	Anti-Gram+ & Gram-, Anti-MRSA	6.4	0	0	37.60 stable
234	THPPTTTTTTTTTTGTTAAPATTT	24	0.13	0.25	-0.591667	2334.48	C96H160N26O41S0	0	1.64 kcal/mol		AP02877	Bacteriocin	Hominicin	0.3462	Anti-Gram+ & Gram-, Anti-MRSA	6.4	0	0	25.38 stable
235	THPPTTTTTTTTTTHTTAAPATTT	24	0.13	0.5	-0.708333	2414.57	C100H164N28O41S0	0	1.87 kcal/mol		AP02877	Bacteriocin	Hominicin	0.3462	Anti-Gram+ & Gram-, Anti-MRSA	6.61	0	0	29.32 stable
236	THPPTTTTTTTTTTITTAAPATTT	24	0.17	0.25	-0.3875	2390.58	C100H168N26O41S0	0	1.47 kcal/mol		AP02877	Bacteriocin	Hominicin	0.3886	Anti-Gram+ & Gram-, Anti-MRSA	6.4	0	0	32.46 stable
237	THPPTTTTTTTTTTKTTAAPATTT	24	0.13	1.25	-0.7375	2405.59	C100H169N27O41S0	0	1.91 kcal/mol		AP02877	Bacteriocin	Hominicin	0.3462	Anti-Gram+ & Gram-, Anti-MRSA	8.44	0	1	32.46 stable
238	THPPTTTTTTTTTTLTTAAPATTT	24	0.17	0.25	-0.416667	2390.58	C100H168N26O41S0	0	1.47 kcal/mol		AP02052	lipopeptide; bacteriocin	Sclerosin	0.3571	Anti-Gram+, Antifungal	6.4	0	0	32.46 stable
239	THPPTTTTTTTTTTMTTAAPATTT	24	0.17	0.25	-0.495833	2408.62	C99H166N26O41S1	0	1.58 kcal/mol		AP02877	Bacteriocin	Hominicin	0.3462	Anti-Gram+ & Gram-, Anti-MRSA	6.4	0	0	31.26 stable
240	THPPTTTTTTTTTTNTTAAPATTT	24	0.13	0.25	-0.720833	2391.53	C98H164N26O42S0	0	1.95 kcal/mol		AP02877	Bacteriocin	Hominicin	0.3462	Anti-Gram+ & Gram-, Anti-MRSA	6.4	0	0	22.66 stable
241	THPPTTTTTTTTTTPTTAAPATTT	24	0.13	0.25	-0.641667	2374.54	C99H164N26O41S0	0	1.68 kcal/mol		AP02052	lipopeptide; bacteriocin	Sclerosin	0.3571	Anti-Gram+, Antifungal	6.4	0	0	32.46 stable
242	THPPTTTTTTTTTTQTTAAPATTT	24	0.13	0.25	-0.720833	2405.55	C99H165N27O42S0	0	1.91 kcal/mol		AP02877	Bacteriocin	Hominicin	0.3462	Anti-Gram+ & Gram-, Anti-MRSA	6.4	0	0	29.32 stable
243	THPPTTTTTTTTTTRTTAAPATTT	24	0.13	1.25	-0.7625	2433.61	C100H169N29O41S0	0	2.3 kcal/mol		AP02877	Bacteriocin	Hominicin	0.3462	Anti-Gram+ & Gram-, Anti-MRSA	9.44	0	1	32.46 stable
244	THPPTTTTTTTTTTSTTAAPATTT	24	0.13	0.25	-0.608333	2364.5	C97H162N26O42S0	0	1.82 kcal/mol		AP02877	Bacteriocin	Hominicin	0.3462	Anti-Gram+ & Gram-, Anti-MRSA	6.4	0	0	32.46 stable
245	THPPTTTTTTTTTTVTTAAPATTT	24	0.17	0.25	-0.4	2376.56	C99H166N26O41S0	0	1.51 kcal/mol		AP02052	lipopeptide; bacteriocin	Sclerosin	0.3571	Anti-Gram+, Antifungal	6.4	0	0	28.92 stable
246	THPPTTTTTTTTTTWTTAAPATTT	24	0.17	0.25	-0.6125	2463.64	C105H168N27O41S0	5550	1.58 kcal/mol		AP02877	Bacteriocin	Hominicin	0.3462	Anti-Gram+ & Gram-, Anti-MRSA	6.4	0	0	19.93 stable
247	THPPTTTTTTTTTTYTTAAPATTT	24	0.13	0.25	-0.629167	2440.6	C103H166N26O42S0	1490	1.68 kcal/mol		AP02877	Bacteriocin	Hominicin	0.3462	Anti-Gram+ & Gram-, Anti-MRSA	6.4	0	0	28.92 stable
248	THPPTTTTTTTTTTTATAAPATTT	24	0.17	0.25	-0.5	2348.5	C97H162N26O41S0	0	1.6 kcal/mol		AP02877	Bacteriocin	Hominicin	0.3462	Anti-Gram+ & Gram-, Anti-MRSA	6.4	0	0	32.46 stable
249	THPPTTTTTTTTTTTCTAAPATTT	24	0.17	0.25	-0.470833	2380.57	C97H162N26O41S1	62.5	1.62 kcal/mol		AP02877	Bacteriocin	Hominicin	0.3462	Anti-Gram+ & Gram-, Anti-MRSA	6.4	0	0	46.04 unstable
250	THPPTTTTTTTTTTTDTAAPATTT	24	0.13	-0.75	-0.720833	2392.51	C98H162N26O43S0	0	2.04 kcal/mol		AP02877	Bacteriocin	Hominicin	0.3462	Anti-Gram+ & Gram-, Anti-MRSA	5.05	1	0	26.20 stable
251	THPPTTTTTTTTTTTETAAPATTT	24	0.13	-0.75	-0.720833	2406.54	C99H164N26O43S0	0	1.96 kcal/mol		AP02877	Bacteriocin	Hominicin	0.3704	Anti-Gram+ & Gram-, Anti-MRSA	5.21	1	0	40.48 unstable
252	THPPTTTTTTTTTTTFTAAPATTT	24	0.17	0.25	-0.458333	2424.6	C103H166N26O41S0	0	1.55 kcal/mol		AP02877	Bacteriocin	Hominicin	0.3462	Anti-Gram+ & Gram-, Anti-MRSA	6.4	0	0	37.60 stable
253	THPPTTTTTTTTTTTGTAAPATTT	24	0.13	0.25	-0.591667	2334.48	C96H160N26O41S0	0	1.64 kcal/mol		AP02877	Bacteriocin	Hominicin	0.3462	Anti-Gram+ & Gram-, Anti-MRSA	6.4	0	0	25.38 stable
254	THPPTTTTTTTTTTTHTAAPATTT	24	0.13	0.5	-0.708333	2414.57	C100H164N28O41S0	0	1.87 kcal/mol		AP02877	Bacteriocin	Hominicin	0.3462	Anti-Gram+ & Gram-, Anti-MRSA	6.61	0	0	29.32 stable
255	THPPTTTTTTTTTTTITAAPATTT	24	0.17	0.25	-0.3875	2390.58	C100H168N26O41S0	0	1.47 kcal/mol		AP02877	Bacteriocin	Hominicin	0.3846	Anti-Gram+ & Gram-, Anti-MRSA	6.4	0	0	32.46 stable
256	THPPTTTTTTTTTTTKTAAPATTT	24	0.13	1.25	-0.7375	2405.59	C100H169N27O41S0	0	1.91 kcal/mol		AP02877	Bacteriocin	Hominicin	0.3462	Anti-Gram+ & Gram-, Anti-MRSA	8.44	0	1	32.46 stable
257	THPPTTTTTTTTTTTLTAAPATTT	24	0.17	0.25	-0.416667	2390.58	C100H168N26O41S0	0	1.47 kcal/mol		AP02052	lipopeptide; bacteriocin	Sclerosin	0.3571	Anti-Gram+, Antifungal	6.4	0	0	32.46 stable
258	THPPTTTTTTTTTTTMTAAPATTT	24	0.17	0.25	-0.495833	2408.62	C99H166N26O41S1	0	1.58 kcal/mol		AP02877	Bacteriocin	Hominicin	0.3462	Anti-Gram+ & Gram-, Anti-MRSA	6.4	0	0	31.26 stable
259	THPPTTTTTTTTTTTNTAAPATTT	24	0.13	0.25	-0.720833	2391.53	C98H164N26O42S0	0	1.95 kcal/mol		AP02877	Bacteriocin	Hominicin	0.3462	Anti-Gram+ & Gram-, Anti-MRSA	6.4	0	0	22.66 stable
260	THPPTTTTTTTTTTTPTAAPATTT	24	0.13	0.25	-0.641667	2374.54	C99H164N26O41S0	0	1.68 kcal/mol		AP02052	lipopeptide; bacteriocin	Sclerosin	0.3571	Anti-Gram+, Antifungal	6.4	0	0	32.46 stable
261	THPPTTTTTTTTTTTQTAAPATTT	24	0.13	0.25	-0.720833	2405.55	C99H165N27O42S0	0	1.91 kcal/mol		AP02877	Bacteriocin	Hominicin	0.3462	Anti-Gram+ & Gram-, Anti-MRSA	6.4	0	0	29.32stable
262	THPPTTTTTTTTTTTRTAAPATTT	24	0.13	1.25	-0.7625	2433.61	C100H169N29O41S0	0	2.3 kcal/mol		AP02877	Bacteriocin	Hominicin	0.3462	Anti-Gram+ & Gram-, Anti-MRSA	9.44	0	1	32.46 stable
263	THPPTTTTTTTTTTTSTAAPATTT	24	0.13	0.25	-0.608333	2364.5	C97H162N26O42S0	0	1.82 kcal/mol		AP02877	Bacteriocin	Hominicin	0.3462	Anti-Gram+ & Gram-, Anti-MRSA	6.4	0	0	32.46 stable
264	THPPTTTTTTTTTTTVTAAPATTT	24	0.17	0.25	-0.4	2376.56	C99H166N26O41S0	0	1.51 kcal/mol		AP02877	Bacteriocin	Hominicin	0.3462	Anti-Gram+ & Gram-, Anti-MRSA	6.4	0	0	28.92 stable
265	THPPTTTTTTTTTTTWTAAPATTT	24	0.17	0.25	-0.6125	2463.64	C105H168N27O41S0	5550	1.58 kcal/mol		AP02877	Bacteriocin	Hominicin	0.3462	Anti-Gram+ & Gram-, Anti-MRSA	6.4	0	0	19.93 stable
266	THPPTTTTTTTTTTTYTAAPATTT	24	0.13	0.25	-0.629167	2440.6	C103H166N26O42S0	1490	1.68 kcal/mol		AP02877	Bacteriocin	Hominicin	0.3462	Anti-Gram+ & Gram-, Anti-MRSA	6.4	0	0	28.92 stable
267	THPPTTTTTTTTTTTTAAAPATTT	24	0.17	0.25	-0.5	2348.5	C97H162N26O41S0	0	1.6 kcal/mol		AP02877	Bacteriocin	Hominicin	0.36	Anti-Gram+ & Gram-, Anti-MRSA	6.4	0	0	32.46 stable
268	THPPTTTTTTTTTTTTCAAPATTT	24	0.17	0.25	-0.470833	2380.57	C97H162N26O41S1	62.5	1.62 kcal/mol		AP02877	Bacteriocin	Hominicin	0.3462	Anti-Gram+ & Gram-, Anti-MRSA	6.4	0	0	32.46 stable
269	THPPTTTTTTTTTTTTDAAPATTT	24	0.13	-0.75	-0.720833	2392.51	C98H162N26O43S0	0	2.04 kcal/mol		AP02877	Bacteriocin	Hominicin	0.3462	Anti-Gram+ & Gram-, Anti-MRSA	5.05	1	0	32.46 stable
270	THPPTTTTTTTTTTTTEAAPATTT	24	0.13	-0.75	-0.720833	2406.54	C99H164N26O43S0	0	1.96 kcal/mol		AP02877	Bacteriocin	Hominicin	0.3462	Anti-Gram+ & Gram-, Anti-MRSA	5.21	1	0	40.48 unstable
271	THPPTTTTTTTTTTTTFAAPATTT	24	0.17	0.25	-0.458333	2424.6	C103H166N26O41S0	0	1.55 kcal/mol		AP02877	Bacteriocin	Hominicin	0.3462	Anti-Gram+ & Gram-, Anti-MRSA	6.4	0	0	37.60 stable
272	THPPTTTTTTTTTTTTGAAPATTT	24	0.13	0.25	-0.591667	2334.48	C96H160N26O41S0	0	1.64 kcal/mol		AP02877	Bacteriocin	Hominicin	0.3462	Anti-Gram+ & Gram-, Anti-MRSA	6.4	0	0	25.38 stable
273	THPPTTTTTTTTTTTTHAAPATTT	24	0.13	0.5	-0.708333	2414.57	C100H164N28O41S0	0	1.87 kcal/mol		AP02877	Bacteriocin	Hominicin	0.3462	Anti-Gram+ & Gram-, Anti-MRSA	6.61	0	0	32.46 stable
274	THPPTTTTTTTTTTTTIAAPATTT	24	0.17	0.25	-0.3875	2390.58	C100H168N26O41S0	0	1.47 kcal/mol		AP02877	Bacteriocin	Hominicin	0.3462	Anti-Gram+ & Gram-, Anti-MRSA	6.4	0	0	32.46 stable
275	THPPTTTTTTTTTTTTKAAPATTT	24	0.13	1.25	-0.7375	2405.59	C100H169N27O41S0	0	1.91 kcal/mol		AP02877	Bacteriocin	Hominicin	0.3462	Anti-Gram+ & Gram-, Anti-MRSA	8.44	0	1	32.46 stable
276	THPPTTTTTTTTTTTTLAAPATTT	24	0.17	0.25	-0.416667	2390.58	C100H168N26O41S0	0	1.47 kcal/mol		AP02877	Bacteriocin	Hominicin	0.3462	Anti-Gram+ & Gram-, Anti-MRSA	6.4	0	0	32.46 stable
277	THPPTTTTTTTTTTTTMAAPATTT	24	0.17	0.25	-0.495833	2408.62	C99H166N26O41S1	0	1.58 kcal/mol		AP02877	Bacteriocin	Hominicin	0.3462	Anti-Gram+ & Gram-, Anti-MRSA	6.4	0	0	37.60 stable
278	THPPTTTTTTTTTTTTNAAPATTT	24	0.13	0.25	-0.720833	2391.53	C98H164N26O42S0	0	1.95 kcal/mol		AP02877	Bacteriocin	Hominicin	0.3462	Anti-Gram+ & Gram-, Anti-MRSA	6.4	0	0	26.20 stable
279	THPPTTTTTTTTTTTTPAAPATTT	24	0.13	0.25	-0.641667	2374.54	C99H164N26O41S0	0	1.68 kcal/mol		AP02052	lipopeptide; bacteriocin	Sclerosin	0.3571	Anti-Gram+, Antifungal	6.4	0	0	40.48 unstable
280	THPPTTTTTTTTTTTTQAAPATTT	24	0.13	0.25	-0.720833	2405.55	C99H165N27O42S0	0	1.91 kcal/mol		AP02877	Bacteriocin	Hominicin	0.3462	Anti-Gram+ & Gram-, Anti-MRSA	6.4	0	0	29.32 stable
281	THPPTTTTTTTTTTTTRAAPATTT	24	0.13	0.25	-0.7625	2433.61	C100H169N29O41S0	0	2.3 kcal/mol		AP02877	Bacteriocin	Hominicin	0.3462	Anti-Gram+ & Gram-, Anti-MRSA	9.44	0	1	32.46 stable
282	THPPTTTTTTTTTTTTSAAPATTT	24	0.13	0.25	-0.608333	2364.5	C97H162N26O42S0	0	1.82 kcal/mol		AP02877	Bacteriocin	Hominicin	0.3462	Anti-Gram+ & Gram-, Anti-MRSA	6.4	0	0	32.46 stable
283	THPPTTTTTTTTTTTTVAAPATTT	24	0.17	0.25	-0.4	2376.56	C99H166N26O41S0	0	1.51 kcal/mol		AP02877	Bacteriosin	Hominicin	0.3462	Anti-Gram+ & Gram-, Anti-MRSA	6.4	0	0	32.46 stable	THPPTTTTTTTTTTTTVAAPATTT
284	THPPTTTTTTTTTTTTWAAPATTT	24	0.17	0.25	-0.6125	2463.64	C105H168N27O41S0	5550	1.58 kcal/mol		AP02877	Bacteriosin	Hominicin	0.3462	Anti-Gram+ & Gram-, Anti-MRSA	6.4	0	0	19.93 stable	THPPTTTTTTTTTTTTWAAPATTT
285	THPPTTTTTTTTTTTTYAAPATTT	24	0.13	0.25	-0.629167	2440.6	C103H166N26O42S0	1490	1.68 kcal/mol		AP02877	Bacteriosin	Hominicin	0.3462	Anti-Gram+ & Gram-, Anti-MRSA	6.4	0	0	42.33 unstable	THPPTTTTTTTTTTTTYAAPATTT
286	THPPTTTTTTTTTTTTTCAPATTT	24	0.13	0.25	-0.575	2410.59	C98H164N26O42S1	62.5	1.81 kcal/mol		AP02877	Bacteriosin	Hominicin	0.32	Anti-Gram+ & Gram-, Anti-MRSA	6.4	0	0	32.46 stable	THPPTTTTTTTTTTTTTCAPATTT
287	THPPTTTTTTTTTTTTTDAPATTT	24	0.08	-0.75	-0.825	2422.54	C99H164N26O44S0	0	2.22 kcal/mol		AP02877	Bacteriosin	Hominicin	0.32	Anti-Gram+ & Gram-, Anti-MRSA	5.05	1	0	32.46 stable	THPPTTTTTTTTTTTTTDAPATTT
288	THPPTTTTTTTTTTTTTEAPATTT	24	0.08	-0.75	-0.825	2436.57	C100H166N26O44S0	0	2.14 kcal/mol		AP02877	Bacteriosin	Hominicin	0.32	Anti-Gram+ & Gram-, Anti-MRSA	5.21	1	0	40.48 unstable	THPPTTTTTTTTTTTTTEAPATTT
289	THPPTTTTTTTTTTTTTFAPATTT	24	0.13	0.25	-0.5625	2454.63	C104H168N26O42S0	0	1.73 kcal/mol		AP02877	Bacteriosin	Hominicin	0.32	Anti-Gram+ & Gram-, Anti-MRSA	6.4	0	0	37.6 stable	THPPTTTTTTTTTTTTTFAPATTT
290	THPPTTTTTTTTTTTTTGAPATTT	24	0.08	0.25	-0.695833	2364.5	C97H162N26O42S0	0	1.82 kcal/mol		AP03281	lipopeptide	Medipeptin A	0.3214	Anti-Gram+ & Gram-	6.4	0	0	25.38 stable	THPPTTTTTTTTTTTTTGAPATTT
291	THPPTTTTTTTTTTTTTHAPATTT	24	0.08	0.5	-0.8125	2444.59	C101H166N28O42S0	0	2.05 kcal/mol		AP02877	Bacteriosin	Hominicin	0.32	Anti-Gram+ & Gram-, Anti-MRSA	6.61	0	0	32.46 stable	THPPTTTTTTTTTTTTTHAPATTT
292	THPPTTTTTTTTTTTTTIAPATTT	24	0.13	0.25	-0.491667	2420.61	C101H170N26O42S0	0	1.65 kcal/mol		AP02877	Bacteriosin	Hominicin	0.32	Anti-Gram+ & Gram-, Anti-MRSA	6.4	0	0	32.46 stable	THPPTTTTTTTTTTTTTIAPATTT
293	THPPTTTTTTTTTTTTTKAPATTT	24	0.08	1.25	-0.841667	2435.62	C101H171N27O42S0	0	2.09 kcal/mol		AP02877	Bacteriosin	Hominicin	0.32	Anti-Gram+ & Gram-, Anti-MRSA	8.44	0	1	32.46 stable	THPPTTTTTTTTTTTTTKAPATTT
294	THPPTTTTTTTTTTTTTLAPATTT	24	0.13	0.25	-0.520833	2420.61	C101H170N26O42S0	0	1.65 kcal/mol		AP02877	Bacteriosin	Hominicin	0.32	Anti-Gram+ & Gram-, Anti-MRSA	6.4	0	0	32.46 stable	THPPTTTTTTTTTTTTTLAPATTT
295	THPPTTTTTTTTTTTTTMAPATTT	24	0.13	0.25	-0.6	2438.65	C100H168N26O42S1	0	1.76 kcal/mol		AP02877	Bacteriosin	Hominicin	0.32	Anti-Gram+ & Gram-, Anti-MRSA	6.4	0	0	37.6 stable	THPPTTTTTTTTTTTTTMAPATTT
296	THPPTTTTTTTTTTTTTNAPATTT	24	0.08	0.25	-0.825	2421.55	C99H166N26O43S0	0	2.14 kcal/mol		AP02877	Bacteriosin	Hominicin	0.32	Anti-Gram+ & Gram-, Anti-MRSA	6.4	0	0	26.2 stable	THPPTTTTTTTTTTTTTNAPATTT
297	THPPTTTTTTTTTTTTTPAPATTT	24	0.08	0.25	-0.745833	2404.57	C100H166N26O42S0	0	1.86 kcal/mol		AP02052	lipopeptide	Sclerosin	0.3214	Anti-Gram+, Antifungal	6.4	0	0	40.48 unstable	THPPTTTTTTTTTTTTTPAPATTT
298	THPPTTTTTTTTTTTTTQAPATTT	24	0.08	0.25	-0.825	2435.58	C100H167N27O43S0	0	2.09 kcal/mol		AP02877	Bacteriosin	Hominicin	0.32	Anti-Gram+ & Gram-, Anti-MRSA	6.4	0	0	29.32 stable	THPPTTTTTTTTTTTTTQAPATTT
299	THPPTTTTTTTTTTTTTRAPATTT	24	0.08	1.25	-0.866667	2463.64	C101H171N29O42S0	0	2.48 kcal/mol		AP02877	Bacteriosin	Hominicin	0.32	Anti-Gram+ & Gram-, Anti-MRSA	9.44	0	1	32.46 stable	THPPTTTTTTTTTTTTTRAPATTT
300	THPPTTTTTTTTTTTTTSAPATTT	24	0.08	0.25	-0.7125	2394.53	C98H164N26O43S0	0	2 kcal/mol		AP02877	Bacteriosin	Hominicin	0.32	Anti-Gram+ & Gram-, Anti-MRSA	6.4	0	0	32.46 stable	THPPTTTTTTTTTTTTTSAPATTT
301	THPPTTTTTTTTTTTTTTAPATTT	24	0.08	0.25	-0.708333	2408.55	C99H166N26O43S0	0	1.97 kcal/mol		AP02877	Bacteriosin	Hominicin	0.32	Anti-Gram+ & Gram-, Anti-MRSA	6.4	0	0	32.46 stable	THPPTTTTTTTTTTTTTTAPATTT
302	THPPTTTTTTTTTTTTTVAPATTT	24	0.13	0.25	-0.504167	2406.58	C100H168N26O42S0	0	1.69 kcal/mol		AP02877	Bacteriosin	Hominicin	0.32	Anti-Gram+ & Gram-, Anti-MRSA	6.4	0	0	32.46 stable	THPPTTTTTTTTTTTTTVAPATTT
303	THPPTTTTTTTTTTTTTWAPATTT	24	0.13	0.25	-0.716667	2493.66	C106H170N27O42S0	5550	1.76 kcal/mol		AP02877	Bacteriosin	Hominicin	0.32	Anti-Gram+ & Gram-, Anti-MRSA	6.4	0	0	19.93 stable	THPPTTTTTTTTTTTTTWAPATTT
304	THPPTTTTTTTTTTTTTYAPATTT	24	0.08	0.25	-0.733333	2470.63	C104H168N26O43S0	1490	1.86 kcal/mol		AP02877	Bacteriosin	Hominicin	0.32	Anti-Gram+ & Gram-, Anti-MRSA	6.4	0	0	42.33 unstable	THPPTTTTTTTTTTTTTYAPATTT
305	THPPTTTTTTTTTTTTTACPATTT	24	0.13	0.25	-0.575	2410.59	C98H164N26O42S1	62.5	1.81 kcal/mol		AP02877	Bacteriosin	Hominicin	0.32	Anti-Gram+ & Gram-, Anti-MRSA	6.4	0	0	50.77 unstable	THPPTTTTTTTTTTTTTACPATTT
306	THPPTTTTTTTTTTTTTADPATTT	24	0.08	-0.75	-0.825	2422.54	C99H164N26O44S0	0	2.22 kcal/mol		AP02877	Bacteriosin	Hominicin	0.32	Anti-Gram+ & Gram-, Anti-MRSA	5.05	1	0	20.9 stable	THPPTTTTTTTTTTTTTADPATTT
307	THPPTTTTTTTTTTTTTAEPATTT	24	0.08	-0.75	-0.825	2436.57	C100H166N26O44S0	0	2.14 kcal/mol		AP02877	Bacteriosin	Hominicin	0.32	Anti-Gram+ & Gram-, Anti-MRSA	5.21	1	0	32.46 stable	THPPTTTTTTTTTTTTTAEPATTT
308	THPPTTTTTTTTTTTTTAFPATTT	24	0.13	0.25	-0.5625	2454.63	C104H168N26O42S0	0	1.73 kcal/mol		AP02877	Bacteriosin	Hominicin	0.32	Anti-Gram+ & Gram-, Anti-MRSA	6.4	0	0	32.46 stable	THPPTTTTTTTTTTTTTAFPATTT
309	THPPTTTTTTTTTTTTTAGPATTT	24	0.08	0.25	-0.695833	2364.5	C97H162N26O42S0	0	1.82 kcal/mol		AP02877	Bacteriosin	Hominicin	0.32	Anti-Gram+ & Gram-, Anti-MRSA	6.4	0	0	24.43 stable	THPPTTTTTTTTTTTTTAGPATTT
310	THPPTTTTTTTTTTTTTAHPATTT	24	0.08	0.5	-0.8125	2444.59	C101H166N28O42S0	0	2.05 kcal/mol		AP02877	Bacteriosin	Hominicin	0.32	Anti-Gram+ & Gram-, Anti-MRSA	6.61	0	0	19.7 stable	THPPTTTTTTTTTTTTTAHPATTT
311	THPPTTTTTTTTTTTTTAIPATTT	24	0.13	0.25	-0.491667	2420.61	C101H170N26O42S0	0	1.65 kcal/mol		AP02877	Bacteriosin	Hominicin	0.3462	Anti-Gram+ & Gram-, Anti-MRSA	6.4	0	0	23.23 stable	THPPTTTTTTTTTTTTTAIPATTT
312	THPPTTTTTTTTTTTTTAKPATTT	24	0.08	1.25	-0.841667	2435.62	C101H171N27O42S0	0	2.09 kcal/mol		AP02877	Bacteriosin	Hominicin	0.32	Anti-Gram+ & Gram-, Anti-MRSA	8.44	0	1	21.29 stable	THPPTTTTTTTTTTTTTAKPATTT
313	THPPTTTTTTTTTTTTTALPATTT	24	0.13	0.25	-0.520833	2420.61	C101H170N26O42S0	0	1.65 kcal/mol		AP02877	Bacteriosin	Hominicin	0.32	Anti-Gram+ & Gram-, Anti-MRSA	6.4	0	0	32.46 stable	THPPTTTTTTTTTTTTTALPATTT
314	THPPTTTTTTTTTTTTTAMPATTT	24	0.13	0.25	-0.6	2438.65	C100H168N26O42S1	0	1.76 kcal/mol		AP02877	Bacteriosin	Hominicin	0.32	Anti-Gram+ & Gram-, Anti-MRSA	6.4	0	0	42.74 unstable	THPPTTTTTTTTTTTTTAMPATTT
315	THPPTTTTTTTTTTTTTANPATTT	24	0.08	0.25	-0.825	2421.55	C99H166N26O43S0	0	2.14 kcal/mol		AP02877	Bacteriosin	Hominicin	0.32	Anti-Gram+ & Gram-, Anti-MRSA	6.4	0	0	23.23 stable	THPPTTTTTTTTTTTTTANPATTT
316	THPPTTTTTTTTTTTTTAPPATTT	24	0.08	0.25	-0.745833	2404.57	C100H166N26O42S0	0	1.86 kcal/mol		AP02877	Bacteriosin	Hominicin	0.32	Anti-Gram+ & Gram-, Anti-MRSA	6.4	0	0	40.48 unstable	THPPTTTTTTTTTTTTTAPPATTT
317	THPPTTTTTTTTTTTTTAQPATTT	24	0.08	0.25	-0.825	2435.58	C100H167N27O43S0	0	2.09 kcal/mol		AP02877	Bacteriosin	Hominicin	0.32	Anti-Gram+ & Gram-, Anti-MRSA	6.4	0	0	32.46 stable	THPPTTTTTTTTTTTTTAQPATTT
318	THPPTTTTTTTTTTTTTARPATTT	24	0.08	1.25	-0.866667	2463.64	C101H171N29O42S0	0	2.48 kcal/mol		AP02877	Bacteriosin	Hominicin	0.32	Anti-Gram+ & Gram-, Anti-MRSA	9.44	0	1	32.46 stable	THPPTTTTTTTTTTTTTARPATTT
319	THPPTTTTTTTTTTTTTASPATTT	24	0.08	0.25	-0.7125	2394.53	C98H164N26O43S0	0	2 kcal/mol		AP02877	Bacteriosin	Hominicin	0.32	Anti-Gram+ & Gram-, Anti-MRSA	6.4	0	0	42.74 unstable	THPPTTTTTTTTTTTTTASPATTT
320	THPPTTTTTTTTTTTTTATPATTT	24	0.08	0.25	0.708333	2408.55	C99H166N26O43S0	0	1.97 kcal/mol		AP02877	Bacteriosin	Hominicin	0.32	Anti-Gram+ & Gram-, Anti-MRSA	6.4	0	0	24.43 stable	THPPTTTTTTTTTTTTTATPATTT
321	THPPTTTTTTTTTTTTTAVPATTT	24	0.13	0.25	-0.504167	2406.58	C100H168N26O42S0	0	1.69 kcal/mol		AP02877	Bacteriosin	Hominicin	0.36	Anti-Gram+ & Gram-, Anti-MRSA	6.4	0	0	32.46 stable	THPPTTTTTTTTTTTTTAVPATTT
322	THPPTTTTTTTTTTTTTAWPATTT	24	0.13	0.25	-0.716667	2493.66	C106H170N27O42S0	5550	1.76 kcal/mol		AP02877	Bacteriosin	Hominicin	0.32	Anti-Gram+ & Gram-, Anti-MRSA	6.4	0	0	24.43 stable	THPPTTTTTTTTTTTTTAWPATTT
323	THPPTTTTTTTTTTTTTAYPATTT	24	0.08	0.25	-0.733333	2470.63	C104H168N26O43S0	1490	1.86 kcal/mol		AP02877	Bacteriosin	Hominicin	0.32	Anti-Gram+ & Gram-, Anti-MRSA	6.4	0	0	29.58 stable	THPPTTTTTTTTTTTTTAYPATTT
324	THPPTTTTTTTTTTTTTAAAATTT	24	0.17	0.25	-0.4625	2352.49	C96H162N26O42S0	0	1.71 kcal/mol		AP02877	Bacteriosin	Hominicin	0.3462	Anti-Gram+ & Gram-, Anti-MRSA	6.4	0	0	16.41 stable	THPPTTTTTTTTTTTTTAAAATTT
325	THPPTTTTTTTTTTTTTAACATTT	24	0.17	0.25	-0.433333	2384.56	C96H162N26O42S1	62.5	1.73 kcal/mol		AP02877	Bacteriosin	Hominicin	0.3462	Anti-Gram+ & Gram-, Anti-MRSA	6.4	0	0	34.72 stable	THPPTTTTTTTTTTTTTAACATTT
326	THPPTTTTTTTTTTTTTAADATTT	24	0.13	-0.75	-0.683333	2396.5	C97H162N26O44S0	0	2.15 kcal/mol		AP02877	Bacteriosin	Hominicin	0.3462	Anti-Gram+ & Gram-, Anti-MRSA	5.05	1	0	12.87 stable	THPPTTTTTTTTTTTTTAADATTT
327	THPPTTTTTTTTTTTTTAAEATTT	24	0.13	-0.75	-0.683333	2410.53	C98H164N26O44S0	0	2.07 kcal/mol		AP02877	Bacteriosin	Hominicin	0.3462	Anti-Gram+ & Gram-, Anti-MRSA	5.21	1	0	16.41 stable	THPPTTTTTTTTTTTTTAAEATTT
328	THPPTTTTTTTTTTTTTAAFATTT	24	0.17	0.25	-0.420833	2428.59	C102H166N26O42S0	0	1.66 kcal/mol		AP02877	Bacteriosin	Hominicin	0.3462	Anti-Gram+ & Gram-, Anti-MRSA	6.4	0	0	16.41 stable	THPPTTTTTTTTTTTTTAAFATTT
329	THPPTTTTTTTTTTTTTAAGATTT	24	0.13	0.25	-0.554167	2338.46	C95H160N26O42S0	0	1.74 kcal/mol		AP02877	Bacteriosin	Hominicin	0.3462	Anti-Gram+ & Gram-, Anti-MRSA	6.4	0	0	12.87 stable	THPPTTTTTTTTTTTTTAAGATTT
330	THPPTTTTTTTTTTTTTAAHATTT	24	0.13	0.5	-0.670833	2418.55	C99H164N28O42S0	0	1.98 kcal/mol		AP02877	Bacteriosin	Hominicin	0.3462	Anti-Gram+ & Gram-, Anti-MRSA	6.61	0	0	12.87 stable	THPPTTTTTTTTTTTTTAAHATTT
331	THPPTTTTTTTTTTTTTAAIATTT	24	0.17	0.25	-0.35	2394.57	C99H168N26O42S0	0	1.58 kcal/mol		AP02877	Bacteriosin	Hominicin	0.3846	Anti-Gram+ & Gram-, Anti-MRSA	6.4	0	0	16.41 stable	THPPTTTTTTTTTTTTTAAIATTT
332	THPPTTTTTTTTTTTTTAAKATTT	24	0.13	1.25	-0.7	2409.58	C99H169N27O42S0	0	2.01 kcal/mol		AP02877	Bacteriosin	Hominicin	0.3462	Anti-Gram+ & Gram-, Anti-MRSA	8.44	0	1	16.41 stable	THPPTTTTTTTTTTTTTAAKATTT
333	THPPTTTTTTTTTTTTTAALATTT	24	0.17	0.25	-0.379167	2394.57	C99H168N26O42S0	0	1.58 kcal/mol		AP02877	Bacteriosin	Hominicin	0.3462	Anti-Gram+ & Gram-, Anti-MRSA	6.4	0	0	16.41 stable	THPPTTTTTTTTTTTTTAALATTT
334	THPPTTTTTTTTTTTTTAAMATTT	24	0.17	0.25	-0.458333	2412.61	C98H166N26O42S1	0	1.69 kcal/mol		AP02877	Bacteriosin	Hominicin	0.3462	Anti-Gram+ & Gram-, Anti-MRSA	6.4	0	0	21.55 stable	THPPTTTTTTTTTTTTTAAMATTT
335	THPPTTTTTTTTTTTTTAANATTT	24	0.13	0.25	-0.683333	2395.52	C97H164N26O43S0	0	2.06 kcal/mol		AP02877	Bacteriosin	Hominicin	0.3462	Anti-Gram+ & Gram-, Anti-MRSA	6.4	0	0	16.41 stable	THPPTTTTTTTTTTTTTAANATTT
336	THPPTTTTTTTTTTTTTAAQATTT	24	0.13	0.25	-0.683333	2409.54	C98H165N27O43S0	0	2.01 kcal/mol		AP02877	Bacteriosin	Hominicin	0.3462	Anti-Gram+ & Gram-, Anti-MRSA	6.4	0	0	16.41 stable	THPPTTTTTTTTTTTTTAAQATTT
337	THPPTTTTTTTTTTTTTAARATTT	24	0.13	1.25	-0.725	2437.6	C99H169N29O42S0	0	2.4 kcal/mol		AP02877	Bacteriosin	Hominicin	0.3462	Anti-Gram+ & Gram-, Anti-MRSA	9.44	0	1	16.41 stable	THPPTTTTTTTTTTTTTAARATTT
338	THPPTTTTTTTTTTTTTAASATTT	24	0.13	0.25	-0.570833	2368.49	C96H162N26O43S0	0	1.92 kcal/mol		AP02877	Bacteriosin	Hominicin	0.3462	Anti-Gram+ & Gram-, Anti-MRSA	6.4	0	0	16.41 stable	THPPTTTTTTTTTTTTTAASATTT
339	THPPTTTTTTTTTTTTTAATATTT	24	0.13	0.25	-0.566667	2382.52	C97H164N26O43S0	0	1.89 kcal/mol		AP02877	Bacteriosin	Hominicin	0.3462	Anti-Gram+ & Gram-, Anti-MRSA	6.4	0	0	16.41 stable	THPPTTTTTTTTTTTTTAATATTT
340	THPPTTTTTTTTTTTTTAAVATTT	24	0.17	0.25	-0.3625	2380.55	C98H166N26O42S0	0	1.62 kcal/mol		AP02877	Bacteriosin	Hominicin	0.3846	Anti-Gram+ & Gram-, Anti-MRSA	6.4	0	0	16.41 stable	THPPTTTTTTTTTTTTTAAVATTT
341	THPPTTTTTTTTTTTTTAAWATTT	24	0.17	0.25	-0.575	2467.62	C104H168N27O42S0	5550	1.69 kcal/mol		AP02877	Bacteriosin	Hominicin	0.3462	Anti-Gram+ & Gram-, Anti-MRSA	6.4	0	0	10.15 stable	THPPTTTTTTTTTTTTTAAWATTT
342	THPPTTTTTTTTTTTTTAAYATTT	24	0.13	0.25	-0.591667	2444.59	C102H166N26O43S0	1490	1.79 kcal/mol		AP02877	Bacteriosin	Hominicin	0.3462	Anti-Gram+ & Gram-, Anti-MRSA	6.4	0	0	26.28 stable	THPPTTTTTTTTTTTTTAAYATTT
343	THPPTTTTTTTTTTTTTAAPCTTT	24	0.13	0.25	-0.575	2410.59	C98H164N26O42S1	62.5	1.81 kcal/mol		AP02877	Bacteriosin	Hominicin	0.32	Anti-Gram+ & Gram-, Anti-MRSA	6.4	0	0	34.88 stable	THPPTTTTTTTTTTTTTAAPCTTT
344	THPPTTTTTTTTTTTTTAAPDTTT	24	0.08	-0.75	-0.825	2422.54	C99H164N26O44S0	0	2.22 kcal/mol		AP02877	Bacteriosin	Hominicin	0.32	Anti-Gram+ & Gram-, Anti-MRSA	5.05	1	0	15.03 stable	THPPTTTTTTTTTTTTTAAPDTTT
345	THPPTTTTTTTTTTTTTAAPETTT	24	0.08	-0.75	-0.825	2436.57	C100H166N26O44S0	0	2.14 kcal/mol		AP02877	Bacteriosin	Hominicin	0.32	Anti-Gram+ & Gram-, Anti-MRSA	5.21	1	0	31.67 stable	THPPTTTTTTTTTTTTTAAPETTT
346	THPPTTTTTTTTTTTTTAAPFTTT	24	0.13	0.25	-0.5625	2454.63	C104H168N26O42S0	0	1.73 kcal/mol		AP02877	Bacteriosin	Hominicin	0.32	Anti-Gram+ & Gram-, Anti-MRSA	6.4	0	0	32.46 stable	THPPTTTTTTTTTTTTTAAPFTTT
347	THPPTTTTTTTTTTTTTAAPGTTT	24	0.08	0.25	-0.695833	2364.5	C97H162N26O42S0	0	1.82 kcal/mol		AP02877	Bacteriosin	Hominicin	0.32	Anti-Gram+ & Gram-, Anti-MRSA	6.4	0	0	20.9 stable	THPPTTTTTTTTTTTTTAAPGTTT
348	THPPTTTTTTTTTTTTTAAPHTTT	24	0.08	0.5	-0.8125	2444.59	C101H166N28O42S0	0	2.05 kcal/mol		AP02877	Bacteriosin	Hominicin	0.32	Anti-Gram+ & Gram-, Anti-MRSA	6.61	0	0	21.29 stable	THPPTTTTTTTTTTTTTAAPHTTT
349	THPPTTTTTTTTTTTTTAAPITTT	24	0.13	0.25	-0.491667	2420.61	C101H170N26O42S0	0	1.65 kcal/mol		AP02877	Bacteriosin	Hominicin	0.36	Anti-Gram+ & Gram-, Anti-MRSA	6.4	0	0	24.43 stable	THPPTTTTTTTTTTTTTAAPITTT
350	THPPTTTTTTTTTTTTTAAPKTTT	24	0.08	1.25	-0.841667	2435.62	C101H171N27O42S0	0	2.09 kcal/mol		AP02877	Bacteriosin	Hominicin	0.32	Anti-Gram+ & Gram-, Anti-MRSA	8.44	0	1	24.43 stable	THPPTTTTTTTTTTTTTAAPKTTT
351	THPPTTTTTTTTTTTTTAAPLTTT	24	0.13	0.25	-0.520833	2420.61	C101H170N26O42S0	0	1.65 kcal/mol		AP02877	Bacteriosin	Hominicin	0.32	Anti-Gram+ & Gram-, Anti-MRSA	6.4	0	0	24.43 stable	THPPTTTTTTTTTTTTTAAPLTTT
352	THPPTTTTTTTTTTTTTAAPMTTT	24	0.13	0.25	-0.6	2438.65	C100H168N26O42S1	0	1.76 kcal/mol		AP02877	Bacteriosin	Hominicin	0.32	Anti-Gram+ & Gram-, Anti-MRSA	6.4	0	0	20.09 stable	THPPTTTTTTTTTTTTTAAPMTTT
353	THPPTTTTTTTTTTTTTAAPNTTT	24	0.08	0.25	-0.825	2421.55	C99H166N26O43S0	0	2.14 kcal/mol		AP02877	Bacteriosin	Hominicin	0.32	Anti-Gram+ & Gram-, Anti-MRSA	6.4	0	0	20.9 stable	THPPTTTTTTTTTTTTTAAPNTTT
354	THPPTTTTTTTTTTTTTAAPPTTT	24	0.08	0.25	-0.745833	2404.57	C100H166N26O42S0	0	1.86 kcal/mol		AP02877	Bacteriosin	Hominicin	0.32	Anti-Gram+ & Gram-, Anti-MRSA	6.4	0	0	32.46 stable	THPPTTTTTTTTTTTTTAAPPTTT
355	THPPTTTTTTTTTTTTTAAPQTTT	24	0.08	0.25	-0.825	2435.58	C100H167N27O43S0	0	2.09 kcal/mol		AP02877	Bacteriosin	Hominicin	0.32	Anti-Gram+ & Gram-, Anti-MRSA	6.4	0	0	32.46 stable	THPPTTTTTTTTTTTTTAAPQTTT
356	THPPTTTTTTTTTTTTTAAPRTTT	24	0.08	1.25	-0.866667	2463.64	C101H171N29O42S0	0	2.48 kcal/mol		AP02877	Bacteriosin	Hominicin	0.32	Anti-Gram+ & Gram-, Anti-MRSA	9.44	0	1	21.29 stable	THPPTTTTTTTTTTTTTAAPRTTT
357	THPPTTTTTTTTTTTTTAAPSTTT	24	0.08	0.25	-0.7125	2394.53	C98H164N26O43S0	0	2 kcal/mol		AP02877	Bacteriosin	Hominicin	0.32	Anti-Gram+ & Gram-, Anti-MRSA	6.4	0	0	32.46 stable	THPPTTTTTTTTTTTTTAAPSTTT
358	THPPTTTTTTTTTTTTTAAPTTTT	24	0.08	0.25	-0.708333	2408.55	C99H166N26O43S0	0	1.97 kcal/mol		AP02877	Bacteriosin	Hominicin	0.32	Anti-Gram+ & Gram-, Anti-MRSA	6.4	0	0	24.43 stable	THPPTTTTTTTTTTTTTAAPTTTT
359	THPPTTTTTTTTTTTTTAAPVTTT	24	0.13	0.25	-0.504167	2406.58	C100H168N26O42S0	0	1.69 kcal/mol		AP02877	Bacteriosin	Hominicin	0.36	Anti-Gram+ & Gram-, Anti-MRSA	6.4	0	0	28.92 stable	THPPTTTTTTTTTTTTTAAPVTTT
360	THPPTTTTTTTTTTTTTAAPWTTT	24	0.13	0.25	-0.716667	2493.66	C106H170N27O42S0	5550	1.76 kcal/mol		AP02877	Bacteriosin	Hominicin	0.32	Anti-Gram+ & Gram-, Anti-MRSA	6.4	0	0	16.97 stable	THPPTTTTTTTTTTTTTAAPWTTT
361	THPPTTTTTTTTTTTTTAAPYTTT	24	0.08	0.25	-0.733333	2470.63	C104H168N26O43S0	1490	1.86 kcal/mol		AP02877	Bacteriosin	Hominicin	0.32	Anti-Gram+ & Gram-, Anti-MRSA	6.4	0	0	20.9 stable	THPPTTTTTTTTTTTTTAAPYTTT
362	THPPTTTTTTTTTTTTTAAPAATT	24	0.17	0.25	-0.5	2348.5	C97H162N26O41S0	0	1.6 kcal/mol		AP02877	Bacteriosin	Hominicin	0.36	Anti-Gram+ & Gram-, Anti-MRSA	6.4	0	0	32.46 stable	THPPTTTTTTTTTTTTTAAPAATT
363	THPPTTTTTTTTTTTTTAAPACTT	24	0.17	0.25	-0.470833	2380.57	C97H162N26O41S1	62.5	1.62 kcal/mol		AP02877	Bacteriosin	Hominicin	0.3462	Anti-Gram+ & Gram-, Anti-MRSA	6.4	0	0	64.35 stable	THPPTTTTTTTTTTTTTAAPACTT
364	THPPTTTTTTTTTTTTTAAPADTT	24	0.13	-0.75	-0.720833	2392.51	C98H162N26O43S0	0	2.04 kcal/mol		AP02877	Bacteriosin	Hominicin	0.3462	Anti-Gram+ & Gram-, Anti-MRSA	5.05	1	0	22.66 stable	THPPTTTTTTTTTTTTTAAPADTT
365	THPPTTTTTTTTTTTTTAAPAETT	24	0.13	-0.75	-0.720833	2406.54	C99H164N26O43S0	0	1.96 kcal/mol		AP02877	Bacteriosin	Hominicin	0.3462	Anti-Gram+ & Gram-, Anti-MRSA	5.21	1	0	32.46 stable	THPPTTTTTTTTTTTTTAAPAETT
366	THPPTTTTTTTTTTTTTAAPAFTT	24	0.17	0.25	-0.458333	2424.6	C103H166N26O41S0	0	1.55 kcal/mol		AP02877	Bacteriosin	Hominicin	0.3462	Anti-Gram+ & Gram-, Anti-MRSA	6.4	0	0	32.46 stable	THPPTTTTTTTTTTTTTAAPAFTT
367	THPPTTTTTTTTTTTTTAAPAGTT	24	0.13	0.25	-0.591667	2334.48	C96H160N26O41S0	0	1.64 kcal/mol		AP02877	Bacteriosin	Hominicin	0.3462	Anti-Gram+ & Gram-, Anti-MRSA	6.4	0	0	28.92 stable	THPPTTTTTTTTTTTTTAAPAGTT
368	THPPTTTTTTTTTTTTTAAPAHTT	24	0.13	0.5	-0.708333	2414.57	C100H164N28O41S0	0	1.87 kcal/mol		AP02877	Bacteriosin	Hominicin	0.3462	Anti-Gram+ & Gram-, Anti-MRSA	6.61	0	0	25.78 stable	THPPTTTTTTTTTTTTTAAPAHTT
369	THPPTTTTTTTTTTTTTAAPAITT	24	0.17	0.25	-0.3875	2390.58	C100H168N26O41S0	0	1.47 kcal/mol		AP02877	Bacteriosin	Hominicin	0.36	Anti-Gram+ & Gram-, Anti-MRSA	6.4	0	0	32.46 stable	THPPTTTTTTTTTTTTTAAPAITT
370	THPPTTTTTTTTTTTTTAAPAKTT	24	0.13	1.25	-0.7375	2405.59	C100H169N27O41S0	0	1.91 kcal/mol		AP02877	Bacteriosin	Hominicin	0.3462	Anti-Gram+ & Gram-, Anti-MRSA	8.44	0	1	32.46 stable	THPPTTTTTTTTTTTTTAAPAKTT
371	THPPTTTTTTTTTTTTTAAPALTT	24	0.17	0.25	-0.416667	2390.58	C100H168N26O41S0	0	1.47 kcal/mol		AP02877	Bacteriosin	Hominicin	0.3462	Anti-Gram+ & Gram-, Anti-MRSA	6.4	0	0	32.46 stable	THPPTTTTTTTTTTTTTAAPALTT
372	THPPTTTTTTTTTTTTTAAPAMTT	24	0.17	0.25	-0.495833	2408.62	C99H166N26O41S1	0	1.58 kcal/mol		AP02877	Bacteriosin	Hominicin	0.3462	Anti-Gram+ & Gram-, Anti-MRSA	6.4	0	0	31.26 stable	THPPTTTTTTTTTTTTTAAPAMTT
373	THPPTTTTTTTTTTTTTAAPANTT	24	0.13	0.25	-0.720833	2391.53	C98H164N26O42S0	0	1.95 kcal/mol		AP02877	Bacteriosin	Hominicin	0.3462	Anti-Gram+ & Gram-, Anti-MRSA	6.4	0	0	28.92 stable	THPPTTTTTTTTTTTTTAAPANTT
374	THPPTTTTTTTTTTTTTAAPAPTT	24	0.13	0.25	-0.641667	2374.54	C99H164N26O41S0	0	1.68 kcal/mol		AP02877	Bacteriosin	Hominicin	0.3462	Anti-Gram+ & Gram-, Anti-MRSA	6.4	0	0	40.48 unstable	THPPTTTTTTTTTTTTTAAPAPTT
375	THPPTTTTTTTTTTTTTAAPAQTT	24	0.13	0.25	-0.720833	2405.55	C99H165N27O42S0	0	1.91 kcal/mol		AP02877	Bacteriosin	Hominicin	0.3462	Anti-Gram+ & Gram-, Anti-MRSA	6.4	0	0	32.46 stable	THPPTTTTTTTTTTTTTAAPAQTT
376	THPPTTTTTTTTTTTTTAAPARTT	24	0.13	1.25	-0.7625	2433.61	C100H169N29O41S0	0	2.3 kcal/mol		AP02877	Bacteriosin	Hominicin	0.3462	Anti-Gram+ & Gram-, Anti-MRSA	9.44	0	1	32.46 stable	THPPTTTTTTTTTTTTTAAPARTT
377	THPPTTTTTTTTTTTTTAAPASTT	24	0.13	0.25	-0.608333	2364.5	C97H162N26O42S0	0	1.82 kcal/mol		AP02877	Bacteriosin	Hominicin	0.3462	Anti-Gram+ & Gram-, Anti-MRSA	6.4	0	0	32.46 stable	THPPTTTTTTTTTTTTTAAPASTT
378	THPPTTTTTTTTTTTTTAAPAVTT	24	0.17	0.25	-0.4	2376.56	C99H166N26O41S0	0	1.51 kcal/mol		AP02877	Bacteriosin	Hominicin	0.36	Anti-Gram+ & Gram-, Anti-MRSA	6.4	0	0	28.92 stable	THPPTTTTTTTTTTTTTAAPAVTT
379	THPPTTTTTTTTTTTTTAAPAWTT	24	0.17	0.25	-0.6125	2463.64	C105H168N27O41S0	5550	1.58 kcal/mol		AP02877	Bacteriosin	Hominicin	0.3462	Anti-Gram+ & Gram-, Anti-MRSA	6.4	0	0	26.2 stable	THPPTTTTTTTTTTTTTAAPAWTT
380	THPPTTTTTTTTTTTTTAAPAYTT	24	0.13	0.25	-0.629167	2440.6	C103H166N26O42S0	1490	1.68 kcal/mol		AP02877	Bacteriosin	Hominicin	0.3462	Anti-Gram+ & Gram-, Anti-MRSA	6.4	0	0	28.92 stable	THPPTTTTTTTTTTTTTAAPAYTT
381	THPPTTTTTTTTTTTTTAAPATAT	24	0.17	0.25	-0.5	2348.5	C97H162N26O41S0	0	1.6 kcal/mol		AP02877	Bacteriosin	Hominicin	0.36	Anti-Gram+ & Gram-, Anti-MRSA	6.4	0	0	32.46 stable	THPPTTTTTTTTTTTTTAAPATAT
382	THPPTTTTTTTTTTTTTAAPATCT	24	0.17	0.25	-0.470833	2380.57	C97H162N26O41S1	62.5	1.62 kcal/mol		AP02877	Bacteriosin	Hominicin	0.3462	Anti-Gram+ & Gram-, Anti-MRSA	6.4	0	0	46.04 unstable	THPPTTTTTTTTTTTTTAAPATCT
383	THPPTTTTTTTTTTTTTAAPATDT	24	0.13	-0.75	-0.720833	2392.51	C98H162N26O43S0	0	2.04 kcal/mol		AP02877	Bacteriosin	Hominicin	0.3462	Anti-Gram+ & Gram-, Anti-MRSA	5.05	1	0	26.2 stable	THPPTTTTTTTTTTTTTAAPATDT
384	THPPTTTTTTTTTTTTTAAPATET	24	0.13	-0.75	-0.720833	2406.54	C99H164N26O43S0	0	1.96 kcal/mol		AP02877	Bacteriosin	Hominicin	0.3462	Anti-Gram+ & Gram-, Anti-MRSA	5.21	1	0	40.48 unstable	THPPTTTTTTTTTTTTTAAPATET
385	THPPTTTTTTTTTTTTTAAPATFT	24	0.17	0.25	-0.458333	2424.6	C103H166N26O41S0	0	1.55 kcal/mol		AP02877	Bacteriosin	Hominicin	0.3462	Anti-Gram+ & Gram-, Anti-MRSA	6.4	0	0	37.6 stable	THPPTTTTTTTTTTTTTAAPATFT
386	THPPTTTTTTTTTTTTTAAPATGT	24	0.13	0.25	-0.591667	2334.48	C96H160N26O41S0	0	1.64 kcal/mol		AP02877	Bacteriosin	Hominicin	0.3462	Anti-Gram+ & Gram-, Anti-MRSA	6.4	0	0	25.38 stable	THPPTTTTTTTTTTTTTAAPATGT
387	THPPTTTTTTTTTTTTTAAPATHT	24	0.13	0.5	-0.708333	2414.57	C100H164N28O41S0	0	1.87 kcal/mol		AP02877	Bacteriosin	Hominicin	0.3462	Anti-Gram+ & Gram-, Anti-MRSA	6.61	0	0	29.32 stable	THPPTTTTTTTTTTTTTAAPATHT
388	THPPTTTTTTTTTTTTTAAPATIT	24	0.17	0.25	-0.3875	2390.58	C100H168N26O41S0	0	1.47 kcal/mol		AP02877	Bacteriosin	Hominicin	0.36	Anti-Gram+ & Gram-, Anti-MRSA	6.4	0	0	32.46 stable	THPPTTTTTTTTTTTTTAAPATIT
389	THPPTTTTTTTTTTTTTAAPATKT	24	0.13	1.25	-0.7375	2405.59	C100H169N27O41S0	0	1.91 kcal/mol		AP02877	Bacteriosin	Hominicin	0.3462	Anti-Gram+ & Gram-, Anti-MRSA	8.44	0	1	32.46 stable	THPPTTTTTTTTTTTTTAAPATKT
390	THPPTTTTTTTTTTTTTAAPATLT	24	0.17	0.25	-0.416667	2390.58	C100H168N26O41S0	0	1.47 kcal/mol		AP02877	Bacteriosin	Hominicin	0.3462	Anti-Gram+ & Gram-, Anti-MRSA	6.4	0	0	32.46 stable	THPPTTTTTTTTTTTTTAAPATLT
391	THPPTTTTTTTTTTTTTAAPATMT	24	0.17	0.25	-0.495833	2408.62	C99H166N26O41S1	0	1.58 kcal/mol		AP02877	Bacteriosin	Hominicin	0.3462	Anti-Gram+ & Gram-, Anti-MRSA	6.4	0	0	31.26 stable	THPPTTTTTTTTTTTTTAAPATMT
392	THPPTTTTTTTTTTTTTAAPATNT	24	0.13	0.25	-0.720833	2391.53	C98H164N26O42S0	0	1.95 kcal/mol		AP02877	Bacteriosin	Hominicin	0.3462	Anti-Gram+ & Gram-, Anti-MRSA	6.4	0	0	22.66 stable	THPPTTTTTTTTTTTTTAAPATNT
393	THPPTTTTTTTTTTTTTAAPATPT	24	0.13	0.25	-0.641667	2374.54	C99H164N26O41S0	0	1.68 kcal/mol		AP02877	Bacteriosin	Hominicin	0.3462	Anti-Gram+ & Gram-, Anti-MRSA	6.4	0	0	32.46 stable	THPPTTTTTTTTTTTTTAAPATPT
394	THPPTTTTTTTTTTTTTAAPATQT	24	0.13	0.25	-0.720833	2405.55	C99H165N27O42S0	0	1.91 kcal/mol		AP02877	Bacteriosin	Hominicin	0.3462	Anti-Gram+ & Gram-, Anti-MRSA	6.4	0	0	29.32 stable	THPPTTTTTTTTTTTTTAAPATQT
395	THPPTTTTTTTTTTTTTAAPATRT	24	0.13	1.25	-0.7625	2433.61	C100H169N29O41S0	0	2.3 kcal/mol		AP02877	Bacteriosin	Hominicin	0.3462	Anti-Gram+ & Gram-, Anti-MRSA	9.44	0	1	32.46 stable	THPPTTTTTTTTTTTTTAAPATRT
396	THPPTTTTTTTTTTTTTAAPATST	24	0.13	0.25	-0.608333	2364.5	C97H162N26O42S0	0	1.82 kcal/mol		AP02877	Bacteriosin	Hominicin	0.3462	Anti-Gram+ & Gram-, Anti-MRSA	6.4	0	0	32.46 stable	THPPTTTTTTTTTTTTTAAPATST
397	THPPTTTTTTTTTTTTTAAPATVT	24	0.17	0.25	-0.4	2376.56	C99H166N26O41S0	0	1.51 kcal/mol		AP02877	Bacteriosin	Hominicin	0.3462	Anti-Gram+ & Gram-, Anti-MRSA	6.4	0	0	28.92 stable	THPPTTTTTTTTTTTTTAAPATVT
398	THPPTTTTTTTTTTTTTAAPATWT	24	0.17	0.25	-0.6125	2463.64	C105H168N27O41S0	5550	1.58 kcal/mol		AP02877	Bacteriosin	Hominicin	0.3462	Anti-Gram+ & Gram-, Anti-MRSA	6.4	0	0	19.93 stable	THPPTTTTTTTTTTTTTAAPATWT
399	THPPTTTTTTTTTTTTTAAPATYT	24	0.13	0.25	-0.629167	2440.6	C103H166N26O42S0	1490	1.68 kcal/mol		AP02877	Bacteriosin	Hominicin	0.3462	Anti-Gram+ & Gram-, Anti-MRSA	6.4	0	0	28.92 stable	THPPTTTTTTTTTTTTTAAPATYT
400	THPPTTTTTTTTTTTTTAAPATTA	24	0.17	0.25	-0.5	2348.5	C97H162N26O41S0	0	1.6 kcal/mol		AP02877	Bacteriosin	Hominicin	0.36	Anti-Gram+ & Gram-, Anti-MRSA	6.4	0	0	32.46 stable	THPPTTTTTTTTTTTTTAAPATTA
401	THPPTTTTTTTTTTTTTAAPATTC	24	0.17	0.25	-0.470833	2380.57	C97H162N26O41S1	62.5	1.62 kcal/mol		AP02877	Bacteriosin	Hominicin	0.3462	Anti-Gram+ & Gram-, Anti-MRSA	6.4	0	0	32.46 stable	THPPTTTTTTTTTTTTTAAPATTC
402	THPPTTTTTTTTTTTTTAAPATTD	24	0.13	-0.75	-0.720833	2392.51	C98H162N26O43S0	0	2.04 kcal/mol		AP02877	Bacteriosin	Hominicin	0.3462	Anti-Gram+ & Gram-, Anti-MRSA	5.05	1	0	32.46 stable	THPPTTTTTTTTTTTTTAAPATTD
403	THPPTTTTTTTTTTTTTAAPATTE	24	0.13	-0.75	-0.720833	2406.54	C99H164N26O43S0	0	1.96 kcal/mol		AP02877	Bacteriosin	Hominicin	0.3462	Anti-Gram+ & Gram-, Anti-MRSA	5.21	1	0	40.48 unstable	THPPTTTTTTTTTTTTTAAPATTE
404	THPPTTTTTTTTTTTTTAAPATTF	24	0.17	0.25	-0.458333	2424.6	C103H166N26O41S0	0	1.55 kcal/mol		AP02877	Bacteriosin	Hominicin	0.3462	Anti-Gram+ & Gram-, Anti-MRSA	6.4	0	0	37.6 stable	THPPTTTTTTTTTTTTTAAPATTF
405	THPPTTTTTTTTTTTTTAAPATTG	24	0.13	0.25	-0.591667	2334.48	C96H160N26O41S0	0	1.64 kcal/mol		AP02877	Bacteriosin	Hominicin	0.3462	Anti-Gram+ & Gram-, Anti-MRSA	6.4	0	0	28.92 stable	THPPTTTTTTTTTTTTTAAPATTG
406	THPPTTTTTTTTTTTTTAAPATTH	24	0.13	0.5	-0.708333	2414.57	C100H164N28O41S0	0	1.87 kcal/mol		AP02877	Bacteriosin	Hominicin	0.3462	Anti-Gram+ & Gram-, Anti-MRSA	6.61	0	0	32.46 stable	THPPTTTTTTTTTTTTTAAPATTH
407	THPPTTTTTTTTTTTTTAAPATTI	24	0.17	0.25	-0.3875	2390.58	C100H168N26O41S0	0	1.47 kcal/mol		AP02877	Bacteriosin	Hominicin	0.3462	Anti-Gram+ & Gram-, Anti-MRSA	6.4	0	0	32.46 stable	THPPTTTTTTTTTTTTTAAPATTI
408	THPPTTTTTTTTTTTTTAAPATTK	24	0.13	1.25	-0.7375	2405.59	C100H169N27O41S0	0	1.91 kcal/mol		AP02052	Bacteriosin	Hominicin	0.3571	Anti-Gram+ & Gram-, Anti-MRSA	8.44	0	1	32.46 stable	THPPTTTTTTTTTTTTTAAPATTK
409	THPPTTTTTTTTTTTTTAAPATTL	24	0.17	0.25	-0.416667	2390.58	C100H168N26O41S0	0	1.47 kcal/mol		AP02877	Bacteriosin	Hominicin	0.3462	Anti-Gram+ & Gram-, Anti-MRSA	6.4	0	0	32.46 stable	THPPTTTTTTTTTTTTTAAPATTL
410	THPPTTTTTTTTTTTTTAAPATTM	24	0.17	0.25	-0.495833	2408.62	C99H166N26O41S1	0	1.58 kcal/mol		AP02877	Bacteriosin	Hominicin	0.3462	Anti-Gram+ & Gram-, Anti-MRSA	6.4	0	0	32.46 stable	THPPTTTTTTTTTTTTTAAPATTM
411	THPPTTTTTTTTTTTTTAAPATTN	24	0.13	0.25	-0.720833	2391.53	C98H164N26O42S0	0	1.95 kcal/mol		AP02877	Bacteriosin	Hominicin	0.3462	Anti-Gram+ & Gram-, Anti-MRSA	6.4	0	0	26.2 stable	THPPTTTTTTTTTTTTTAAPATTN
412	THPPTTTTTTTTTTTTTAAPATTP	24	0.13	0.25	-0.641667	2374.54	C99H164N26O41S0	0	1.68 kcal/mol		AP02877	Bacteriosin	Hominicin	0.3462	Anti-Gram+ & Gram-, Anti-MRSA	6.4	0	0	32.46 stable	THPPTTTTTTTTTTTTTAAPATTP
413	THPPTTTTTTTTTTTTTAAPATTQ	24	0.13	0.25	-0.720833	2405.55	C99H165N27O42S0	0	1.91 kcal/mol		AP02877	Bacteriosin	Hominicin	0.3462	Anti-Gram+ & Gram-, Anti-MRSA	6.4	0	0	29.32 stable	THPPTTTTTTTTTTTTTAAPATTQ
414	THPPTTTTTTTTTTTTTAAPATTR	24	0.13	1.25	-0.7625	2433.61	C100H169N29O41S0	0	2.3 kcal/mol		AP02877	Bacteriosin	Hominicin	0.3462	Anti-Gram+ & Gram-, Anti-MRSA	9.44	0	1	32.46 stable	THPPTTTTTTTTTTTTTAAPATTR
415	THPPTTTTTTTTTTTTTAAPATTS	24	0.13	0.25	-0.608333	2364.5	C97H162N26O42S0	0	1.82 kcal/mol		AP02052	Bacteriosin	Hominicin	0.3571	Anti-Gram+ & Gram-, Anti-MRSA	6.4	0	0	32.46 stable	THPPTTTTTTTTTTTTTAAPATTS
416	THPPTTTTTTTTTTTTTAAPATTV	24	0.17	0.25	-0.4	2376.56	C99H166N26O41S0	0	1.51 kcal/mol		AP02052	Bacteriosin	Hominicin	0.3571	Anti-Gram+ & Gram-, Anti-MRSA	6.4	0	0	32.46 stable	THPPTTTTTTTTTTTTTAAPATTV
417	THPPTTTTTTTTTTTTTAAPATTW	24	0.17	0.25	-0.6125	2463.64	C105H168N27O41S0	5550	1.58 kcal/mol		AP02877	Bacteriosin	Hominicin	0.3462	Anti-Gram+ & Gram-, Anti-MRSA	6.4	0	0	26.2 stable	THPPTTTTTTTTTTTTTAAPATTW
418	THPPTTTTTTTTTTTTTAAPATTY	24	0.13	0.25	-0.629167	2440.6	C103H166N26O42S0	1490	1.68 kcal/mol		AP02877	Bacteriosin	Hominicin	0.3462	Anti-Gram+ & Gram-, Anti-MRSA	6.4	0	0	32.46 stable	THPPTTTTTTTTTTTTTAAPATTY

## Sheet: AMPFun
		AMPFun
S.no	AMPs Sequence	AMP	Anti-cancer	Gram +	Gram -
1	AHPPTTTTTTTTTTTTTAAPATTT	Yes 0.9136	Yes 0.2691	Yes 0.5333	Yes 0.6494
2	CHPPTTTTTTTTTTTTTAAPATTT	Yes 0.9412	Yes 0.3274	Yes 0.5667	Yes 0.6728
3	DHPPTTTTTTTTTTTTTAAPATTT	Yes 0.9252	Yes 0.2496	No 0.5167	Yes 0.6043
4	EHPPTTTTTTTTTTTTTAAPATTT	Yes 0.8632	Yes 0.2298	No 0.5	Yes 0.605
5	FHPPTTTTTTTTTTTTTAAPATTT	Yes 0.9612	Yes 0.3191	Yes 0.575	Yes 0.7037
6	GHPPTTTTTTTTTTTTTAAPATTT	Yes 0.9204	Yes 0.2566	Yes 0.55	Yes 0.6782
7	HHPPTTTTTTTTTTTTTAAPATTT	Yes 0.9056	Yes 0.3024	Yes 0.575	Yes 0.5525
8	IHPPTTTTTTTTTTTTTAAPATTT	Yes 0.9512	Yes 0.3241	Yes 0.5417	Yes 0.6488
9	KHPPTTTTTTTTTTTTTAAPATTT	Yes 0.9242	No 0.1715	No 0.5167	Yes 0.6119
10	LHPPTTTTTTTTTTTTTAAPATTT	Yes 0.9612	Yes 0.3116	Yes 0.5333	Yes 0.6372
11	MHPPTTTTTTTTTTTTTAAPATTT	Yes 0.9679	Yes 0.3107	Yes 0.5417	Yes 0.51
12	NHPPTTTTTTTTTTTTTAAPATTT	Yes 0.8941	No 0.1704	No 0.475	Yes 0.5511
13	PHPPTTTTTTTTTTTTTAAPATTT	Yes 0.9126	Yes 0.2691	No 0.5167	Yes 0.5489
14	QHPPTTTTTTTTTTTTTAAPATTT	Yes 0.8672	No 0.1646	No 0.4667	Yes 0.6136
15	RHPPTTTTTTTTTTTTTAAPATTT	Yes 0.9242	No 0.1715	Yes 0.5333	Yes 0.6376
16	SHPPTTTTTTTTTTTTTAAPATTT	Yes 0.9263	Yes 0.2566	Yes 0.55	Yes 0.5826
17	VHPPTTTTTTTTTTTTTAAPATTT	Yes 0.9362	Yes 0.3241	Yes 0.5667	Yes 0.67
18	WHPPTTTTTTTTTTTTTAAPATTT	Yes 0.9612	Yes 0.3191	Yes 0.575	Yes 0.7037
19	YHPPTTTTTTTTTTTTTAAPATTT	Yes 0.9168	Yes 0.3024	Yes 0.5333	Yes 0.5971
20	TAPPTTTTTTTTTTTTTAAPATTT	Yes 0.8229	Yes 0.2941	Yes 0.6417	Yes 0.6494
21	TCPPTTTTTTTTTTTTTAAPATTT	Yes 0.8967	Yes 0.3181	Yes 0.625	Yes 0.6626
22	TDPPTTTTTTTTTTTTTAAPATTT	Yes 0.7964	Yes 0.237	Yes 0.625	Yes 0.56
23	TEPPTTTTTTTTTTTTTAAPATTT	Yes 0.7777	Yes 0.2179	Yes 0.5667	Yes 0.5436
24	TFPPTTTTTTTTTTTTTAAPATTT	Yes 0.9692	Yes 0.2899	Yes 0.5583	Yes 0.6226
25	TGPPTTTTTTTTTTTTTAAPATTT	Yes 0.8258	Yes 0.2941	Yes 0.6833	Yes 0.6668
26	TIPPTTTTTTTTTTTTTAAPATTT	Yes 0.8959	Yes 0.3326	Yes 0.6167	Yes 0.6613
27	TKPPTTTTTTTTTTTTTAAPATTT	Yes 0.9168	No 0.1677	No 0.4417	Yes 0.5677
28	TLPPTTTTTTTTTTTTTAAPATTT	Yes 0.9054	Yes 0.3076	Yes 0.6167	Yes 0.6504
29	TMPPTTTTTTTTTTTTTAAPATTT	Yes 0.9277	Yes 0.2816	Yes 0.55	Yes 0.5491
30	TNPPTTTTTTTTTTTTTAAPATTT	Yes 0.811	Yes 0.249	Yes 0.55	Yes 0.6053
31	TPPPTTTTTTTTTTTTTAAPATTT	Yes 0.8446	Yes 0.2816	Yes 0.6583	Yes 0.6261
32	TQPPTTTTTTTTTTTTTAAPATTT	Yes 0.8182	Yes 0.2179	No 0.5	Yes 0.606
33	TRPPTTTTTTTTTTTTTAAPATTT	Yes 0.9168	No 0.1677	No 0.475	Yes 0.6038
34	TSPPTTTTTTTTTTTTTAAPATTT	Yes 0.8216	Yes 0.2941	Yes 0.6833	Yes 0.6145
35	TTPPTTTTTTTTTTTTTAAPATTT	Yes 0.8186	Yes 0.3191	Yes 0.675	Yes 0.6256
36	TVPPTTTTTTTTTTTTTAAPATTT	Yes 0.9044	Yes 0.3326	Yes 0.6333	Yes 0.6424
37	TWPPTTTTTTTTTTTTTAAPATTT	Yes 0.9581	Yes 0.2899	Yes 0.5583	Yes 0.6373
38	TYPPTTTTTTTTTTTTTAAPATTT	Yes 0.9302	Yes 0.2941	Yes 0.5333	Yes 0.5902
39	THAPTTTTTTTTTTTTTAAPATTT	Yes 0.9076	Yes 0.2691	Yes 0.5333	Yes 0.6334
40	THCPTTTTTTTTTTTTTAAPATTT	Yes 0.9489	Yes 0.2816	Yes 0.5333	Yes 0.6551
41	THDPTTTTTTTTTTTTTAAPATTT	Yes 0.9074	No 0.1662	Yes 0.525	Yes 0.5276
42	THEPTTTTTTTTTTTTTAAPATTT	Yes 0.8824	No 0.1682	No 0.475	No 0.4248
43	THFPTTTTTTTTTTTTTAAPATTT	Yes 0.9646	Yes 0.2877	Yes 0.525	Yes 0.6551
44	THGPTTTTTTTTTTTTTAAPATTT	Yes 0.9109	Yes 0.2816	Yes 0.575	Yes 0.6666
45	THHPTTTTTTTTTTTTTAAPATTT	Yes 0.9009	Yes 0.2835	Yes 0.5417	Yes 0.5662
46	THIPTTTTTTTTTTTTTAAPATTT	Yes 0.9608	Yes 0.3003	Yes 0.525	Yes 0.638
47	THKPTTTTTTTTTTTTTAAPATTT	Yes 0.942	No 0.1556	No 0.4583	Yes 0.5195
48	THLPTTTTTTTTTTTTTAAPATTT	Yes 0.9683	Yes 0.2878	Yes 0.5583	Yes 0.6587
49	THMPTTTTTTTTTTTTTAAPATTT	Yes 0.9261	Yes 0.2752	Yes 0.5333	Yes 0.5479
50	THNPTTTTTTTTTTTTTAAPATTT	Yes 0.8993	No 0.1907	No 0.4417	Yes 0.5269
51	THQPTTTTTTTTTTTTTAAPATTT	Yes 0.9084	No 0.1682	No 0.4583	Yes 0.5678
52	THRPTTTTTTTTTTTTTAAPATTT	Yes 0.9401	No 0.139	No 0.4833	Yes 0.5389
53	THSPTTTTTTTTTTTTTAAPATTT	Yes 0.9096	Yes 0.2816	Yes 0.5583	Yes 0.601
54	THTPTTTTTTTTTTTTTAAPATTT	Yes 0.9066	Yes 0.2816	Yes 0.55	Yes 0.5982
55	THVPTTTTTTTTTTTTTAAPATTT	Yes 0.9683	Yes 0.3003	Yes 0.5417	Yes 0.6468
56	THWPTTTTTTTTTTTTTAAPATTT	Yes 0.9646	Yes 0.2877	Yes 0.525	Yes 0.6551
57	THYPTTTTTTTTTTTTTAAPATTT	Yes 0.9268	Yes 0.2835	No 0.4917	Yes 0.5671
58	THPATTTTTTTTTTTTTAAPATTT	Yes 0.9109	Yes 0.2691	Yes 0.55	Yes 0.624
59	THPCTTTTTTTTTTTTTAAPATTT	Yes 0.95	Yes 0.2899	Yes 0.5333	Yes 0.6354
60	THPDTTTTTTTTTTTTTAAPATTT	Yes 0.9074	No 0.1787	No 0.4917	Yes 0.5264
61	THPETTTTTTTTTTTTTAAPATTT	Yes 0.8747	No 0.1807	No 0.4583	No 0.4535
62	THPFTTTTTTTTTTTTTAAPATTT	Yes 0.9646	Yes 0.2877	Yes 0.525	Yes 0.652
63	THPGTTTTTTTTTTTTTAAPATTT	Yes 0.9209	Yes 0.2816	Yes 0.5583	Yes 0.6628
64	THPHTTTTTTTTTTTTTAAPATTT	Yes 0.9109	Yes 0.2835	Yes 0.5583	Yes 0.569
65	THPITTTTTTTTTTTTTAAPATTT	Yes 0.9671	Yes 0.3003	Yes 0.5583	Yes 0.6239
66	THPKTTTTTTTTTTTTTAAPATTT	Yes 0.9234	No 0.1681	No 0.45	Yes 0.5528
67	THPLTTTTTTTTTTTTTAAPATTT	Yes 0.9548	Yes 0.2878	Yes 0.5417	Yes 0.6315
68	THPMTTTTTTTTTTTTTAAPATTT	Yes 0.9183	Yes 0.2752	Yes 0.5333	Yes 0.5495
69	THPNTTTTTTTTTTTTTAAPATTT	Yes 0.8922	Yes 0.2032	No 0.4417	Yes 0.5478
70	THPQTTTTTTTTTTTTTAAPATTT	Yes 0.9007	No 0.1807	No 0.45	Yes 0.5734
71	THPRTTTTTTTTTTTTTAAPATTT	Yes 0.9401	No 0.1515	No 0.475	Yes 0.5472
72	THPSTTTTTTTTTTTTTAAPATTT	Yes 0.9096	Yes 0.2816	Yes 0.5667	Yes 0.6038
73	THPTTTTTTTTTTTTTTAAPATTT	Yes 0.9109	Yes 0.2816	Yes 0.5667	Yes 0.601
74	THPVTTTTTTTTTTTTTAAPATTT	Yes 0.9783	Yes 0.3003	Yes 0.5417	Yes 0.627
75	THPWTTTTTTTTTTTTTAAPATTT	Yes 0.9646	Yes 0.2877	Yes 0.525	Yes 0.6354
76	THPYTTTTTTTTTTTTTAAPATTT	Yes 0.9268	Yes 0.2835	No 0.5083	Yes 0.5594
77	THPPATTTTTTTTTTTTAAPATTT	Yes 0.9109	Yes 0.2691	Yes 0.5667	Yes 0.6365
78	THPPCTTTTTTTTTTTTAAPATTT	Yes 0.94	Yes 0.3124	Yes 0.5417	Yes 0.6776
79	THPPDTTTTTTTTTTTTAAPATTT	Yes 0.8974	No 0.1412	No 0.475	No 0.5095
80	THPPETTTTTTTTTTTTAAPATTT	Yes 0.8624	No 0.1335	No 0.4833	No 0.4392
81	THPPFTTTTTTTTTTTTAAPATTT	Yes 0.9546	Yes 0.2768	Yes 0.525	Yes 0.661
82	THPPGTTTTTTTTTTTTAAPATTT	Yes 0.9043	Yes 0.2816	Yes 0.525	Yes 0.6601
83	THPPHTTTTTTTTTTTTAAPATTT	Yes 0.9109	Yes 0.2668	Yes 0.5583	Yes 0.5899
84	THPPITTTTTTTTTTTTAAPATTT	Yes 0.9571	Yes 0.3103	Yes 0.5667	Yes 0.6556
85	THPPKTTTTTTTTTTTTAAPATTT	Yes 0.9234	No 0.1306	No 0.4583	Yes 0.5687
86	THPPLTTTTTTTTTTTTAAPATTT	Yes 0.9548	Yes 0.2978	Yes 0.5417	Yes 0.6715
87	THPPMTTTTTTTTTTTTAAPATTT	Yes 0.9183	Yes 0.2685	Yes 0.525	Yes 0.5561
88	THPPNTTTTTTTTTTTTAAPATTT	Yes 0.886	No 0.1393	No 0.4583	Yes 0.5674
89	THPPPTTTTTTTTTTTTAAPATTT	Yes 0.9009	Yes 0.3024	Yes 0.5417	Yes 0.6153
90	THPPQTTTTTTTTTTTTAAPATTT	Yes 0.8844	No 0.1502	No 0.4333	Yes 0.6086
91	THPPRTTTTTTTTTTTTAAPATTT	Yes 0.9401	No 0.114	No 0.4833	Yes 0.5465
92	THPPSTTTTTTTTTTTTAAPATTT	Yes 0.8971	Yes 0.2816	Yes 0.5583	Yes 0.6051
93	THPPVTTTTTTTTTTTTAAPATTT	Yes 0.9683	Yes 0.3103	Yes 0.5417	Yes 0.6693
94	THPPWTTTTTTTTTTTTAAPATTT	Yes 0.9546	Yes 0.2768	Yes 0.525	Yes 0.6443
95	THPPYTTTTTTTTTTTTAAPATTT	Yes 0.9168	Yes 0.2727	No 0.5167	Yes 0.5578
96	THPPTATTTTTTTTTTTAAPATTT	Yes 0.9109	Yes 0.2691	Yes 0.5667	Yes 0.641
97	THPPTCTTTTTTTTTTTAAPATTT	Yes 0.9433	Yes 0.2916	Yes 0.5417	Yes 0.6642
98	THPPTDTTTTTTTTTTTAAPATTT	Yes 0.8874	No 0.1412	No 0.4667	No 0.5034
99	THPPTETTTTTTTTTTTAAPATTT	Yes 0.8584	No 0.1335	No 0.4667	No 0.4497
100	THPPTFTTTTTTTTTTTAAPATTT	Yes 0.9546	Yes 0.2768	No 0.5083	Yes 0.6309
101	THPPTGTTTTTTTTTTTAAPATTT	Yes 0.9109	Yes 0.2816	No 0.5167	Yes 0.672
102	THPPTHTTTTTTTTTTTAAPATTT	Yes 0.9109	Yes 0.2668	Yes 0.55	Yes 0.5899
103	THPPTITTTTTTTTTTTAAPATTT	Yes 0.9571	Yes 0.2936	Yes 0.575	Yes 0.6656
104	THPPTKTTTTTTTTTTTAAPATTT	Yes 0.9334	No 0.1306	No 0.4	Yes 0.6137
105	THPPTLTTTTTTTTTTTAAPATTT	Yes 0.9548	Yes 0.2811	Yes 0.55	Yes 0.6581
106	THPPTMTTTTTTTTTTTAAPATTT	Yes 0.9311	Yes 0.2685	No 0.5	Yes 0.5308
107	THPPTNTTTTTTTTTTTAAPATTT	Yes 0.8793	No 0.1393	No 0.4667	Yes 0.5626
108	THPPTPTTTTTTTTTTTAAPATTT	Yes 0.8966	Yes 0.3024	Yes 0.5417	Yes 0.6153
109	THPPTQTTTTTTTTTTTAAPATTT	Yes 0.8984	No 0.1502	No 0.425	Yes 0.6051
110	THPPTRTTTTTTTTTTTAAPATTT	Yes 0.9401	No 0.114	No 0.425	Yes 0.5654
111	THPPTSTTTTTTTTTTTAAPATTT	Yes 0.8896	Yes 0.2816	Yes 0.5583	Yes 0.6051
112	THPPTVTTTTTTTTTTTAAPATTT	Yes 0.9683	Yes 0.2936	Yes 0.55	Yes 0.6684
113	THPPTWTTTTTTTTTTTAAPATTT	Yes 0.9435	Yes 0.2768	No 0.5083	Yes 0.6309
114	THPPTYTTTTTTTTTTTAAPATTT	Yes 0.9106	Yes 0.2727	No 0.5	Yes 0.5491
115	THPPTTATTTTTTTTTTAAPATTT	Yes 0.9109	Yes 0.2649	Yes 0.5667	Yes 0.6281
116	THPPTTCTTTTTTTTTTAAPATTT	Yes 0.9533	Yes 0.2874	Yes 0.55	Yes 0.6263
117	THPPTTDTTTTTTTTTTAAPATTT	Yes 0.8974	No 0.1412	No 0.475	No 0.4974
118	THPPTTETTTTTTTTTTAAPATTT	Yes 0.8684	No 0.1085	No 0.4917	No 0.4675
119	THPPTTFTTTTTTTTTTAAPATTT	Yes 0.9546	Yes 0.2768	No 0.5167	Yes 0.5929
120	THPPTTGTTTTTTTTTTAAPATTT	Yes 0.9109	Yes 0.2774	Yes 0.5417	Yes 0.6479
121	THPPTTHTTTTTTTTTTAAPATTT	Yes 0.9109	Yes 0.2668	Yes 0.5417	Yes 0.5899
122	THPPTTITTTTTTTTTTAAPATTT	Yes 0.9571	Yes 0.2644	Yes 0.575	Yes 0.6308
123	THPPTTKTTTTTTTTTTAAPATTT	Yes 0.9434	No 0.1306	No 0.4083	Yes 0.6026
124	THPPTTLTTTTTTTTTTAAPATTT	Yes 0.9648	Yes 0.2769	Yes 0.55	Yes 0.6281
125	THPPTTMTTTTTTTTTTAAPATTT	Yes 0.9311	Yes 0.2685	No 0.5083	Yes 0.5272
126	THPPTTNTTTTTTTTTTAAPATTT	Yes 0.8893	No 0.1393	No 0.4583	Yes 0.5681
127	THPPTTPTTTTTTTTTTAAPATTT	Yes 0.8966	Yes 0.2982	Yes 0.525	Yes 0.6153
128	THPPTTQTTTTTTTTTTAAPATTT	Yes 0.9084	No 0.1502	No 0.4083	Yes 0.6107
129	THPPTTRTTTTTTTTTTAAPATTT	Yes 0.9501	No 0.114	No 0.4333	Yes 0.5543
130	THPPTTSTTTTTTTTTTAAPATTT	Yes 0.8896	Yes 0.2816	Yes 0.5583	Yes 0.6051
131	THPPTTVTTTTTTTTTTAAPATTT	Yes 0.9683	Yes 0.2894	Yes 0.55	Yes 0.6336
132	THPPTTWTTTTTTTTTTAAPATTT	Yes 0.9435	Yes 0.2768	No 0.5167	Yes 0.5929
133	THPPTTYTTTTTTTTTTAAPATTT	Yes 0.9106	Yes 0.2727	No 0.5083	Yes 0.5491
134	THPPTTTTTATTTTTTTAAPATTT	Yes 0.9009	Yes 0.2649	Yes 0.5583	Yes 0.6105
135	THPPTTTTTCTTTTTTTAAPATTT	Yes 0.9533	Yes 0.2874	No 0.5	Yes 0.5952
136	THPPTTTTTDTTTTTTTAAPATTT	Yes 0.859	No 0.1575	No 0.4833	No 0.5025
137	THPPTTTTTETTTTTTTAAPATTT	Yes 0.845	No 0.1097	No 0.5	No 0.4923
138	THPPTTTTTFTTTTTTTAAPATTT	Yes 0.9546	Yes 0.3253	No 0.4917	Yes 0.559
139	THPPTTTTTGTTTTTTTAAPATTT	Yes 0.9109	Yes 0.2774	Yes 0.5417	Yes 0.6322
140	THPPTTTTTHTTTTTTTAAPATTT	Yes 0.8995	Yes 0.3153	Yes 0.55	Yes 0.5668
141	THPPTTTTTITTTTTTTAAPATTT	Yes 0.9521	Yes 0.2644	Yes 0.525	Yes 0.632
142	THPPTTTTTKTTTTTTTAAPATTT	Yes 0.9189	Yes 0.2204	No 0.425	Yes 0.6097
143	THPPTTTTTLTTTTTTTAAPATTT	Yes 0.9498	Yes 0.2769	No 0.5	Yes 0.6334
144	THPPTTTTTMTTTTTTTAAPATTT	Yes 0.9211	Yes 0.3169	No 0.4917	Yes 0.5114
145	THPPTTTTTNTTTTTTTAAPATTT	Yes 0.8848	No 0.1227	No 0.4833	Yes 0.586
146	THPPTTTTTPTTTTTTTAAPATTT	Yes 0.8966	Yes 0.2982	Yes 0.525	Yes 0.6203
147	THPPTTTTTQTTTTTTTAAPATTT	Yes 0.9839	NO 0.146	NO 0.4583	Yes 0.6186
148	THPPTTTTTRTTTTTTTAAPATTT	Yes 0.9255	Yes 0.2037	NO 0.45	Yes 0.5614
149	THPPTTTTTSTTTTTTTAAPATTT	YES 0.8896	Yes 0.2816	YES 0.5583	Yes 0.6006
150	THPPTTTTTVTTTTTTTAAPATTT	YES 0.9633	YES 0.2894	NO 0.5083	YES 0.6348
151	THPPTTTTTWTTTTTTTAAPATTT	YES 0.9435	YES 0.3253	NO 0.5	YES 0.559
152	THPPTTTTTYTTTTTTTAAPATTT	YES 0.9106	YES 0.3211	NO 0.5	YES 0.5458
153	THPPTTTTTTATTTTTTAAPATTT	YES 0.9009	YES 0.2649	YES 0.55	YES 0.6105
154	THPPTTTTTTCTTTTTTAAPATTT	YES 0.9533	YES 0.2874	NO 0.4833	YES 0.588
155	THPPTTTTTTDTTTTTTAAPATTT	YES 0.849	NO 0.1725	NO 0.4667	NO 0.4673
156	THPPTTTTTTETTTTTTAAPATTT	YES 0.825	NO 0.1247	NO 0.475	NO 0.4671
157	THPPTTTTTTFTTTTTTAAPATTT	YES 0.9546	YES 0.3253	NO 0.4833	YES 0.5519
158	THPPTTTTTTGTTTTTTAAPATTT	YES 0.9034	YES 0.2774	YES 0.5417	YES 0.6322
159	THPPTTTTTTHTTTTTTAAPATTT	YES 0.8995	YES 0.3153	YES 0.5417	YES 0.5668
160	THPPTTTTTTITTTTTTAAPATTT	YES 0.9521	YES 0.2644	NO 0.5083	YES 0.6263
161	THPPTTTTTTKTTTTTTAAPATTT	YES 0.9189	YES 0.2354	NO 0.4333	YES 0.5989
162	THPPTTTTTTLTTTTTTAAPATTT	YES 0.9498	YES 0.2769	NO 0.4917	YES 0.6277
163	THPPTTTTTTMTTTTTTAAPATTT	YES 0.9211	YES 0.3169	NO 0.4833	NO 0.5843
164	THPPTTTTTTNTTTTTTAAPATTT	YES 0.8848	NO 0.1377	NO 0.5	YES 0.5681
165	THPPTTTTTTPTTTTTTAAPATTT	YES 0.8891	YES 0.2982	YES 0.525	YES 0.6203
166	THPPTTTTTTQTTTTTTAAPATTT	YES 0.9039	NO 0.361	NO 0.4583	YES 0.5945
167	THPPTTTTTTRTTTTTTAAPATTT	YES 0.9255	YES 0.2197	NO 0.45	YES 0.5206
168	THPPTTTTTTSTTTTTTAAPATTT	YES 0.8821	YES 0.2816	YES 0.5583	YES 0.6006
169	THPPTTTTTTVTTTTTTAAPATTT	YES 0.9633	YES 0.2894	NO 0.4917	YES 0.6291
170	THPPTTTTTTWTTTTTTAAPATTT	YES 0.9435	YES 0.3253	NO 0.4833	YES 0.5519
171	THPPTTTTTTYTTTTTTAAPATTT	YES 0.9106	YES 0.3211	NO 0.4917	YES 0.5291
172	THPPTTTTTTTATTTTTAAPATTT	YES 0.9009	YES 0.2649	YES 0.55	YES 0.6135
173	THPPTTTTTTTCTTTTTAAPATTT	YES 0.9533	YES 0.2874	NO 0.4833	YES 0.5905
174	THPPTTTTTTTDTTTTTAAPATTT	YES 0.849	NO 0.16	NO 0.475	NO 0.4673
175	THPPTTTTTTTETTTTTAAPATTT	YES 0.815	NO 0.1063	NO 0.4917	NO 0.4504
176	THPPTTTTTTTFTTTTTAAPATTT	YES 0.9546	YES 0.3253	NO 0.4833	YES 0.5442
177	THPPTTTTTTTGTTTTTAAPATTT	YES 0.9034	YES 0.2774	YES 0.5417	YES 0.626
178	THPPTTTTTTTHTTTTTAAPATTT	YES 0.8995	YES 0.3153	YES 0.5417	YES 0.576
179	THPPTTTTTTTITTTTTAAPATTT	YES 0.9521	YES 0.2629	NO 0.5167	YES 0.6158
180	THPPTTTTTTTKTTTTTAAPATTT	YES 0.9022	YES 0.2354	NO 0.45	YES 0.5989
181	THPPTTTTTTTLTTTTTAAPATTT	YES 0.9498	YES 0.2754	NO 0.4917	YES 0.6172
182	THPPTTTTTTTMTTTTTAAPATTT	YES 0.9286	YES 0.3169	NO 0.475	NO 0.5028
183	THPPTTTTTTTNTTTTTAAPATTT	YES 0.8748	NO 0.1111	NO 0.4917	YES 0.5515
184	THPPTTTTTTTPTTTTTAAPATTT	YES 0.8791	YES 0.2982	YES 0.525	YES 0.6305
185	THPPTTTTTTTQTTTTTAAPATTT	YES 0.8939	NO 0.1594	NO 0.4583	YES 0.5778
186	THPPTTTTTTTRTTTTTAAPATTT	YES 0.9089	YES 0.2187	NO 0.4667	YES 0.5206
187	THPPTTTTTTTSTTTTTAAPATTT	YES 0.8821	YES 0.2816	YES 0.5583	YES 0.6006
188	THPPTTTTTTTVTTTTTAAPATTT	YES 0.9633	YES 0.2879	NO 0.4917	YES 0.6047
189	THPPTTTTTTTWTTTTTAAPATTT	YES 0.9435	YES 0.3253	NO 0.4833	YES 0.5429
190	THPPTTTTTTTYTTTTTAAPATTT	YES 0.9106	YES 0.3211	NO 0.4917	YES 0.5291
191	THPPTTTTTTTTATTTTAAPATTT	YES 0.9009	YES 0.2649	YES 0.55	YES 0.6135
192	THPPTTTTTTTTCTTTTAAPATTT	YES 0.9533	YES 0.2874	NO 0.4917	YES 0.6085
193	THPPTTTTTTTTDTTTTAAPATTT	YES 0.849	NO 0.16	NO 0.4833	NO 0.4673
194	THPPTTTTTTTTETTTTAAPATTT	YES 0.815	NO 0.1053	NO 0.5083	NO 0.4812
195	THPPTTTTTTTTFTTTTAAPATTT	YES 0.9546	YES 0.3503	NO 0.4917	YES 0.5585
196	THPPTTTTTTTTGTTTTAAPATTT	YES 0.9034	YES 0.2774	YES 0.5417	YES 0.626
197	THPPTTTTTTTTHTTTTAAPATTT	YES 0.8995	YES 0.3403	YES 0.55	YES 0.6093
198	THPPTTTTTTTTITTTTAAPATTT	YES 0.9521	YES 0.2629	YES 0.5333	YES 0.6193
199	THPPTTTTTTTTKTTTTAAPATTT	YES 0.8989	YES 0.2604	NO 0.45	YES 0.6277
200	THPPTTTTTTTTLTTTTAAPATTT	YES 0.9498	YES 0.2754	NO 0.5083	YES 0.6207
201	THPPTTTTTTTTMTTTTAAPATTT	YES 0.9286	YES 0.3419	NO 0.4667	YES 0.5505
202	THPPTTTTTTTTNTTTTAAPATTT	YES 0.8748	NO 0.1111	NO 0.5083	YES 0.5848
203	THPPTTTTTTTTPTTTTAAPATTT	YES 0.8891	YES 0.2982	YES 0.5333	YES 0.643
204	THPPTTTTTTTTQTTTTAAPATTT	YES 0.8928	NO 0.1594	NO 0.4833	YES 0.5758
205	THPPTTTTTTTTRTTTTAAPATTT	YES 0.9055	YES 0.2437	NO 0.4583	YES 0.5431
206	THPPTTTTTTTTSTTTTAAPATTT	YES 0.8821	YES 0.2816	YES 0.5583	YES 0.6006
207	THPPTTTTTTTTVTTTTAAPATTT	YES 0.9633	YES 0.2879	NO 0.5083	YES 0.6082
208	THPPTTTTTTTTWTTTTAAPATTT	YES 0.9435	YES 0.3503	NO 0.4917	YES 0.5572
209	THPPTTTTTTTTYTTTTAAPATTT	YES 0.9106	YES 0.3461	NO 0.4917	YES 0.5712
210	THPPTTTTTTTTTATTTAAPATTT	YES 0.9009	YES 0.2649	YES 0.55	YES 0.6135
211	THPPTTTTTTTTTCTTTAAPATTT	YES 0.9533	YES 0.2874	NO 0.5	YES 0.6037
212	THPPTTTTTTTTTDTTTAAPATTT	YES 0.8473	NO 0.16	NO 0.4833	NO 0.4673
213	THPPTTTTTTTTTETTTAAPATTT	YES 0.815	NO 0.1053	NO 0.5167	NO 0.4773
214	THPPTTTTTTTTTFTTTAAPATTT	YES 0.9546	YES 0.3503	NO 0.5	YES 0.5537
215	THPPTTTTTTTTTGTTTAAPATTT	YES 0.9074	YES 0.2774	YES 0.5417	YES 0.626
216	THPPTTTTTTTTTHTTTAAPATTT	YES 0.8995	YES 0.3403	YES 0.55	YES 0.6893
217	THPPTTTTTTTTTITTTAAPATTT	YES 0.9521	YES 0.2629	YES 0.5417	YES 0.6145
218	THPPTTTTTTTTTKTTTAAPATTT	YES 0.8989	YES 0.2604	NO 0.4667	YES 0.6277
219	THPPTTTTTTTTTLTTTAAPATTT	YES 0.9498	YES 0.2754	NO 0.5167	YES 0.6159
220	THPPTTTTTTTTTMTTTAAPATTT	YES 0.9286	YES 0.3419	NO 0.475	YES 0.5457
221	THPPTTTTTTTTTNTTTAAPATTT	YES 0.8688	NO 0.1111	YES 0.525	YES 0.5851
222	THPPTTTTTTTTTPTTTAAPATTT	YES 0.8831	YES 0.2982	YES 0.525	YES 0.643
223	THPPTTTTTTTTTQTTTAAPATTT	YES 0.8928	NO 0.1469	NO 0.4917	YES 0.5761
224	THPPTTTTTTTTTRTTTAAPATTT	YES 0.9055	YES 0.2437	NO 0.475	YES 0.5431
225	THPPTTTTTTTTTSTTTAAPATTT	YE 0.8861	YE0.2861	YES 0.5583	YES 0.6006
226	THPPTTTTTTTTTVTTTAAPATTT	YES 0.9633	YES 0.2879	NO 0.5167	YES 0.6034
227	THPPTTTTTTTTTWTTTAAPATTT	YES 0.9435	YES 0.3503	NO 0.5	YES 0..5525
228	THPPTTTTTTTTTYTTTAAPATTT	YES 0.9106	YES 0.3461	NO 0.4917	YES 0.5665
229	THPPTTTTTTTTTTATTAAPATTT	YES 0.9009	YES 0.2774	YES 0.55	YES 0.6051
230	THPPTTTTTTTTTTCTTAAPATTT	YES 0.9533	YES 0.2874	NO 0.5083	YES 0.6211
231	THPPTTTTTTTTTTDTTAAPATTT	YES 0.8573	NO 0.16	NO 0.475	NO 0.4679
232	THPPTTTTTTTTTTETTAAPATTT	YES 0.8	NO 0.1178	NO 0.4833	NO 0.4901
233	THPPTTTTTTTTTTFTTAAPATTT	YES 0.9546	YES 0.3503	NO 0.5083	YES 0.5711
234	THPPTTTTTTTTTTGTTAAPATTT	YES 0.9074	YES 0.2774	YES 0.5417	YES 0.6116
235	THPPTTTTTTTTTTHTTAAPATTT	YES 0.8995	YES 0.3278	YES 0.55	YES 0.6024
236	THPPTTTTTTTTTTITTAAPATTT	yes 0.9421	YES 0.2629	YES 0.5417	YES 0.6277
237	THPPTTTTTTTTTTKTTAAPATTT	YES 0.8989	YES 0.2501	NO 0.4833	YES 0.6027
238	THPPTTTTTTTTTTLTTAAPATTT	YES 0.9398	YES0.2879	NO 0.5167	YES 0.6499
239	THPPTTTTTTTTTTMTTAAPATTT	YES 0.9286	YES 0.3544	NO 0.4833	YES 0.5547
240	THPPTTTTTTTTTTNTTAAPATTT	YES 0.8588	NO 0.1111	YES 0.525	YES 0.579
241	THPPTTTTTTTTTTPTTAAPATTT	YES 0.8731	YES 0.2982	YES 0.525	YES 0.643
242	THPPTTTTTTTTTTQTTAAPATTT	YES 0.8728	NO 0.1594	NO 0.4917	YES 0.5853
243	THPPTTTTTTTTTTRTTAAPATTT	YES 0.9055	YES 0.2334	NO 0.4917	YES 0.532
244	THPPTTTTTTTTTTSTTAAPATTT	YES 0.8861	YES 0.2816	YES 0.5583	YES 0.6006
245	THPPTTTTTTTTTTVTTAAPATTT	YES 0.9533	YES 0.2879	NO 0.5167	YES 0.6332
246	THPPTTTTTTTTTTWTTAAPATTT	YES 0.9435	YES 0.3503	NO 0.5083	YES 0.5698
247	THPPTTTTTTTTTTYTTAAPATTT	YES 0.9196	YES 0.3461	NO 0.4917	YES 0.6081
248	THPPTTTTTTTTTTTATAAPATTT	YES 0.9009	YES 0.2816	YES 0.5667	YES 0.6051
249	THPPTTTTTTTTTTTCTAAPATTT	YES 0.9533	YES 0.3082	NO 0.5	YES 0.6211
250	THPPTTTTTTTTTTTDTAAPATTT	YES 0.8573	NO 0.16	NO 0.475	NO 0.4471
251	THPPTTTTTTTTTTTETAAPATTT	YES 0.7978	NO 0.1178	NO 0.475	NO 0.4848
252	THPPTTTTTTTTTTTFTAAPATTT	YES 0.9546	YES 0.3711	NO 0.5	YES 0.5711
253	THPPTTTTTTTTTTTGTAAPATTT	YES 0.9074	YES 0.2816	YES 0.55	YES 0.6227
254	THPPTTTTTTTTTTTHTAAPATTT	YES 0.8995	YES 0.3278	YES 0.55	YES 0.6024
255	THPPTTTTTTTTTTTITAAPATTT	YES 0.9421	YES 0.3129	YES 0.55	YES 0.6384
256	THPPTTTTTTTTTTTKTAAPATTT	YES 0.8989	YES 0.2501	NO 0.5083	YES 0.5932
257	THPPTTTTTTTTTTTLTAAPATTT	YES 0.9398	YES 0.3129	YES 0.525	YES 0.6481
258	THPPTTTTTTTTTTTMTAAPATTT	YES 0.9286	YES 0.3753	NO 0.475	YES 0.5547
259	THPPTTTTTTTTTTTNTAAPATTT	YES 0.8588	NO 0.1111	YES 0.5417	YES 0.5624
260	THPPTTTTTTTTTTTPTAAPATTT	YES 0.8731	YES 0.2982	YES 0.525	YES 0.643
261	THPPTTTTTTTTTTTQTAAPATTT	YES 0.8728	NO 0.1428	NO 0.475	YES 0.5686
262	THPPTTTTTTTTTTTRTAAPATTT	YES 0.9055	YES 0.2334	NO 0.5167	YES 0.5225
263	THPPTTTTTTTTTTTSTAAPATTT	YES 0.8861	YES 0.2816	YES 0.5583	YES 0.6006
264	THPPTTTTTTTTTTTVTAAPATTT	YES 0.9533	YES 0.3129	YES 0.525	YES 0.6465
265	THPPTTTTTTTTTTTWTAAPATTT	YES 0.9435	YES 0.3711	NO 0.5	YES 0.5698
266	THPPTTTTTTTTTTTYTAAPATTT	YES 0.9106	YES 0.3711	NO 0.4833	YES 0.6081
267	THPPTTTTTTTTTTTTAAAPATTT	YES 0.9089	YES 0.2816	YES 0.5667	YES 0.6051
268	THPPTTTTTTTTTTTTCAAPATTT	YES 0.9546	YES 0.2862	NO 0.5167	YES 0.6211
269	THPPTTTTTTTTTTTTDAAPATTT	YES 0.8511	NO 0.16	NO 0.4583	NO 0.4471
270	THPPTTTTTTTTTTTTEAAPATTT	YES 0.7953	NO 0.1149	NO 0.4667	NO 0.4848
271	THPPTTTTTTTTTTTTFAAPATTT	YES 0.9546	YES 0.349	YES 0.525	YES 0.5711
272	THPPTTTTTTTTTTTTGAAPATTT	YES 0.8974	YES 0.2816	YES 0.5667	YES 0..606
273	THPPTTTTTTTTTTTTHAAPATTT	YES 0.8962	YES 0.3278	YES 0.55	YES 0.5857
274	THPPTTTTTTTTTTTTIAAPATTT	YES 0.9267	YES 0.2908	YES 0.575	YES 0.6384
275	THPPTTTTTTTTTTTTKAAPATTT	YES 0.8989	YES 0.2501	NO 0.5	YES 0.5549
276	THPPTTTTTTTTTTTTLAAPATTT	YES 0.9083	YES 0.2908	YES 0.55	YES 0.6481
277	THPPTTTTTTTTTTTTMAAPATTT	YES 0.9236	YES 0.3532	NO 0.5	YES 0.5381
278	THPPTTTTTTTTTTTTNAAPATTT	YES 0.8488	NO 0.1111	YES 0.5417	YES 0.5728
279	THPPTTTTTTTTTTTTPAAPATTT	YES 0.8731	YES 0.2982	YES 0.525	YES 0.643
280	THPPTTTTTTTTTTTTQAAPATTT	YES 0.8628	NO 0.1428	NO 0.4583	YES 0.579
281	THPPTTTTTTTTTTTTRAAPATTT	YES 0.9055	YES 0.2334	NO 0.4917	YES 0.5225
282	THPPTTTTTTTTTTTTSAAPATTT	YES 0.8861	YES 0.2816	YES 0.55	YES 0.5839
283	THPPTTTTTTTTTTTTVAAPATTT	0.9383	0.2908	0.5417	0.6366
284	THPPTTTTTTTTTTTTWAAPATTT	0.9435	0.349	0.525	0.5698
285	THPPTTTTTTTTTTTTYAAPATTT	0.8996	0.3711	0.475	0.6081
286	THPPTTTTTTTTTTTTTCAPATTT	0.9646	0.2778	0.5333	0.583
287	THPPTTTTTTTTTTTTTDAPATTT	0.8611	0.1552	0.4583	0.4522
288	THPPTTTTTTTTTTTTTEAPATTT	0.8033	0.1399	0.4833	0.4431
289	THPPTTTTTTTTTTTTTFAPATTT	0.9646	0.3365	0.5417	0.5663
290	THPPTTTTTTTTTTTTTGAPATTT	0.9008	0.2691	0.5833	0.5749
291	THPPTTTTTTTTTTTTTHAPATTT	0.8962	0.3278	0.5583	0.5774
292	THPPTTTTTTTTTTTTTIAPATTT	0.9508	0.2783	0.575	0.6
293	THPPTTTTTTTTTTTTTKAPATTT	0.8989	0.2501	0.5083	0.5815
294	THPPTTTTTTTTTTTTTLAPATTT	0.9375	0.2908	0.5083	0.6481
295	THPPTTTTTTTTTTTTTMAPATTT	0.9236	0.3532	0.475	0.5381
296	THPPTTTTTTTTTTTTTNAPATTT	0.8609	0.1063	0.5333	0.5775
297	THPPTTTTTTTTTTTTTPAPATTT	0.8665	0.2899	0.5	0.6302
298	THPPTTTTTTTTTTTTTQAPATTT	0.8628	0.1594	0.4417	0.5912
299	THPPTTTTTTTTTTTTTRAPATTT	0.9055	0.2334	0.5	0.543
300	THPPTTTTTTTTTTTTTSAPATTT	0.8894	0.2691	0.5583	0.5945
301	THPPTTTTTTTTTTTTTTAPATTT	0.9109	0.2691	0.575	0.5908
302	THPPTTTTTTTTTTTTTVAPATTT	0.9575	0.2783	0.5417	0.5982
303	THPPTTTTTTTTTTTTTWAPATTT	0.9535	0.3365	0.55	0.5651
304	THPPTTTTTTTTTTTTTYAPATTT	0.9096	0.3586	0.4833	0.6228
305	THPPTTTTTTTTTTTTTACPATTT	0.9589	0.2862	0.5167	0.5924
306	THPPTTTTTTTTTTTTTADPATTT	0.863	0.1632	0.4667	0.4638
307	THPPTTTTTTTTTTTTTAEPATTT	0.8108	0.1347	0.4833	0.4548
308	THPPTTTTTTTTTTTTTAFPATTT	0.9646	0.349	0.5333	0.5757
309	THPPTTTTTTTTTTTTTAGPATTT	0.9008	0.2691	0.6	0.6245
310	THPPTTTTTTTTTTTTTAHPATTT	0.8995	0.3278	0.55	0.5724
311	THPPTTTTTTTTTTTTTAIPATTT	0.94	0.2908	0.5417	0.5904
312	THPPTTTTTTTTTTTTTAKPATTT	0.9022	0.2884	0.5167	0.5913
313	THPPTTTTTTTTTTTTTALPATTT	0.9283	0.2908	0.5	0.6478
314	THPPTTTTTTTTTTTTTAMPATTT	0.918	0.3532	0.475	0.5507
315	THPPTTTTTTTTTTTTTANPATTT	0.8559	0.1179	0.525	0.6058
316	THPPTTTTTTTTTTTTTAPPATTT	0.8608	0.2732	0.5167	0.6252
317	THPPTTTTTTTTTTTTTAQPATTT	0.8678	0.1763	0.4417	0.6195
318	THPPTTTTTTTTTTTTTARPATTT	0.9022	0.2718	0.5167	0.5547
319	THPPTTTTTTTTTTTTTASPATTT	0.8844	0.2691	0.575	0.5618
320	THPPTTTTTTTTTTTTTATPATTT	0.9066	0.2691	0.575	0.5858
321	THPPTTTTTTTTTTTTTAVPATTT	0.9575	0.2908	0.5333	0.6007
322	THPPTTTTTTTTTTTTTAWPATTT	0.9612	0.349	0.5417	0.5744
323	THPPTTTTTTTTTTTTTAYPATTT	0.9248	0.3586	0.4917	0.6095
324	THPPTTTTTTTTTTTTTAAAATTT	0.9127	0.2816	0.5583	0.5931
325	THPPTTTTTTTTTTTTTAACATTT	0.9583	0.2831	0.4917	0.5889
326	THPPTTTTTTTTTTTTTAADATTT	0.8331	0.1857	0.5083	0.4227
327	THPPTTTTTTTTTTTTTAAEATTT	0.8313	0.1861	0.5167	0.505
328	THPPTTTTTTTTTTTTTAAFATTT	0.9483	0.2798	0.525	0.5802
329	THPPTTTTTTTTTTTTTAAGATTT	0.9113	0.2816	0.55	0.6421
330	THPPTTTTTTTTTTTTTAAHATTT	0.8999	0.271	0.5583	0.535
331	THPPTTTTTTTTTTTTTAAIATTT	0.9183	0.2877	0.5	0.5916
332	THPPTTTTTTTTTTTTTAAKATTT	0.896	0.1978	0.5667	0.5977
333	THPPTTTTTTTTTTTTTAALATTT	0.9433	0.2877	0.5083	0.6017
334	THPPTTTTTTTTTTTTTAAMATTT	0.9247	0.2923	0.4667	0.5867
335	THPPTTTTTTTTTTTTTAANATTT	0.886	0.1961	0.5583	0.5827
336	THPPTTTTTTTTTTTTTAAQATTT	0.8951	0.1861	0.5	0.6021
337	THPPTTTTTTTTTTTTTAARATTT	0.906	0.1811	0.5417	0.5191
338	THPPTTTTTTTTTTTTTAASATTT	0.8933	0.2941	0.55	0.5697
339	THPPTTTTTTTTTTTTTAATATTT	0.9047	0.2941	0.5583	0.5808
340	THPPTTTTTTTTTTTTTAAVATTT	0.9283	0.2877	0.4917	0.6041
341	THPPTTTTTTTTTTTTTAAWATTT	0.955	0.2756	0.5083	0.5789
342	THPPTTTTTTTTTTTTTAAYATTT	0.9076	0.3143	0.4917	0.5819
343	THPPTTTTTTTTTTTTTAAPCTTT	0.9638	0.2945	0.5	0.559
344	THPPTTTTTTTTTTTTTAAPDTTT	0.8608	0.1632	0.475	0.5199
345	THPPTTTTTTTTTTTTTAAPETTT	0.767	0.1347	0.4917	0.5405
346	THPPTTTTTTTTTTTTTAAPFTTT	0.9683	0.349	0.5167	0.5679
347	THPPTTTTTTTTTTTTTAAPGTTT	0.9145	0.2691	0.5667	0.6222
348	THPPTTTTTTTTTTTTTAAPHTTT	0.9032	0.3278	0.5333	0.564
349	THPPTTTTTTTTTTTTTAAPITTT	0.9471	0.2908	0.525	0.585
350	THPPTTTTTTTTTTTTTAAPKTTT	0.8876	0.2934	0.525	0.6421
351	THPPTTTTTTTTTTTTTAAPLTTT	0.9348	0.2908	0.475	0.6311
352	THPPTTTTTTTTTTTTTAAPMTTT	0.9196	0.3532	0.4583	0.5146
353	THPPTTTTTTTTTTTTTAAPNTTT	0.8575	0.1179	0.5833	0.6252
354	THPPTTTTTTTTTTTTTAAPPTTT	0.8645	0.2732	0.5	0.6502
355	THPPTTTTTTTTTTTTTAAPQTTT	0.8538	0.1597	0.4917	0.6389
356	THPPTTTTTTTTTTTTTAAPRTTT	0.9043	0.2768	0.5417	0.5824
357	THPPTTTTTTTTTTTTTAAPSTTT	0.9007	0.2691	0.5583	0.5979
358	THPPTTTTTTTTTTTTTAAPTTTT	0.9147	0.2691	0.5583	0.5941
359	THPPTTTTTTTTTTTTTAAPVTTT	0.9583	0.2908	0.5	0.5857
360	THPPTTTTTTTTTTTTTAAPWTTT	0.9683	0.349	0.525	0.55
361	THPPTTTTTTTTTTTTTAAPYTTT	0.9343	0.3586	0.475	0.6095
362	THPPTTTTTTTTTTTTTAAPAATT	0.9009	0.2816	0.5833	0.615
363	THPPTTTTTTTTTTTTTAAPACTT	0.9533	0.2778	0.4583	0.5582
364	THPPTTTTTTTTTTTTTAAPADTT	0.8313	0.2583	0.4417	0.4853
365	THPPTTTTTTTTTTTTTAAPAETT	0.7996	0.2328	0.4833	0.5455
366	THPPTTTTTTTTTTTTTAAPAFTT	0.9546	0.349	0.4917	0.5338
367	THPPTTTTTTTTTTTTTAAPAGTT	0.9008	0.2816	0.5667	0.6571
368	THPPTTTTTTTTTTTTTAAPAHTT	0.8995	0.3278	0.5583	0.564
369	THPPTTTTTTTTTTTTTAAPAITT	0.9271	0.2783	0.4917	0.5796
370	THPPTTTTTTTTTTTTTAAPAKTT	0.8939	0.3826	0.55	0.6296
371	THPPTTTTTTTTTTTTTAAPALTT	0.9248	0.2783	0.475	0.6026
372	THPPTTTTTTTTTTTTTAAPAMTT	0.926	0.3532	0.4417	0.5146
373	THPPTTTTTTTTTTTTTAAPANTT	0.8768	0.2219	0.55	0.6321
374	THPPTTTTTTTTTTTTTAAPAPTT	0.8583	0.3024	0.5167	0.6226
375	THPPTTTTTTTTTTTTTAAPAQTT	0.8833	0.2244	0.4833	0.6273
376	THPPTTTTTTTTTTTTTAAPARTT	0.8939	0.3659	0.55	0.5824
377	THPPTTTTTTTTTTTTTAAPASTT	0.8794	0.2816	0.55	0.5923
378	THPPTTTTTTTTTTTTTAAPAVTT	0.9483	0.2783	0.4833	0.6026
379	THPPTTTTTTTTTTTTTAAPAWTT	0.9512	0.349	0.4917	0.5325
380	THPPTTTTTTTTTTTTTAAPAYTT	0.9186	0.3711	0.45	0.5865
381	THPPTTTTTTTTTTTTTAAPATAT	0.8909	0.2816	0.575	0.6317
382	THPPTTTTTTTTTTTTTAAPATCT	0.9633	0.2778	0.4833	0.5416
383	THPPTTTTTTTTTTTTTAAPATDT	0.8306	0.2753	0.4417	0.4853
384	THPPTTTTTTTTTTTTTAAPATET	0.7965	0.2234	0.475	0.5855
385	THPPTTTTTTTTTTTTTAAPATFT	0.9462	0.3532	0.5	0.5317
386	THPPTTTTTTTTTTTTTAAPATGT	0.9008	0.2816	0.5583	0.6242
387	THPPTTTTTTTTTTTTTAAPATHT	0.8912	0.3278	0.5667	0.5807
388	THPPTTTTTTTTTTTTTAAPATIT	0.9271	0.2783	0.5167	0.5629
389	THPPTTTTTTTTTTTTTAAPATKT	0.8939	0.3954	0.5417	0.6229
390	THPPTTTTTTTTTTTTTAAPATLT	0.9448	0.2783	0.5	0.5998
391	THPPTTTTTTTTTTTTTAAPATMT	0.9202	0.3532	0.4583	0.557
392	THPPTTTTTTTTTTTTTAAPATNT	0.8828	0.2609	0.55	0.6114
393	THPPTTTTTTTTTTTTTAAPATPT	0.864	0.3024	0.5083	0.6004
394	THPPTTTTTTTTTTTTTAAPATQT	0.8919	0.2234	0.5	0.6399
395	THPPTTTTTTTTTTTTTAAPATRT	0.8965	0.3787	0.5417	0.6061
396	THPPTTTTTTTTTTTTTAAPATST	0.8794	0.2816	0.5583	0.5923
397	THPPTTTTTTTTTTTTTAAPATVT	0.9483	0.2783	0.5	0.5859
398	THPPTTTTTTTTTTTTTAAPATWT	0.9285	0.349	0.5	0.5304
399	THPPTTTTTTTTTTTTTAAPATYT	0.9022	0.3711	0.45	0.6011
400	THPPTTTTTTTTTTTTTAAPATTA	0.8909	0.2816	0.5833	0.6321
401	THPPTTTTTTTTTTTTTAAPATTC	0.9588	0.2766	0.475	0.5626
402	THPPTTTTTTTTTTTTTAAPATTD	0.8176	0.3854	0.4667	0.5335
403	THPPTTTTTTTTTTTTTAAPATTE	0.7979	0.3753	0.4917	0.6004
404	THPPTTTTTTTTTTTTTAAPATTF	0.9442	0.3613	0.5	0.5461
405	THPPTTTTTTTTTTTTTAAPATTG	0.8908	0.2816	0.575	0.658
406	THPPTTTTTTTTTTTTTAAPATTH	0.8891	0.3528	0.5917	0.5745
407	THPPTTTTTTTTTTTTTAAPATTI	0.9336	0.302	0.4833	0.584
408	THPPTTTTTTTTTTTTTAAPATTK	0.9022	0.3871	0.55	0.6507
409	THPPTTTTTTTTTTTTTAAPATTL	0.9336	0.3062	0.4917	0.607
410	THPPTTTTTTTTTTTTTAAPATTM	0.9142	0.3655	0.4417	0.5549
411	THPPTTTTTTTTTTTTTAAPATTN	0.8666	0.3109	0.5583	0.6306
412	THPPTTTTTTTTTTTTTAAPATTP	0.8607	0.2982	0.525	0.6108
413	THPPTTTTTTTTTTTTTAAPATTQ	0.9004	0.2734	0.5167	0.6285
414	THPPTTTTTTTTTTTTTAAPATTR	0.9088	0.3704	0.5583	0.6024
415	THPPTTTTTTTTTTTTTAAPATTS	0.8794	0.2816	0.5833	0.6027
416	THPPTTTTTTTTTTTTTAAPATTV	0.9336	0.3062	0.475	0.607
417	THPPTTTTTTTTTTTTTAAPATTW	0.9331	0.3613	0.4917	0.5448
418	THPPTTTTTTTTTTTTTAAPATTY	0.9001	0.3834	0.4333	0.5845

## Sheet: CAMP
		CAMP R3
S.no	AMPs Sequence	TYPE (Random Forest)
1	AHPPTTTTTTTTTTTTTAAPATTT	AMP
2	CHPPTTTTTTTTTTTTTAAPATTT	NAMP
3	DHPPTTTTTTTTTTTTTAAPATTT	AMP
4	EHPPTTTTTTTTTTTTTAAPATTT	AMP
5	FHPPTTTTTTTTTTTTTAAPATTT	NAMP
6	GHPPTTTTTTTTTTTTTAAPATTT	AMP
7	HHPPTTTTTTTTTTTTTAAPATTT	AMP
8	IHPPTTTTTTTTTTTTTAAPATTT	NAMP
9	KHPPTTTTTTTTTTTTTAAPATTT	AMP
10	LHPPTTTTTTTTTTTTTAAPATTT	NAMP
11	MHPPTTTTTTTTTTTTTAAPATTT	NAMP
12	NHPPTTTTTTTTTTTTTAAPATTT	AMP
13	PHPPTTTTTTTTTTTTTAAPATTT	AMP
14	QHPPTTTTTTTTTTTTTAAPATTT	AMP
15	RHPPTTTTTTTTTTTTTAAPATTT	AMP
16	SHPPTTTTTTTTTTTTTAAPATTT	AMP
17	VHPPTTTTTTTTTTTTTAAPATTT	NAMP
18	WHPPTTTTTTTTTTTTTAAPATTT	NAMP
19	YHPPTTTTTTTTTTTTTAAPATTT	AMP
20	TAPPTTTTTTTTTTTTTAAPATTT	AMP
21	TCPPTTTTTTTTTTTTTAAPATTT	NAMP
22	TDPPTTTTTTTTTTTTTAAPATTT	AMP
23	TEPPTTTTTTTTTTTTTAAPATTT	AMP
24	TFPPTTTTTTTTTTTTTAAPATTT	NAMP
25	TGPPTTTTTTTTTTTTTAAPATTT	AMP
26	TIPPTTTTTTTTTTTTTAAPATTT	NAMP
27	TKPPTTTTTTTTTTTTTAAPATTT	AMP
28	TLPPTTTTTTTTTTTTTAAPATTT	NAMP
29	TMPPTTTTTTTTTTTTTAAPATTT	NAMP
30	TNPPTTTTTTTTTTTTTAAPATTT	AMP
31	TPPPTTTTTTTTTTTTTAAPATTT	AMP
32	TQPPTTTTTTTTTTTTTAAPATTT	AMP
33	TRPPTTTTTTTTTTTTTAAPATTT	AMP
34	TSPPTTTTTTTTTTTTTAAPATTT	AMP
35	TTPPTTTTTTTTTTTTTAAPATTT	AMP
36	TVPPTTTTTTTTTTTTTAAPATTT	NAMP
37	TWPPTTTTTTTTTTTTTAAPATTT	NAMP
38	TYPPTTTTTTTTTTTTTAAPATTT	AMP
39	THAPTTTTTTTTTTTTTAAPATTT	AMP
40	THCPTTTTTTTTTTTTTAAPATTT	NAMP
41	THDPTTTTTTTTTTTTTAAPATTT	AMP
42	THEPTTTTTTTTTTTTTAAPATTT	AMP
43	THFPTTTTTTTTTTTTTAAPATTT	NAMP
44	THGPTTTTTTTTTTTTTAAPATTT	AMP
45	THHPTTTTTTTTTTTTTAAPATTT	AMP
46	THIPTTTTTTTTTTTTTAAPATTT	NAMP
47	THKPTTTTTTTTTTTTTAAPATTT	AMP
48	THLPTTTTTTTTTTTTTAAPATTT	NAMP
49	THMPTTTTTTTTTTTTTAAPATTT	NAMP
50	THNPTTTTTTTTTTTTTAAPATTT	AMP
51	THQPTTTTTTTTTTTTTAAPATTT	AMP
52	THRPTTTTTTTTTTTTTAAPATTT	AMP
53	THSPTTTTTTTTTTTTTAAPATTT	AMP
54	THTPTTTTTTTTTTTTTAAPATTT	AMP
55	THVPTTTTTTTTTTTTTAAPATTT	NAMP
56	THWPTTTTTTTTTTTTTAAPATTT	NAMP
57	THYPTTTTTTTTTTTTTAAPATTT	AMP
58	THPATTTTTTTTTTTTTAAPATTT	AMP
59	THPCTTTTTTTTTTTTTAAPATTT	NAMP
60	THPDTTTTTTTTTTTTTAAPATTT	AMP
61	THPETTTTTTTTTTTTTAAPATTT	AMP
62	THPFTTTTTTTTTTTTTAAPATTT	NAMP
63	THPGTTTTTTTTTTTTTAAPATTT	AMP
64	THPHTTTTTTTTTTTTTAAPATTT	AMP
65	THPITTTTTTTTTTTTTAAPATTT	NAMP
66	THPKTTTTTTTTTTTTTAAPATTT	AMP
67	THPLTTTTTTTTTTTTTAAPATTT	NAMP
68	THPMTTTTTTTTTTTTTAAPATTT	NAMP
69	THPNTTTTTTTTTTTTTAAPATTT	AMP
70	THPQTTTTTTTTTTTTTAAPATTT	AMP
71	THPRTTTTTTTTTTTTTAAPATTT	AMP
72	THPSTTTTTTTTTTTTTAAPATTT	AMP
73	THPTTTTTTTTTTTTTTAAPATTT	AMP
74	THPVTTTTTTTTTTTTTAAPATTT	NAMP
75	THPWTTTTTTTTTTTTTAAPATTT	NAMP
76	THPYTTTTTTTTTTTTTAAPATTT	AMP
77	THPPATTTTTTTTTTTTAAPATTT	AMP
78	THPPCTTTTTTTTTTTTAAPATTT	NAMP
79	THPPDTTTTTTTTTTTTAAPATTT	AMP
80	THPPETTTTTTTTTTTTAAPATTT	AMP
81	THPPFTTTTTTTTTTTTAAPATTT	NAMP
82	THPPGTTTTTTTTTTTTAAPATTT	AMP
83	THPPHTTTTTTTTTTTTAAPATTT	AMP
84	THPPITTTTTTTTTTTTAAPATTT	NAMP
85	THPPKTTTTTTTTTTTTAAPATTT	AMP
86	THPPLTTTTTTTTTTTTAAPATTT	NAMP
87	THPPMTTTTTTTTTTTTAAPATTT	NAMP
88	THPPNTTTTTTTTTTTTAAPATTT	AMP
89	THPPPTTTTTTTTTTTTAAPATTT	AMP
90	THPPQTTTTTTTTTTTTAAPATTT	AMP
91	THPPRTTTTTTTTTTTTAAPATTT	AMP
92	THPPSTTTTTTTTTTTTAAPATTT	AMP
93	THPPVTTTTTTTTTTTTAAPATTT	NAMP
94	THPPWTTTTTTTTTTTTAAPATTT	NAMP
95	THPPYTTTTTTTTTTTTAAPATTT	AMP
96	THPPTATTTTTTTTTTTAAPATTT	AMP
97	THPPTCTTTTTTTTTTTAAPATTT	NAMP
98	THPPTDTTTTTTTTTTTAAPATTT	AMP
99	THPPTETTTTTTTTTTTAAPATTT	AMP
100	THPPTFTTTTTTTTTTTAAPATTT	NAMP
101	THPPTGTTTTTTTTTTTAAPATTT	AMP
102	THPPTHTTTTTTTTTTTAAPATTT	AMP
103	THPPTITTTTTTTTTTTAAPATTT	NAMP
104	THPPTKTTTTTTTTTTTAAPATTT	AMP
105	THPPTLTTTTTTTTTTTAAPATTT	NAMP
106	THPPTMTTTTTTTTTTTAAPATTT	NAMP
107	THPPTNTTTTTTTTTTTAAPATTT	AMP
108	THPPTPTTTTTTTTTTTAAPATTT	AMP
109	THPPTQTTTTTTTTTTTAAPATTT	AMP
110	THPPTRTTTTTTTTTTTAAPATTT	AMP
111	THPPTSTTTTTTTTTTTAAPATTT	AMP
112	THPPTVTTTTTTTTTTTAAPATTT	NAMP
113	THPPTWTTTTTTTTTTTAAPATTT	NAMP
114	THPPTYTTTTTTTTTTTAAPATTT	AMP
115	THPPTTATTTTTTTTTTAAPATTT	AMP
116	THPPTTCTTTTTTTTTTAAPATTT	NAMP
117	THPPTTDTTTTTTTTTTAAPATTT	AMP
118	THPPTTETTTTTTTTTTAAPATTT	AMP
119	THPPTTFTTTTTTTTTTAAPATTT	NAMP
120	THPPTTGTTTTTTTTTTAAPATTT	AMP
121	THPPTTHTTTTTTTTTTAAPATTT	AMP
122	THPPTTITTTTTTTTTTAAPATTT	NAMP
123	THPPTTKTTTTTTTTTTAAPATTT	AMP
124	THPPTTLTTTTTTTTTTAAPATTT	NAMP
125	THPPTTMTTTTTTTTTTAAPATTT	NAMP
126	THPPTTNTTTTTTTTTTAAPATTT	AMP
127	THPPTTPTTTTTTTTTTAAPATTT	AMP
128	THPPTTQTTTTTTTTTTAAPATTT	AMP
129	THPPTTRTTTTTTTTTTAAPATTT	AMP
130	THPPTTSTTTTTTTTTTAAPATTT	AMP
131	THPPTTVTTTTTTTTTTAAPATTT	NAMP
132	THPPTTWTTTTTTTTTTAAPATTT	NAMP
133	THPPTTYTTTTTTTTTTAAPATTT	AMP
134	THPPTTTTTATTTTTTTAAPATTT	AMP
135	THPPTTTTTCTTTTTTTAAPATTT	NAMP
136	THPPTTTTTDTTTTTTTAAPATTT	AMP
137	THPPTTTTTETTTTTTTAAPATTT	AMP
138	THPPTTTTTFTTTTTTTAAPATTT	NAMP
139	THPPTTTTTGTTTTTTTAAPATTT	AMP
140	THPPTTTTTHTTTTTTTAAPATTT	AMP
141	THPPTTTTTITTTTTTTAAPATTT	NAMP
142	THPPTTTTTKTTTTTTTAAPATTT	AMP
143	THPPTTTTTLTTTTTTTAAPATTT	NAMP
144	THPPTTTTTMTTTTTTTAAPATTT	NAMP
145	THPPTTTTTNTTTTTTTAAPATTT	AMP
146	THPPTTTTTPTTTTTTTAAPATTT	AMP
147	THPPTTTTTQTTTTTTTAAPATTT	AMP		0.538
148	THPPTTTTTRTTTTTTTAAPATTT	AMP		0.536
149	THPPTTTTTSTTTTTTTAAPATTT	AMP		0.533
150	THPPTTTTTVTTTTTTTAAPATTT	NAMP		0.289
151	THPPTTTTTWTTTTTTTAAPATTT	NAMP		0.291
152	THPPTTTTTYTTTTTTTAAPATTT	AMP		0.5225
153	THPPTTTTTTATTTTTTAAPATTT	AMP		0.5335
154	THPPTTTTTTCTTTTTTAAPATTT	NAMP		0.304
155	THPPTTTTTTDTTTTTTAAPATTT	AMP		0.5805
156	THPPTTTTTTETTTTTTAAPATTT	AMP		0.579
157	THPPTTTTTTFTTTTTTAAPATTT	NAMP		0.3005
158	THPPTTTTTTGTTTTTTAAPATTT	AMP		0.538
159	THPPTTTTTTHTTTTTTAAPATTT	AMP		0.5395
160	THPPTTTTTTITTTTTTAAPATTT	NAMP		0.293
161	THPPTTTTTTKTTTTTTAAPATTT	AMP		0.5345
162	THPPTTTTTTLTTTTTTAAPATTT	NAMP		0.293
163	THPPTTTTTTMTTTTTTAAPATTT	NAMP		0.2885
164	THPPTTTTTTNTTTTTTAAPATTT	AMP		0.537
165	THPPTTTTTTPTTTTTTAAPATTT	AMP		0.5385
166	THPPTTTTTTQTTTTTTAAPATTT	AMP		0.538
167	THPPTTTTTTRTTTTTTAAPATTT	AMP		0.536
168	THPPTTTTTTSTTTTTTAAPATTT	AMP		0.533
169	THPPTTTTTTVTTTTTTAAPATTT	NAMP		0.2965
170	THPPTTTTTTWTTTTTTAAPATTT	NAMP		0.299
171	THPPTTTTTTYTTTTTTAAPATTT	AMP		0.5205
172	THPPTTTTTTTATTTTTAAPATTT	AMP		0.533
173	THPPTTTTTTTCTTTTTAAPATTT	NAMP		0.295
174	THPPTTTTTTTDTTTTTAAPATTT	AMP		0.5805
175	THPPTTTTTTTETTTTTAAPATTT	AMP		0.579
176	THPPTTTTTTTFTTTTTAAPATTT	NAMP		0.291
177	THPPTTTTTTTGTTTTTAAPATTT	AMP		0.5375
178	THPPTTTTTTTHTTTTTAAPATTT	AMP		0.5395
179	THPPTTTTTTTITTTTTAAPATTT	NAMP		0.2835
180	THPPTTTTTTTKTTTTTAAPATTT	AMP		0.5345
181	THPPTTTTTTTLTTTTTAAPATTT	NAMP		0.2835
182	THPPTTTTTTTMTTTTTAAPATTT	NAMP		0.2705
183	THPPTTTTTTTNTTTTTAAPATTT	AMP		0.537
184	THPPTTTTTTTPTTTTTAAPATTT	AMP		0.5385
185	THPPTTTTTTTQTTTTTAAPATTT	AMP		0.538
186	THPPTTTTTTTRTTTTTAAPATTT	AMP		0.536
187	THPPTTTTTTTSTTTTTAAPATTT	AMP		0.533
188	THPPTTTTTTTVTTTTTAAPATTT	NAMP		0.287
189	THPPTTTTTTTWTTTTTAAPATTT	NAMP		0.2895
190	THPPTTTTTTTYTTTTTAAPATTT	AMP		0.52
191	THPPTTTTTTTTATTTTAAPATTT	AMP		0.533
192	THPPTTTTTTTTCTTTTAAPATTT	NAMP		0.2985
193	THPPTTTTTTTTDTTTTAAPATTT	AMP		0.5785
194	THPPTTTTTTTTETTTTAAPATTT	AMP		0.5765
195	THPPTTTTTTTTFTTTTAAPATTT	NAMP		0.2955
196	THPPTTTTTTTTGTTTTAAPATTT	AMP		0.5365
197	THPPTTTTTTTTHTTTTAAPATTT	AMP		0.5395
198	THPPTTTTTTTTITTTTAAPATTT	NAMP		0.2885
199	THPPTTTTTTTTKTTTTAAPATTT	AMP		0.5345
200	THPPTTTTTTTTLTTTTAAPATTT	NAMP		0.289
201	THPPTTTTTTTTMTTTTAAPATTT	NAMP		0.274
202	THPPTTTTTTTTNTTTTAAPATTT	AMP		0.537
203	THPPTTTTTTTTPTTTTAAPATTT	AMP		0.5385
204	THPPTTTTTTTTQTTTTAAPATTT	AMP		0.538
205	THPPTTTTTTTTRTTTTAAPATTT	AMP		0.536
206	THPPTTTTTTTTSTTTTAAPATTT	AMP		0.533
207	THPPTTTTTTTTVTTTTAAPATTT	NAMP		0.292
208	THPPTTTTTTTTWTTTTAAPATTT	NAMP		0.294
209	THPPTTTTTTTTYTTTTAAPATTT	AMP		0.52
210	THPPTTTTTTTTTATTTAAPATTT	AMP		0.5325
211	THPPTTTTTTTTTCTTTAAPATTT	NAMP		0.298
212	THPPTTTTTTTTTDTTTAAPATTT	AMP		0.5785
213	THPPTTTTTTTTTETTTAAPATTT	AMP		0.5765
214	THPPTTTTTTTTTFTTTAAPATTT	NAMP		0.295
215	THPPTTTTTTTTTGTTTAAPATTT	AMP		0.536
216	THPPTTTTTTTTTHTTTAAPATTT	AMP		0.5395
217	THPPTTTTTTTTTITTTAAPATTT	NAMP		0.288
218	THPPTTTTTTTTTKTTTAAPATTT	AMP		0.5345
219	THPPTTTTTTTTTLTTTAAPATTT	NAMP		0.2885
220	THPPTTTTTTTTTMTTTAAPATTT	NAMP		0.284
221	THPPTTTTTTTTTNTTTAAPATTT	AMP		0.537
222	THPPTTTTTTTTTPTTTAAPATTT	AMP		0.5385
223	THPPTTTTTTTTTQTTTAAPATTT	AMP		0.538
224	THPPTTTTTTTTTRTTTAAPATTT	AMP		0.536
225	THPPTTTTTTTTTSTTTAAPATTT	AMP		0.533
226	THPPTTTTTTTTTVTTTAAPATTT	NAMP		0.2915
227	THPPTTTTTTTTTWTTTAAPATTT	NAMP		0.2935
228	THPPTTTTTTTTTYTTTAAPATTT	AMP		0.52
229	THPPTTTTTTTTTTATTAAPATTT	AMP		0.5345
230	THPPTTTTTTTTTTCTTAAPATTT	NAMP		0.3035
231	THPPTTTTTTTTTTDTTAAPATTT	AMP		0.5785
232	THPPTTTTTTTTTTETTAAPATTT	AMP		0.5765
233	THPPTTTTTTTTTTFTTAAPATTT	NAMP		0.3005
234	THPPTTTTTTTTTTGTTAAPATTT	AMP		0.538
235	THPPTTTTTTTTTTHTTAAPATTT	AMP		0.5395
236	THPPTTTTTTTTTTITTAAPATTT	NAMP		0.2945
237	THPPTTTTTTTTTTKTTAAPATTT	AMP		0.5345
238	THPPTTTTTTTTTTLTTAAPATTT	NAMP		0.295
239	THPPTTTTTTTTTTMTTAAPATTT	NAMP		0.285
240	THPPTTTTTTTTTTNTTAAPATTT	AMP		0.537
241	THPPTTTTTTTTTTPTTAAPATTT	AMP		0.5385
242	THPPTTTTTTTTTTQTTAAPATTT	AMP		0.538
243	THPPTTTTTTTTTTRTTAAPATTT	AMP		0.536
244	THPPTTTTTTTTTTSTTAAPATTT	AMP		0.533
245	THPPTTTTTTTTTTVTTAAPATTT	NAMP		0.2975
246	THPPTTTTTTTTTTWTTAAPATTT	NAMP		0.2995
247	THPPTTTTTTTTTTYTTAAPATTT	AMP		0.52
248	THPPTTTTTTTTTTTATAAPATTT	AMP		0.5345
249	THPPTTTTTTTTTTTCTAAPATTT	NAMP		0.3045
250	THPPTTTTTTTTTTTDTAAPATTT	AMP		0.579
251	THPPTTTTTTTTTTTETAAPATTT	AMP		0.577
252	THPPTTTTTTTTTTTFTAAPATTT	NAMP		0.3015
253	THPPTTTTTTTTTTTGTAAPATTT	AMP		0.538
254	THPPTTTTTTTTTTTHTAAPATTT	AMP		0.5395
255	THPPTTTTTTTTTTTITAAPATTT	NAMP		0.2955
256	THPPTTTTTTTTTTTKTAAPATTT	AMP		0.5345
257	THPPTTTTTTTTTTTLTAAPATTT	NAMP		0.296
258	THPPTTTTTTTTTTTMTAAPATTT	NAMP		0.3
259	THPPTTTTTTTTTTTNTAAPATTT	AMP		0.537
260	THPPTTTTTTTTTTTPTAAPATTT	AMP		0.5385
261	THPPTTTTTTTTTTTQTAAPATTT	AMP		0.538
262	THPPTTTTTTTTTTTRTAAPATTT	AMP		0.536
263	THPPTTTTTTTTTTTSTAAPATTT	AMP		0.533
264	THPPTTTTTTTTTTTVTAAPATTT	NAMP		0.2985
265	THPPTTTTTTTTTTTWTAAPATTT	NAMP		0.2985
266	THPPTTTTTTTTTTTYTAAPATTT	AMP		0.519
267	THPPTTTTTTTTTTTTAAAPATTT	AMP		0.5345
268	THPPTTTTTTTTTTTTCAAPATTT	NAMP		0.305
269	THPPTTTTTTTTTTTTDAAPATTT	AMP		0.58
270	THPPTTTTTTTTTTTTEAAPATTT	AMP		0.5775
271	THPPTTTTTTTTTTTTFAAPATTT	NAMP		0.302
272	THPPTTTTTTTTTTTTGAAPATTT	AMP		0.538
273	THPPTTTTTTTTTTTTHAAPATTT	AMP		0.5395
274	THPPTTTTTTTTTTTTIAAPATTT	NAMP		0.296
275	THPPTTTTTTTTTTTTKAAPATTT	AMP		0.536
276	THPPTTTTTTTTTTTTLAAPATTT	NAMP		2965
277	THPPTTTTTTTTTTTTMAAPATTT	NAMP		0.299
278	THPPTTTTTTTTTTTTNAAPATTT	AMP		0.5375
279	THPPTTTTTTTTTTTTPAAPATTT	AMP		0.5385
280	THPPTTTTTTTTTTTTQAAPATTT	AMP		0.5385
281	THPPTTTTTTTTTTTTRAAPATTT	AMP		0.5375
282	THPPTTTTTTTTTTTTSAAPATTT	AMP		0.533
283	THPPTTTTTTTTTTTTVAAPATTT	NAMP
284	THPPTTTTTTTTTTTTWAAPATTT	NAMP
285	THPPTTTTTTTTTTTTYAAPATTT	AMP
286	THPPTTTTTTTTTTTTTCAPATTT	NAMP
287	THPPTTTTTTTTTTTTTDAPATTT	AMP
288	THPPTTTTTTTTTTTTTEAPATTT	AMP
289	THPPTTTTTTTTTTTTTFAPATTT	NAMP
290	THPPTTTTTTTTTTTTTGAPATTT	AMP
291	THPPTTTTTTTTTTTTTHAPATTT	AMP
292	THPPTTTTTTTTTTTTTIAPATTT	NAMP
293	THPPTTTTTTTTTTTTTKAPATTT	AMP
294	THPPTTTTTTTTTTTTTLAPATTT	NAMP
295	THPPTTTTTTTTTTTTTMAPATTT	NAMP
296	THPPTTTTTTTTTTTTTNAPATTT	AMP
297	THPPTTTTTTTTTTTTTPAPATTT	AMP
298	THPPTTTTTTTTTTTTTQAPATTT	AMP
299	THPPTTTTTTTTTTTTTRAPATTT	AMP
300	THPPTTTTTTTTTTTTTSAPATTT	AMP
301	THPPTTTTTTTTTTTTTTAPATTT	AMP
302	THPPTTTTTTTTTTTTTVAPATTT	NAMP
303	THPPTTTTTTTTTTTTTWAPATTT	NAMP
304	THPPTTTTTTTTTTTTTYAPATTT	AMP
305	THPPTTTTTTTTTTTTTACPATTT	NAMP
306	THPPTTTTTTTTTTTTTADPATTT	AMP
307	THPPTTTTTTTTTTTTTAEPATTT	AMP
308	THPPTTTTTTTTTTTTTAFPATTT	NAMP
309	THPPTTTTTTTTTTTTTAGPATTT	AMP
310	THPPTTTTTTTTTTTTTAHPATTT	AMP
311	THPPTTTTTTTTTTTTTAIPATTT	NAMP
312	THPPTTTTTTTTTTTTTAKPATTT	AMP
313	THPPTTTTTTTTTTTTTALPATTT	NAMP
314	THPPTTTTTTTTTTTTTAMPATTT	NAMP
315	THPPTTTTTTTTTTTTTANPATTT	AMP
316	THPPTTTTTTTTTTTTTAPPATTT	AMP
317	THPPTTTTTTTTTTTTTAQPATTT	AMP
318	THPPTTTTTTTTTTTTTARPATTT	AMP
319	THPPTTTTTTTTTTTTTASPATTT	AMP
320	THPPTTTTTTTTTTTTTATPATTT	AMP
321	THPPTTTTTTTTTTTTTAVPATTT	NAMP
322	THPPTTTTTTTTTTTTTAWPATTT	NAMP
323	THPPTTTTTTTTTTTTTAYPATTT	AMP
324	THPPTTTTTTTTTTTTTAAAATTT	AMP
325	THPPTTTTTTTTTTTTTAACATTT	NAMP
326	THPPTTTTTTTTTTTTTAADATTT	AMP
327	THPPTTTTTTTTTTTTTAAEATTT	AMP
328	THPPTTTTTTTTTTTTTAAFATTT	NAMP
329	THPPTTTTTTTTTTTTTAAGATTT	AMP
330	THPPTTTTTTTTTTTTTAAHATTT	AMP
331	THPPTTTTTTTTTTTTTAAIATTT	NAMP
332	THPPTTTTTTTTTTTTTAAKATTT	AMP
333	THPPTTTTTTTTTTTTTAALATTT	NAMP
334	THPPTTTTTTTTTTTTTAAMATTT	NAMP
335	THPPTTTTTTTTTTTTTAANATTT	AMP
336	THPPTTTTTTTTTTTTTAAQATTT	AMP
337	THPPTTTTTTTTTTTTTAARATTT	AMP
338	THPPTTTTTTTTTTTTTAASATTT	AMP
339	THPPTTTTTTTTTTTTTAATATTT	AMP
340	THPPTTTTTTTTTTTTTAAVATTT	NAMP
341	THPPTTTTTTTTTTTTTAAWATTT	NAMP
342	THPPTTTTTTTTTTTTTAAYATTT	AMP
343	THPPTTTTTTTTTTTTTAAPCTTT	NAMP
344	THPPTTTTTTTTTTTTTAAPDTTT	AMP
345	THPPTTTTTTTTTTTTTAAPETTT	AMP
346	THPPTTTTTTTTTTTTTAAPFTTT	NAMP
347	THPPTTTTTTTTTTTTTAAPGTTT	AMP
348	THPPTTTTTTTTTTTTTAAPHTTT	AMP
349	THPPTTTTTTTTTTTTTAAPITTT	NAMP
350	THPPTTTTTTTTTTTTTAAPKTTT	AMP
351	THPPTTTTTTTTTTTTTAAPLTTT	NAMP
352	THPPTTTTTTTTTTTTTAAPMTTT	NAMP
353	THPPTTTTTTTTTTTTTAAPNTTT	AMP
354	THPPTTTTTTTTTTTTTAAPPTTT	AMP
355	THPPTTTTTTTTTTTTTAAPQTTT	AMP
356	THPPTTTTTTTTTTTTTAAPRTTT	AMP
357	THPPTTTTTTTTTTTTTAAPSTTT	AMP
358	THPPTTTTTTTTTTTTTAAPTTTT	AMP
359	THPPTTTTTTTTTTTTTAAPVTTT	NAMP
360	THPPTTTTTTTTTTTTTAAPWTTT	NAMP
361	THPPTTTTTTTTTTTTTAAPYTTT	AMP
362	THPPTTTTTTTTTTTTTAAPAATT	AMP
363	THPPTTTTTTTTTTTTTAAPACTT	NAMP
364	THPPTTTTTTTTTTTTTAAPADTT	AMP
365	THPPTTTTTTTTTTTTTAAPAETT	AMP
366	THPPTTTTTTTTTTTTTAAPAFTT	NAMP
367	THPPTTTTTTTTTTTTTAAPAGTT	AMP
368	THPPTTTTTTTTTTTTTAAPAHTT	AMP
369	THPPTTTTTTTTTTTTTAAPAITT	NAMP
370	THPPTTTTTTTTTTTTTAAPAKTT	AMP
371	THPPTTTTTTTTTTTTTAAPALTT	NAMP
372	THPPTTTTTTTTTTTTTAAPAMTT	NAMP
373	THPPTTTTTTTTTTTTTAAPANTT	AMP
374	THPPTTTTTTTTTTTTTAAPAPTT	AMP
375	THPPTTTTTTTTTTTTTAAPAQTT	AMP
376	THPPTTTTTTTTTTTTTAAPARTT	AMP
377	THPPTTTTTTTTTTTTTAAPASTT	AMP
378	THPPTTTTTTTTTTTTTAAPAVTT	NAMP
379	THPPTTTTTTTTTTTTTAAPAWTT	NAMP
380	THPPTTTTTTTTTTTTTAAPAYTT	AMP
381	THPPTTTTTTTTTTTTTAAPATAT	AMP
382	THPPTTTTTTTTTTTTTAAPATCT	NAMP
383	THPPTTTTTTTTTTTTTAAPATDT	AMP
384	THPPTTTTTTTTTTTTTAAPATET	AMP
385	THPPTTTTTTTTTTTTTAAPATFT	NAMP
386	THPPTTTTTTTTTTTTTAAPATGT	AMP
387	THPPTTTTTTTTTTTTTAAPATHT	AMP
388	THPPTTTTTTTTTTTTTAAPATIT	NAMP
389	THPPTTTTTTTTTTTTTAAPATKT	AMP
390	THPPTTTTTTTTTTTTTAAPATLT	NAMP
391	THPPTTTTTTTTTTTTTAAPATMT	NAMP
392	THPPTTTTTTTTTTTTTAAPATNT	AMP
393	THPPTTTTTTTTTTTTTAAPATPT	AMP
394	THPPTTTTTTTTTTTTTAAPATQT	AMP
395	THPPTTTTTTTTTTTTTAAPATRT	AMP
396	THPPTTTTTTTTTTTTTAAPATST	AMP
397	THPPTTTTTTTTTTTTTAAPATVT	NAMP
398	THPPTTTTTTTTTTTTTAAPATWT	NAMP
399	THPPTTTTTTTTTTTTTAAPATYT	AMP
400	THPPTTTTTTTTTTTTTAAPATTA	AMP
401	THPPTTTTTTTTTTTTTAAPATTC	NAMP
402	THPPTTTTTTTTTTTTTAAPATTD	AMP
403	THPPTTTTTTTTTTTTTAAPATTE	AMP
404	THPPTTTTTTTTTTTTTAAPATTF	NAMP
405	THPPTTTTTTTTTTTTTAAPATTG	AMP
406	THPPTTTTTTTTTTTTTAAPATTH	AMP
407	THPPTTTTTTTTTTTTTAAPATTI	NAMP
408	THPPTTTTTTTTTTTTTAAPATTK	AMP
409	THPPTTTTTTTTTTTTTAAPATTL	NAMP
410	THPPTTTTTTTTTTTTTAAPATTM	NAMP
411	THPPTTTTTTTTTTTTTAAPATTN	AMP
412	THPPTTTTTTTTTTTTTAAPATTP	AMP
413	THPPTTTTTTTTTTTTTAAPATTQ	AMP
414	THPPTTTTTTTTTTTTTAAPATTR	AMP
415	THPPTTTTTTTTTTTTTAAPATTS	AMP
416	THPPTTTTTTTTTTTTTAAPATTV	NAMP
417	THPPTTTTTTTTTTTTTAAPATTW	NAMP
418	THPPTTTTTTTTTTTTTAAPATTY	AMP
